# Supplementary material for: Integrated Metabolome and Transcriptome Analyses Reveal That the Flavonoid Metabolic Pathway Is Associated with Pigment Differential Accumulation in Two Colors of Petaloid Staminodes in Canna glauca
Source: MDPI journal article supplement (doi:10.3390/horticulturae10040372), 2024-04-07
Supplement: s1 [file s1]

Archive with 11 entries (11 files):
- Supplemenraty Figure S1.pdf
- Supplemenraty Figure S3.pdf
- Supplemenraty Table S1.xlsx
- Supplemenraty Table S4.xlsx
- Supplementary Figure S2.pdf
- Supplementary Table S2.xlsx
- Supplementary Table S3.xlsx
- Supplementary Table S5.xlsx
- Supplementary Table S6.xlsx
- Supplementary Table S7.xlsx
- Supplementary Table S8.xlsx
