# Supplementary material for: Integrated Metabolome and Transcriptome Analyses Reveal That the Flavonoid Metabolic Pathway Is Associated with Pigment Differential Accumulation in Two Colors of Petaloid Staminodes in Canna glauca
Source: MDPI journal article supplement (doi:10.3390/horticulturae10040372), 2024-04-07
Supplement: s1 [file s1 › Supplemenraty Table S1.xlsx]

## Sheet: Sheet1
Supplementary Table S1 qRT-PCR primers
Gene ID	F-primer	R-primer
Cluster-17340.0	TTACTACTTCCGCATCACCAACA	CTCCTTCAGTATCTCCTCGCTCA
Cluster-17340.2	CAAGCCAGACCATCCTCCC	CATGTTGCCGTACTCGCTCA
Cluster-16437.0	GAGCAACGGGCGATTCAA	GCCAGCGGATACACGATTG
Cluster-13713.0	AGGGTGGAACTCGGTGCTG	CGCCCACTTCCCAAACG
Cluster-27682.0	TGGTTAAGAGTCCTAGAAAGGGCT	GCCAAAGGAAACATAAACAACTGA
Cluster-15881.0	TGGGAGCGAGGCTATGTTG	TCCGCAGAACCCACAGAAA
Cluster-16437.1	AACGAGCAGACGCTACGGG	TGAAGGTGGCTGGAGACGAT
Cluster-34059.0	AACAGGCGTTGGCGAAGA	CCCAGCCGAAGTCAGCATC
Cluster-23068.0-F	CAAGATCCAGGGCTACGGC	ATGTAGTTTGATGGCTGCTTCG
Cluster-19592.3-F	CAAGGACAACCGCCTCAGAC	CATCTAAGATGTAATCAATCGCACA
Cluster-20066.0-F	GTCGGTTCCTGGCTCGTAAT	TGACCTCGTCGAAGCTCCC
Cluster-21745.0-F	AAATGGTGCAGGTCCGAGTG	GGGCGGTAGAAGTAGATGGTG
Cluster-20989.10-F	GGCACCATACCTTCTACAACGA	AGGACAGCCTGGATAGCAACAT
