# Supplementary material for: Integrated Metabolome and Transcriptome Analyses Reveal That the Flavonoid Metabolic Pathway Is Associated with Pigment Differential Accumulation in Two Colors of Petaloid Staminodes in Canna glauca
Source: MDPI journal article supplement (doi:10.3390/horticulturae10040372), 2024-04-07
Supplement: s1 [file s1 › Supplemenraty Table S4.xlsx]

## Sheet: Sheet1
Supplementary Table S4 The differentially expressed genes (DEGs) in CgpsP vs CgpsY
ID	CgpsY-fpkm	CgpsP-fpkm	log2FoldChange	pvalue	padj	regulated	length
Cluster-10668.0	0.316667	64.21	7.90003	0	0	up	2656
Cluster-10677.0	36.4233	112.827	1.88388	0	0	up	1657
Cluster-10851.1	19.9633	56.7767	1.75844	0	0	up	3557
Cluster-11560.0	32.27	190.657	2.81535	0	0	up	1498
Cluster-11564.0	36.8667	175.097	2.50141	0	0	up	1316
Cluster-11699.0	4.76	360.193	6.49549	0	0	up	1286
Cluster-12137.1	121.353	18.8667	-2.49429	0	0	down	1670
Cluster-12767.0	49.2767	175.9	2.0752	0	0	up	1102
Cluster-13759.0	144.997	13.0033	-3.22249	0	0	down	1051
Cluster-14141.0	157.637	9.15	-3.85416	0	0	down	1905
Cluster-14529.2	212.23	16.9133	-3.39939	0	0	down	1571
Cluster-14529.3	289.557	909.46	1.90422	0	0	up	1583
Cluster-1459.3	51.29	115.27	1.40778	0	0	up	3475
Cluster-14689.0	846.74	227.73	-1.63732	0	0	down	975
Cluster-14833.0	1.19	89.5733	7.17577	0	0	up	2001
Cluster-14868.5	7.23667	39.2267	2.68348	0	0	up	2721
Cluster-15210.0	108.03	283.263	1.64239	0	0	up	2388
Cluster-15465.2	20.48	62.4133	1.90022	0	0	up	1999
Cluster-15601.0	117.72	298.67	1.60142	0	0	up	793
Cluster-15641.0	46.21	318.307	3.0351	0	0	up	1436
Cluster-15644.0	50.6833	240.077	2.4971	0	0	up	1374
Cluster-15832.4	120.527	390.847	1.95614	0	0	up	744
Cluster-15949.1	373.79	147.317	-1.08994	0	0	down	1659
Cluster-16437.0	10.5833	163.9	4.18634	0	0	up	1638
Cluster-16437.1	530.173	213.37	-1.08713	0	0	down	2059
Cluster-16477.0	85.1333	194.373	1.44312	0	0	up	1608
Cluster-16542.0	263.743	67.9467	-1.70136	0	0	down	1277
Cluster-16709.0	65.01	334.673	2.61481	0	0	up	3023
Cluster-17105.0	587.713	2130.92	2.1148	0	0	up	912
Cluster-17222.5	20.6933	68.2	1.76818	0	0	up	2539
Cluster-17340.2	785.003	3181.88	2.27714	0	0	up	1382
Cluster-17402.0	35.6467	89.6333	1.5811	0	0	up	2645
Cluster-17410.0	26.8067	75.86	1.73228	0	0	up	2608
Cluster-17429.0	2.36	394.013	7.67094	0	0	up	692
Cluster-17429.1	2.68333	426.173	7.60552	0	0	up	760
Cluster-17510.3	80.0267	142.887	1.08636	0	0	up	5282
Cluster-17529.1	11.6967	59.27	2.58074	0	0	up	2482
Cluster-17530.0	35.35	59.95	1.14974	0	0	up	8281
Cluster-17683.0	46.0733	153.023	2.02397	0	0	up	2195
Cluster-17719.0	101.977	202.947	1.24402	0	0	up	2703
Cluster-17763.0	97.8967	324.57	1.98637	0	0	up	902
Cluster-18083.2	2.24333	3219.4	10.7685	0	0	up	833
Cluster-18273.0	49.4	129.97	1.64908	0	0	up	3279
Cluster-18446.1	39.2267	96.45	1.53282	0	0	up	3297
Cluster-18454.0	3.00667	862.577	8.42157	0	0	up	1091
Cluster-18479.1	34.63	86.22	1.5475	0	0	up	2460
Cluster-18497.0	31.8067	160.087	2.58239	0	0	up	1425
Cluster-19041.0	374.6	119.713	-1.39464	0	0	down	2323
Cluster-19120.0	69.5567	1149.43	4.28254	0	0	up	3507
Cluster-19129.0	2.07	181.493	6.7314	0	0	up	979
Cluster-19592.3	136.633	282.607	1.30248	0	0	up	1806
Cluster-19647.0	1.34	26.5267	4.55895	0	0	up	3438
Cluster-19669.0	559.067	205.767	-1.1908	0	0	down	2551
Cluster-20066.0	3.51667	67.36	4.51551	0	0	up	1453
Cluster-20154.0	134.237	504.79	2.16624	0	0	up	1005
Cluster-20186.1	27.89	79.5167	1.76327	0	0	up	2572
Cluster-20613.1	257.347	72.6367	-1.57555	0	0	down	1544
Cluster-20683.10	53.8133	243.197	2.47467	0	0	up	1957
Cluster-20800.8	11.76	47.9767	2.28087	0	0	up	2369
Cluster-20989.7	65.3567	190.697	1.79868	0	0	up	1324
Cluster-21089.2	101.977	12.82	-2.73944	0	0	down	1094
Cluster-21215.9	57.5	215.543	2.1991	0	0	up	2843
Cluster-21229.0	209.003	632.36	1.85369	0	0	up	967
Cluster-21235.0	63.6733	208.41	1.95588	0	0	up	1865
Cluster-21922.0	38.46	100.613	1.63932	0	0	up	2092
Cluster-22026.4	47.6	94.07	1.23269	0	0	up	4697
Cluster-22117.0	3778.98	9985.65	1.65669	0	0	up	1124
Cluster-22277.1	2.26333	226.087	6.89142	0	0	up	3032
Cluster-22292.0	311.477	995.993	2.02194	0	0	up	1275
Cluster-22514.0	76.6767	222.087	1.7872	0	0	up	1803
Cluster-22527.0	27.9167	69.3133	1.54238	0	0	up	4194
Cluster-22734.0	13.9567	62.87	2.41969	0	0	up	1876
Cluster-23068.0	1.33	118.467	6.72981	0	0	up	1602
Cluster-23229.0	41.7867	215.927	2.62594	0	0	up	902
Cluster-23249.0	464.773	184.89	-1.07801	0	0	down	3885
Cluster-23556.5	233.587	807.74	2.03943	0	0	up	1249
Cluster-23680.1	740.923	208.733	-1.56881	0	0	down	785
Cluster-23840.0	2.26333	19.2133	3.48015	0	0	up	5976
Cluster-24099.0	0.723333	34.7467	5.9141	0	0	up	4178
Cluster-24202.0	53.8833	290.467	2.68359	0	0	up	1825
Cluster-24206.1	13.3633	95.7467	3.09425	0	0	up	1629
Cluster-24582.1	887.8	30.5633	-4.60538	0	0	down	786
Cluster-24907.0	59.65	186.23	1.88021	0	0	up	2745
Cluster-25096.0	3.7	39.4	3.66553	0	0	up	3812
Cluster-25159.0	26.3933	245.777	3.47589	0	0	up	887
Cluster-25323.1	0.556667	51.58	6.79486	0	0	up	2506
Cluster-25564.2	188.797	1173.5	2.88776	0	0	up	1510
Cluster-25594.3	161.86	287.087	1.07667	0	0	up	3203
Cluster-25902.0	2.96333	685.183	8.03851	0	0	up	1257
Cluster-25910.0	244.727	491.66	1.23045	0	0	up	2823
Cluster-25956.0	46.1267	86.99	1.16442	0	0	up	4383
Cluster-25961.0	267.253	103.577	-1.11604	0	0	down	2271
Cluster-26123.1	120.35	294.747	1.54351	0	0	up	2452
Cluster-26406.0	22.67	209.323	3.46732	0	0	up	698
Cluster-26436.5	9.04	271.12	5.1726	0	0	up	728
Cluster-26469.4	487.573	43.43	-3.24547	0	0	down	1070
Cluster-26556.0	112.763	406.207	2.10861	0	0	up	758
Cluster-26774.9	3.99667	38.76	3.52119	0	0	up	2078
Cluster-26868.0	830.82	1735.04	1.32219	0	0	up	672
Cluster-27148.0	20.4033	84.2733	2.35275	0	0	up	2374
Cluster-27259.0	66.21	160.773	1.53267	0	0	up	1629
Cluster-27270.0	2.87	23.0467	3.27122	0	0	up	4129
Cluster-27286.9	459.407	1230.41	1.68144	0	0	up	736
Cluster-27288.3	16.1233	53.0067	1.96928	0	0	up	2589
Cluster-27332.3	1087.92	4071.8	2.16463	0	0	up	730
Cluster-27464.0	28.47	113.367	2.24659	0	0	up	1887
Cluster-27500.0	12.9567	77.0267	2.81967	0	0	up	1317
Cluster-28002.0	19.5933	54.9567	1.73953	0	0	up	2761
Cluster-28309.0	38.98	152.263	2.21372	0	0	up	2977
Cluster-28342.0	125.367	51.2433	-1.03888	0	0	down	4681
Cluster-28357.0	1849.39	4966.59	1.67988	0	0	up	1141
Cluster-28472.0	140.033	281.393	1.25873	0	0	up	2684
Cluster-28845.0	17.3767	94.64	2.70526	0	0	up	1596
Cluster-28952.1	47.7833	84.95	1.09603	0	0	up	5403
Cluster-28985.3	324.493	99.6267	-1.45022	0	0	down	1243
Cluster-28985.4	2008.14	469.533	-1.84257	0	0	down	1243
Cluster-29227.0	7.70333	52.2133	3.00207	0	0	up	2596
Cluster-29249.1	168.097	28.31	-2.31792	0	0	down	1957
Cluster-29251.0	176.917	50.79	-1.5087	0	0	down	3381
Cluster-29322.10	47.9833	95.67	1.24785	0	0	up	2761
Cluster-29394.14	111.127	302.41	1.69608	0	0	up	2291
Cluster-29394.8	454.373	862.463	1.17889	0	0	up	1148
Cluster-29491.1	7.63	28.5133	2.15241	0	0	up	4763
Cluster-30049.0	642.5	134.797	-2.00353	0	0	down	2104
Cluster-30057.1	240.487	55.4633	-1.86194	0	0	down	2005
Cluster-30063.1	219.213	52.7833	-1.80185	0	0	down	1695
Cluster-30143.6	9.87333	103.433	3.65202	0	0	up	1013
Cluster-30164.4	32.3033	85.5267	1.65642	0	0	up	2119
Cluster-30225.0	7.19	49.0033	3.02272	0	0	up	1976
Cluster-30341.0	20.98	98.2433	2.48319	0	0	up	1099
Cluster-30396.0	8.61667	567.987	6.30075	0	0	up	1169
Cluster-30396.1	4.71	395.75	6.64003	0	0	up	3411
Cluster-30454.1	1715.12	282.083	-2.35613	0	0	down	2050
Cluster-30627.0	59.5133	180.127	1.85025	0	0	up	1567
Cluster-30676.1	120.44	9.68	-3.38484	0	0	down	1837
Cluster-30900.2	1773.85	548.14	-1.43371	0	0	down	813
Cluster-3101.2	412.757	911.563	1.3958	0	0	up	1046
Cluster-31119.1	265.087	786.857	1.81086	0	0	up	1279
Cluster-31139.0	84.6667	149.107	1.29531	0	0	up	2430
Cluster-31203.3	111.423	37.0067	-1.33989	0	0	down	4475
Cluster-31340.1	94.5533	766.027	3.27704	0	0	up	809
Cluster-31340.5	1542.58	3313.96	1.36161	0	0	up	797
Cluster-31340.8	1563.77	1.15333	-10.1748	0	0	down	812
Cluster-31353.11	4454.2	383.283	-2.38861	0	0	down	3911
Cluster-31353.3	5155.67	1218.39	-1.82634	0	0	down	1083
Cluster-31353.5	6183.56	1526.37	-1.72689	0	0	down	343
Cluster-31353.7	2303.54	448.767	-2.10957	0	0	down	4243
Cluster-31353.9	519.01	210.05	-1.05479	0	0	down	4136
Cluster-31401.1	38.3433	156.853	2.34656	0	0	up	1284
Cluster-31459.0	95.4367	414.61	2.38548	0	0	up	1443
Cluster-32219.2	498.643	2574.23	2.62324	0	0	up	1030
Cluster-32219.5	211.067	479.79	1.44193	0	0	up	869
Cluster-32703.0	5.01667	52.3	3.63468	0	0	up	2590
Cluster-33137.1	12.3067	72.47	2.81059	0	0	up	1997
Cluster-33208.0	105.487	197.877	1.20989	0	0	up	4319
Cluster-33312.0	21.5333	104.337	2.51069	0	0	up	1964
Cluster-33351.5	65.4433	174.37	1.67255	0	0	up	3255
Cluster-33369.0	1.29333	493.813	8.75327	0	0	up	1083
Cluster-33518.0	2.25333	36.3733	4.23396	0	0	up	2473
Cluster-33595.0	4.11	76.6033	4.47209	0	0	up	1379
Cluster-33726.0	50.77	120.787	1.48329	0	0	up	4354
Cluster-34041.2	73.42	229.653	1.91174	0	0	up	2645
Cluster-34052.3	4.93333	60.0267	3.86259	0	0	up	1526
Cluster-34077.0	91.5633	173.913	1.17673	0	0	up	2190
Cluster-3412.4	40.01	136.91	2.02753	0	0	up	1800
Cluster-3412.6	45.81	2.74667	-3.81713	0	0	down	3177
Cluster-34139.2	13.16	48.1567	2.10755	0	0	up	6235
Cluster-34309.6	157.887	46.1867	-1.53447	0	0	down	2422
Cluster-34309.7	358.903	145.51	-1.04887	0	0	down	1893
Cluster-34332.0	43.8767	111.72	1.59965	0	0	up	2718
Cluster-34373.5	187.457	76.35	-1.0455	0	0	down	2039
Cluster-34581.0	11.2367	44.7733	2.1684	0	0	up	2490
Cluster-34606.0	335.85	651.667	1.22452	0	0	up	1153
Cluster-34669.0	550.977	1027.8	1.15159	0	0	up	1183
Cluster-34681.0	8.50333	60.97	3.09642	0	0	up	2503
Cluster-34909.10	311.21	122.753	-1.08332	0	0	down	1672
Cluster-34967.10	86.9967	288.377	1.97899	0	0	up	2208
Cluster-35046.0	286.713	845.007	1.81207	0	0	up	1655
Cluster-35179.0	173.267	959.203	2.71886	0	0	up	1468
Cluster-35259.1	18.1533	88.4933	2.48226	0	0	up	5274
Cluster-35384.5	1236.07	3371.39	1.70779	0	0	up	756
Cluster-35427.0	65.93	21.9767	-1.32504	0	0	down	4064
Cluster-35463.2	104.12	18.0067	-2.28144	0	0	down	5937
Cluster-35522.6	142.473	39.6333	-1.59456	0	0	down	1966
Cluster-35873.5	155.937	302.497	1.20776	0	0	up	2093
Cluster-35920.1	255.927	2217.45	3.37205	0	0	up	924
Cluster-35920.3	687.383	1245.91	1.11412	0	0	up	953
Cluster-36001.1	113.24	321.933	1.75773	0	0	up	2149
Cluster-36001.3	79.63	171.073	1.33857	0	0	up	2382
Cluster-36012.0	59.5167	218.113	2.11406	0	0	up	3736
Cluster-36136.0	1888.63	12533.5	2.9716	0	0	up	1472
Cluster-36162.1	51.6033	112.46	1.3751	0	0	up	2512
Cluster-36229.0	21.93	68.7167	1.89834	0	0	up	2734
Cluster-36510.5	157.09	28.8967	-2.19202	0	0	down	2357
Cluster-36697.2	75.22	272.367	2.08648	0	0	up	1763
Cluster-36803.6	17.2733	104.03	2.84089	0	0	up	4698
Cluster-36846.3	4.37	32.4133	3.14377	0	0	up	2839
Cluster-36968.5	147.16	27.7567	-2.15742	0	0	down	1350
Cluster-37120.11	0.996667	340.22	8.67717	0	0	up	3195
Cluster-37407.7	371.19	127.607	-1.28809	0	0	down	1830
Cluster-37575.2	50.9967	151.637	1.82319	0	0	up	2808
Cluster-4030.1	141.203	427.733	1.85015	0	0	up	1375
Cluster-5050.0	76.74	149.213	1.21064	0	0	up	2519
Cluster-5706.0	10.1033	152.457	4.16953	0	0	up	1319
Cluster-6651.10	0.83	75.68	6.72814	0	0	up	6634
Cluster-697.9	28.41	2.32	-3.37199	0	0	down	7084
Cluster-7025.0	561.15	157.38	-1.57906	0	0	down	1092
Cluster-7872.5	314.357	558.02	1.07409	0	0	up	1372
Cluster-8993.1	74.3733	859.097	3.77976	0	0	up	1065
Cluster-10105.0	92.29	166.46	1.10194	7.7384e-307	1.42751e-304	up	2910
Cluster-18001.0	119.703	266.7	1.39951	8.1994e-307	1.50592e-304	up	1291
Cluster-31585.1	69.0567	181.413	1.64652	1.73208e-306	3.16729e-304	up	1677
Cluster-24797.0	18.8833	275.4	4.12667	9.37313e-306	1.70652e-303	up	768
Cluster-29707.0	185.24	60.1633	-1.36986	1.99921e-305	3.62411e-303	down	1561
Cluster-31057.0	53.75	108.627	1.29815	2.38988e-305	4.31362e-303	up	3672
Cluster-4316.1	27.24	126.857	2.47998	3.01229e-305	5.41372e-303	up	848
Cluster-30508.2	210.667	356.303	1.0138	7.66044e-305	1.37086e-302	up	1019
Cluster-18912.0	33.5033	102.647	1.86873	6.64697e-304	1.18443e-301	up	1446
Cluster-28046.4	3.93	65.43	3.98334	7.93646e-302	1.40227e-299	up	1993
Cluster-20255.6	3.38333	34.7467	3.69606	2.48374e-301	4.37002e-299	up	1812
Cluster-18746.1	3.55	25.78	3.11507	5.9818e-301	1.04807e-298	up	3290
Cluster-29491.0	0.94	14.66	4.21639	3.48486e-299	6.08035e-297	up	6089
Cluster-17036.0	30.4133	79.28	1.63691	3.80738e-299	6.61552e-297	up	3428
Cluster-14500.0	112.013	218.483	1.19884	6.65927e-299	1.1523e-296	up	2196
Cluster-32217.0	51.19	0.826667	-5.65362	3.41364e-298	5.88256e-296	down	2632
Cluster-35463.3	40.22	81.6967	1.27193	7.20467e-298	1.23646e-295	up	6023
Cluster-32488.4	12.96	58.19	2.41774	1.31042e-295	2.23976e-293	up	3872
Cluster-16066.0	20.4767	93.6833	2.44758	4.23997e-294	7.21743e-292	up	1395
Cluster-16084.0	236.05	182.643	-1.29472	3.91004e-293	6.62887e-291	down	1542
Cluster-7183.1	129.127	4.18333	-4.72704	3.65785e-291	6.17632e-289	down	1518
Cluster-34642.0	12.6933	76.2467	2.80928	1.51319e-290	2.54476e-288	up	2536
Cluster-11457.0	63.8633	205.113	1.94039	2.89238e-287	4.84473e-285	up	891
Cluster-21005.1	21.2933	74.2433	2.05533	2.09996e-286	3.50342e-284	up	1577
Cluster-29524.0	99.59	195.48	1.2219	9.99411e-286	1.66073e-283	up	2619
Cluster-36127.0	192.223	60.4	-1.41404	7.08785e-285	1.17314e-282	down	1093
Cluster-24432.0	2.71	86.9167	5.32478	4.46933e-284	7.33934e-282	up	965
Cluster-31875.0	1.38667	247.38	7.74234	6.05092e-283	9.89774e-281	up	961
Cluster-19058.0	157.973	279.183	1.07324	4.93885e-282	8.04726e-280	up	2333
Cluster-20186.2	85.8967	150.08	1.12527	6.58121e-282	1.06817e-279	up	2147
Cluster-34052.4	1.81667	41.2533	4.48794	2.55358e-279	4.12862e-277	up	2328
Cluster-36495.0	118.23	218.347	1.11561	1.3529e-278	2.17895e-276	up	3751
Cluster-25382.4	25.0167	70.1633	1.73866	1.57606e-278	2.52865e-276	up	2715
Cluster-27675.3	11.4133	40.23	2.06966	2.32909e-277	3.72254e-275	up	2390
Cluster-35632.0	49.0233	116.63	1.4761	5.277e-276	8.40207e-274	up	3379
Cluster-33265.0	80.7067	19.0133	-1.8592	3.32064e-274	5.26712e-272	down	2033
Cluster-9266.1	5.26667	45.3967	3.39401	4.50957e-274	7.12597e-272	up	1749
Cluster-35089.9	89.5333	206.097	1.46023	2.00202e-273	3.14218e-271	up	864
Cluster-36647.1	39.74	92.6667	1.48239	2.00349e-273	3.14218e-271	up	2596
Cluster-31862.8	24.71	69.63	1.74746	7.79722e-273	1.21831e-270	up	1728
Cluster-33351.2	7.32667	25.9467	2.07579	1.06768e-272	1.66204e-270	up	4938
Cluster-31178.4	345.08	119.993	-1.26776	2.00402e-272	3.10809e-270	down	1045
Cluster-16567.9	87.0367	244.027	1.73649	4.39096e-272	6.78492e-270	up	2622
Cluster-23808.0	53.92	94.46	1.10822	1.83359e-271	2.82284e-269	up	5388
Cluster-35537.4	33.5733	106.013	1.91364	2.08908e-271	3.2044e-269	up	1228
Cluster-33328.6	15.83	36.9267	1.47541	4.65136e-271	7.10859e-269	up	3981
Cluster-26639.5	70.7767	21.1433	-1.49272	5.42461e-271	8.2602e-269	down	2798
Cluster-23021.1	160.777	368.073	1.43744	6.04247e-271	9.16769e-269	up	1660
Cluster-30926.0	33.1433	92.8567	1.74128	1.54805e-270	2.34024e-268	up	3828
Cluster-28453.0	82.4667	147.753	1.0929	3.88444e-270	5.85112e-268	up	2217
Cluster-30020.4	388.857	725.377	1.15566	2.52259e-266	3.78615e-264	up	990
Cluster-1623.25	21.1367	1.38667	-6.48185	9.03214e-265	1.34598e-262	down	5271
Cluster-37396.16	31.0367	89.78	1.78604	1.87888e-264	2.79001e-262	up	1689
Cluster-21606.0	523.57	928.04	1.08204	6.81231e-264	1.00801e-261	up	2905
Cluster-36094.1	10.1433	46.1167	2.44201	2.69739e-263	3.97723e-261	up	1672
Cluster-30249.0	28.3033	120.617	2.30626	2.94451e-261	4.31123e-259	up	2225
Cluster-26801.0	120.423	249.833	1.30574	5.63647e-261	8.22394e-259	up	1462
Cluster-31323.0	146.277	58.5933	-1.07007	1.90674e-260	2.77239e-258	down	2125
Cluster-16843.0	289.317	859.647	1.83934	7.4473e-260	1.07909e-257	up	525
Cluster-22467.0	23.23	54.6067	1.48935	1.40797e-259	2.02608e-257	up	2938
Cluster-31144.1	5.06333	41.0233	3.27661	4.29787e-258	6.16347e-256	up	1553
Cluster-7621.0	74.6	146.97	1.23222	1.80991e-257	2.58669e-255	up	1216
Cluster-14235.0	120.743	50.07	-1.0171	1.5776e-254	2.23939e-252	down	2377
Cluster-18972.0	58.9967	148.26	1.57878	2.80792e-254	3.97235e-252	up	1220
Cluster-37836.4	26.0967	4.56667	-2.26402	2.9294e-254	4.13026e-252	down	3813
Cluster-19820.0	80.9067	19.7967	-1.77828	5.27146e-254	7.40746e-252	down	1638
Cluster-26774.2	1.90667	26.1167	4.03404	1.06587e-253	1.49275e-251	up	2111
Cluster-23638.1	23.4367	113.947	2.53412	5.18594e-253	7.2387e-251	up	1355
Cluster-36374.0	133.77	375.89	1.7524	4.30956e-252	5.99544e-250	up	690
Cluster-14717.0	47.67	169.67	2.08852	4.82498e-252	6.69027e-250	up	832
Cluster-22936.8	19.2133	44.66	1.46822	2.40007e-251	3.31693e-249	up	2636
Cluster-12196.0	4.01333	33.81	3.37692	1.32303e-249	1.82243e-247	up	1828
Cluster-23817.1	41.5	72.1867	1.01628	2.44041e-249	3.35056e-247	up	2909
Cluster-22314.0	8.67667	36.81	2.33744	7.14633e-249	9.74764e-247	up	2730
Cluster-35206.0	145.94	279.563	1.20619	8.76204e-249	1.19127e-246	up	1892
Cluster-22428.0	123.283	46.1167	-1.16029	1.21537e-248	1.64704e-246	down	2897
Cluster-26069.1	72.3733	4.15667	-3.87329	1.49674e-248	2.0218e-246	down	1166
Cluster-478.11	9.12333	0.496667	-3.61441	1.13968e-246	1.53453e-244	down	8725
Cluster-12253.0	419.12	811.783	1.21165	1.67516e-246	2.24832e-244	up	855
Cluster-30923.18	17.8067	56.3933	1.91792	1.82914e-246	2.44714e-244	up	1470
Cluster-25410.4	280.18	484.5	1.04124	5.01543e-246	6.68857e-244	up	2940
Cluster-21350.0	244.89	512.903	1.3192	1.09113e-245	1.44591e-243	up	1093
Cluster-29818.3	43.4733	13.92	-3.20711	1.18413e-245	1.56422e-243	down	2274
Cluster-21642.0	36.4733	102.68	1.73033	4.89638e-245	6.44767e-243	up	3538
Cluster-29322.8	20.9767	50.8367	1.52875	5.73702e-245	7.53096e-243	up	2481
Cluster-21688.0	207.397	413.39	1.24942	8.81532e-245	1.15357e-242	up	1245
Cluster-14201.0	596.167	1230.79	1.30529	3.80512e-244	4.96384e-242	up	760
Cluster-18806.1	294.943	651.097	1.39576	4.48995e-243	5.83903e-241	up	1182
Cluster-30288.0	427.617	162.35	-1.14073	9.30541e-243	1.20639e-240	down	914
Cluster-34062.11	2.60333	20.7433	3.24952	8.39673e-242	1.07857e-239	up	3277
Cluster-13735.0	30.6	72.01	1.48735	1.10211e-241	1.41134e-239	up	1733
Cluster-22077.2	0.873333	42.2767	5.88153	1.76046e-241	2.24754e-239	up	1808
Cluster-23219.0	6.12667	40.9133	2.99625	9.60562e-241	1.2226e-238	up	1740
Cluster-36001.0	13.3033	42.5	1.9271	1.6515e-237	2.08303e-235	up	2471
Cluster-32488.5	3.62333	11.44	1.90951	2.16595e-237	2.72369e-235	up	9667
Cluster-37141.28	23.39	53.8967	1.45539	2.21987e-237	2.78315e-235	up	2745
Cluster-11708.0	109.523	28.83	-1.67273	3.09102e-237	3.86378e-235	down	1567
Cluster-17001.0	133.373	25.7167	-2.11803	1.3508e-235	1.67351e-233	down	867
Cluster-35847.2	36.8667	92	1.57212	2.6328e-235	3.25216e-233	up	1671
Cluster-31824.0	59.0667	19.1433	-1.37568	3.59501e-235	4.42768e-233	down	3371
Cluster-13860.2	42.15	90.66	1.35771	1.80796e-234	2.22019e-232	up	1564
Cluster-18439.0	28.1767	79.6967	1.75213	2.51066e-234	3.07409e-232	up	1872
Cluster-23922.2	113.973	14.4667	-2.72106	7.89571e-234	9.63944e-232	down	869
Cluster-23640.1	16.9133	42.8567	1.60906	1.80811e-233	2.201e-231	up	2802
Cluster-33622.2	30.8667	0.436667	-5.94013	3.14267e-233	3.81447e-231	down	2876
Cluster-19517.0	8.80667	26.18	1.7994	5.49295e-233	6.64789e-231	up	3052
Cluster-21302.0	6.52667	27.81	2.3375	3.69606e-230	4.43474e-228	up	3943
Cluster-32221.6	72.6867	135.55	1.15289	1.28518e-229	1.53763e-227	up	1266
Cluster-5279.0	1.05667	186.553	7.72497	1.38991e-229	1.65819e-227	up	863
Cluster-20989.6	28.1867	70.71	1.58628	2.6217e-229	3.11886e-227	up	2421
Cluster-15980.0	81.22	221.917	1.70109	2.67393e-229	3.17198e-227	up	966
Cluster-32229.2	34.3933	64.21	1.16036	3.17639e-229	3.75739e-227	up	3709
Cluster-27220.0	13.1867	32.3833	1.54643	3.7944e-229	4.47579e-227	up	3227
Cluster-10289.0	52.5433	5.37667	-3.03378	7.49231e-229	8.81293e-227	down	1398
Cluster-16649.0	106.857	41.7	-1.1065	2.01866e-228	2.36782e-226	down	2567
Cluster-33515.2	80.4967	26.8733	-1.33194	3.67781e-228	4.28992e-226	down	2119
Cluster-25660.1	58.2333	128.03	1.38801	3.98734e-228	4.63805e-226	up	2568
Cluster-29692.0	30.7367	77.4933	1.59097	1.30536e-227	1.51418e-225	up	1609
Cluster-20095.4	121.083	33.28	-1.61158	1.36771e-227	1.58212e-225	down	1248
Cluster-15210.5	26.3167	105.533	2.25826	5.34237e-227	6.16285e-225	up	1918
Cluster-19036.2	24.8933	69.17	1.72476	4.3705e-226	5.02787e-224	up	3950
Cluster-32611.1	19.2933	111.493	2.78882	1.41751e-225	1.62626e-223	up	1101
Cluster-15832.20	93.8667	343.587	2.12195	7.38429e-225	8.42553e-223	up	4861
Cluster-11525.1	3.06	64.3867	4.65062	1.10002e-224	1.25173e-222	up	913
Cluster-25736.5	26.45	105.217	2.24868	2.58098e-224	2.92896e-222	up	922
Cluster-37102.0	6.37667	212.237	5.29756	5.03168e-224	5.69464e-222	up	1916
Cluster-15650.0	71.1267	159.197	1.41481	6.6681e-223	7.52633e-221	up	1817
Cluster-32874.0	3.52333	65.2933	4.47703	3.09561e-222	3.48464e-220	up	968
Cluster-31894.0	49.4633	85.1167	1.05007	4.56884e-222	5.12922e-220	up	3989
Cluster-20661.0	47.9067	100.127	1.31927	6.24653e-222	6.99394e-220	up	1474
Cluster-33292.0	65.1933	115.043	1.06987	3.06645e-221	3.4242e-219	up	2495
Cluster-17243.0	27.4867	69.73	1.59461	5.96357e-220	6.62399e-218	up	1890
Cluster-19739.0	39.59	109.443	1.72309	6.51066e-220	7.21254e-218	up	937
Cluster-31532.2	30.97	61.7	1.24482	7.78485e-219	8.60133e-217	up	3250
Cluster-22502.0	385.13	119.2	-1.4367	1.68681e-218	1.85881e-216	down	1260
Cluster-2474.1	23.68	53.5733	1.38952	1.8263e-218	2.00725e-216	up	2834
Cluster-8364.2	109.227	17.97	-2.35073	1.6161e-217	1.77157e-215	down	1018
Cluster-19526.0	87.72	190.103	1.368	7.173e-216	7.82212e-214	up	1951
Cluster-34480.6	80.2067	23.54	-1.51557	2.22144e-215	2.41618e-213	down	2832
Cluster-7872.1	688.913	1199.46	1.05884	6.34318e-215	6.86358e-213	up	778
Cluster-35537.8	29.9533	107.977	2.10711	2.50152e-214	2.69977e-212	up	1075
Cluster-25455.1	36.3633	85.83	1.48898	4.76741e-213	5.13201e-211	up	3486
Cluster-35384.3	1090.06	1.19	-9.65921	1.04181e-212	1.11861e-210	down	619
Cluster-29438.0	18.9333	82.1	2.37022	3.09864e-212	3.31856e-210	up	1229
Cluster-37372.3	70.2933	192.53	1.78715	6.83772e-212	7.30433e-210	up	1229
Cluster-23616.2	42.7233	85.7567	1.25895	1.29389e-211	1.37867e-209	up	1564
Cluster-25080.0	17.07	67.28	2.23305	1.74287e-211	1.85236e-209	up	1302
Cluster-14926.0	8.67333	43.7667	2.58711	5.67852e-211	6.01995e-209	up	1804
Cluster-31048.0	51.77	131.11	1.59299	1.36004e-210	1.43817e-208	up	1840
Cluster-28990.2	0.543333	24.05	5.72939	2.34294e-210	2.4713e-208	up	2347
Cluster-24435.0	56.6767	105.28	1.14358	2.50258e-210	2.63306e-208	up	2030
Cluster-18310.2	29.19	57.23	1.20911	5.31823e-210	5.58148e-208	up	3339
Cluster-16996.0	12.54	126.21	3.59514	1.59804e-209	1.67295e-207	up	597
Cluster-3289.0	238.733	73.0267	-1.4535	1.63184e-209	1.70408e-207	down	956
Cluster-21380.0	39.29	126.127	1.93454	2.64541e-209	2.75563e-207	up	1533
Cluster-17930.0	0.22	139.417	9.58317	4.27059e-209	4.41558e-207	up	1786
Cluster-5850.0	2231.13	4813.59	1.36252	5.24608e-209	5.41083e-207	up	1499
Cluster-32647.3	23.8333	64.3367	1.68214	1.1165e-207	1.14592e-205	up	1620
Cluster-36681.0	117.577	33.75	-1.5492	1.90514e-207	1.95056e-205	down	3072
Cluster-15592.6	31.3367	78.33	1.57523	5.22377e-207	5.33526e-205	up	3090
Cluster-12606.0	29.9467	77.7233	1.6302	9.36292e-207	9.53947e-205	up	1208
Cluster-35028.0	34.2533	69.7967	1.27316	2.78626e-205	2.81144e-203	up	2215
Cluster-19857.0	27.6733	116.853	2.35492	3.39082e-205	3.41323e-203	up	912
Cluster-28904.0	0.973333	9.87	3.60547	1.80759e-204	1.81518e-202	up	3698
Cluster-26276.0	13.5767	58.8467	2.36116	2.38693e-204	2.39121e-202	up	1665
Cluster-17520.1	44.9767	120.03	1.66967	1.81905e-203	1.81364e-201	up	1580
Cluster-18128.0	44.87	127.657	1.76564	2.3529e-203	2.34032e-201	up	858
Cluster-33825.3	47.0733	90.1933	1.18922	9.53724e-203	9.46379e-201	up	2120
Cluster-5312.0	29.49	0.396667	-5.97586	2.64608e-202	2.6195e-200	down	2609
Cluster-12472.0	37.5867	65.9833	1.06334	5.17058e-202	5.10656e-200	up	2373
Cluster-17287.0	0.746667	121.303	7.56747	6.73387e-202	6.63484e-200	up	1411
Cluster-33137.8	1.09333	24.3433	4.72441	3.02851e-201	2.97697e-199	up	1953
Cluster-17903.0	51.3167	103.13	1.2417	3.54153e-201	3.47311e-199	up	1559
Cluster-23638.0	23.79	75.2233	1.91563	4.07152e-201	3.98353e-199	up	1128
Cluster-34077.6	15	27.02	1.09935	5.38471e-201	5.25605e-199	up	4815
Cluster-14549.0	13.9133	33.9167	1.53944	1.76979e-200	1.72348e-198	up	5237
Cluster-34426.0	16.4833	42.5733	1.70251	3.77742e-200	3.67006e-198	up	3799
Cluster-4315.0	7.83667	36.0167	2.45195	6.16596e-200	5.97684e-198	up	2378
Cluster-30154.1	2.79667	22.3267	3.24799	9.05771e-200	8.75963e-198	up	2200
Cluster-32609.0	118.147	45.1167	-1.136	9.12235e-200	8.80181e-198	down	1979
Cluster-25614.0	26.3733	125.447	2.51362	1.56446e-199	1.50602e-197	up	931
Cluster-15647.0	36.2267	66.88	1.1323	3.32095e-199	3.18226e-197	up	3104
Cluster-36463.3	25.3933	45.3633	1.08829	1.63947e-198	1.56385e-196	up	4798
Cluster-25456.0	119.557	49.38	-1.02381	3.53037e-197	3.35987e-195	down	4436
Cluster-28412.0	39.6533	66.2667	1.04526	3.62692e-197	3.44392e-195	up	5583
Cluster-31862.3	14.5333	38.78	1.66657	1.65076e-196	1.56392e-194	up	3730
Cluster-31346.5	11.8867	56.7633	2.51022	2.12941e-195	2.00831e-193	up	1116
Cluster-17806.0	6.67667	33.2767	2.56851	2.26664e-195	2.13294e-193	up	1951
Cluster-34567.3	11.62	63.3733	2.70595	7.43748e-195	6.96744e-193	up	979
Cluster-31075.14	0.636667	18.4033	5.12461	1.50011e-194	1.40217e-192	up	2588
Cluster-31463.4	44.56	108.243	1.53344	3.1902e-194	2.96207e-192	up	1841
Cluster-18900.0	98.5067	227.677	1.46133	5.87858e-194	5.44614e-192	up	1862
Cluster-27810.1	49.1433	87.4567	1.12359	8.20558e-194	7.58518e-192	up	3509
Cluster-19409.3	8.16	20.9833	1.61297	1.19986e-193	1.1067e-191	up	3841
Cluster-33042.0	70.2667	11.5167	-4.87006	2.02187e-193	1.86079e-191	down	1300
Cluster-27204.0	109.487	44.02	-1.06487	4.75155e-193	4.3634e-191	down	1921
Cluster-24695.0	631.487	1075.5	1.02393	1.08511e-192	9.9429e-191	up	1564
Cluster-30900.1	59.3467	227.87	2.20297	7.74679e-192	7.0829e-190	up	631
Cluster-7872.3	178.187	343.967	1.20919	3.13712e-191	2.8558e-189	up	2120
Cluster-26521.0	11.5233	32.75	1.77111	3.53779e-191	3.21356e-189	up	2335
Cluster-26776.4	49.3967	128.557	1.61885	7.45758e-188	6.71583e-186	up	2782
Cluster-30264.5	22.7433	6.65667	-1.523	9.129e-188	8.20337e-186	down	4424
Cluster-27178.0	36.6867	70.8867	1.21927	1.07601e-187	9.64839e-186	up	4500
Cluster-27997.14	42.4067	9.77333	-1.86671	2.48696e-187	2.22525e-185	down	2448
Cluster-20465.1	231.02	451.317	1.21731	3.30123e-186	2.94752e-184	up	2957
Cluster-30496.11	2.85667	34.54	3.84923	2.11859e-185	1.88357e-183	up	1328
Cluster-32099.1	25.8867	1.53333	-3.84085	2.18834e-185	1.94146e-183	down	2104
Cluster-35652.5	129	41.33	-1.36603	5.20527e-185	4.60826e-183	down	1264
Cluster-25794.4	38.12	134.39	2.0735	5.50602e-185	4.86424e-183	up	1049
Cluster-17742.0	10.5633	31.0933	1.80875	1.47987e-184	1.29915e-182	up	2959
Cluster-32981.3	26.08	83.94	1.93965	5.85286e-184	5.12738e-182	up	1640
Cluster-26644.0	10.9867	1.06	-3.13265	1.01067e-183	8.83544e-182	down	4809
Cluster-7900.0	65.0033	20.6733	-1.40088	1.56298e-183	1.36354e-181	down	1892
Cluster-32027.0	31.49	53.3633	1.01372	3.47697e-183	3.02699e-181	up	3993
Cluster-18796.1	76.4833	21.6433	-1.57183	6.11741e-183	5.31466e-181	down	1896
Cluster-32136.0	0.24	10.4167	5.71581	6.99679e-183	6.06606e-181	up	5122
Cluster-26913.0	19.3867	79.0667	2.28412	3.79448e-182	3.26942e-180	up	974
Cluster-19712.0	4.74667	37.28	3.22784	5.93934e-182	5.10698e-180	up	1505
Cluster-26904.0	50.3967	14.46	-1.57826	5.56124e-181	4.76231e-179	down	3197
Cluster-12869.7	1.73667	82.6433	5.84464	1.32e-180	1.12806e-178	up	1028
Cluster-31838.7	34.4767	68.3	1.30725	1.57323e-180	1.34173e-178	up	1784
Cluster-26774.5	1.28333	11.82	3.51415	5.29847e-180	4.50048e-178	up	8172
Cluster-24062.2	29.7	5.79	-2.20775	9.19312e-180	7.77701e-178	down	4086
Cluster-37213.13	16.54	34.48	1.29626	1.0006e-179	8.44765e-178	up	2899
Cluster-28904.1	21.77	45.13	1.30201	1.02483e-179	8.63475e-178	up	2978
Cluster-6688.0	21.05	46.6733	1.39475	1.32287e-179	1.11235e-177	up	2414
Cluster-35092.1	47.1933	164.573	2.03859	2.18609e-179	1.83452e-177	up	1123
Cluster-19075.0	298.283	546.773	1.12665	1.43326e-178	1.20036e-176	up	1803
Cluster-18796.0	69.5767	20.7633	-1.49195	2.62286e-177	2.18789e-175	down	1656
Cluster-11525.0	275.073	470.093	1.0275	5.4594e-177	4.53596e-175	up	1220
Cluster-29723.0	47.07	7.83667	-2.33616	8.40561e-177	6.97e-175	down	1786
Cluster-24196.0	60.7833	145.883	1.51377	9.30419e-177	7.69986e-175	up	3477
Cluster-22689.0	60.24	173.237	1.77475	3.16284e-176	2.6123e-174	up	895
Cluster-23686.0	0.72	21.2233	5.10149	3.2727e-176	2.69772e-174	up	2458
Cluster-28601.8	1.33	9.30667	3.05862	8.12395e-176	6.6704e-174	up	4887
Cluster-15349.0	53.5733	15.7067	-1.51968	8.56854e-176	7.02168e-174	down	2693
Cluster-32473.0	42.62	76.54	1.12965	8.97955e-176	7.34411e-174	up	4527
Cluster-27291.0	143.863	32.1733	-1.91557	9.34011e-176	7.62411e-174	down	1183
Cluster-16794.1	29.9933	0.793333	-5.03359	2.19582e-175	1.78891e-173	down	1823
Cluster-33308.2	17.43	38.05	1.34632	4.65462e-175	3.7847e-173	up	3632
Cluster-15874.0	28.9	89.27	1.88388	2.81895e-174	2.28767e-172	up	922
Cluster-23741.2	58.05	4.83	-3.33844	3.1305e-174	2.53558e-172	down	1099
Cluster-15614.0	47.2167	97.6733	1.30248	3.71409e-174	3.00246e-172	up	1334
Cluster-27519.0	1652.42	667.85	-1.05492	3.88652e-174	3.1358e-172	down	2129
Cluster-22575.1	54.3033	103.317	1.17957	7.81274e-174	6.29151e-172	up	2774
Cluster-24023.0	3.92333	18.8267	2.51352	1.22546e-173	9.84956e-172	up	2413
Cluster-18692.0	11.14	54.19	2.5339	6.70742e-173	5.37042e-171	up	2205
Cluster-20486.1	37.5467	101.86	1.69044	7.96652e-173	6.36638e-171	up	4674
Cluster-21798.7	7.40333	28.8	2.2134	1.83085e-172	1.45755e-170	up	1677
Cluster-31900.0	7.73333	18.9	1.5399	2.4584e-172	1.95342e-170	up	4484
Cluster-29586.0	112.057	313.843	1.75178	1.05931e-171	8.40124e-170	up	563
Cluster-33667.3	143.877	47.2133	-1.36081	3.44213e-171	2.71961e-169	down	2306
Cluster-13785.0	46.4033	127.823	1.71758	8.67303e-171	6.83961e-169	up	1003
Cluster-22038.0	32.9433	73.44	1.40858	1.08972e-170	8.57743e-169	up	2161
Cluster-33359.0	160.113	51.7667	-1.37569	4.29749e-169	3.37631e-167	down	1088
Cluster-19317.0	42.8933	78.85	1.13126	9.93238e-169	7.78874e-167	up	1632
Cluster-21911.0	31.46	53.5167	1.03078	4.89156e-168	3.82867e-166	up	3298
Cluster-12017.0	2.29667	16.0967	3.05884	5.5463e-168	4.33305e-166	up	2588
Cluster-31412.0	0.486667	54.2833	7.06627	6.16251e-168	4.8055e-166	up	1344
Cluster-32208.3	52.5667	115.373	1.38744	8.11028e-168	6.3126e-166	up	1632
Cluster-3842.0	41.0067	86.1567	1.32471	1.69799e-167	1.31673e-165	up	1413
Cluster-26469.7	83.3267	13.7033	-2.34512	6.00316e-166	4.62951e-164	down	949
Cluster-32634.3	159.97	54.7767	-1.29385	5.27079e-165	4.05725e-163	down	1535
Cluster-29681.0	13.1067	31.5167	1.46459	6.54084e-164	5.01644e-162	up	3301
Cluster-22077.4	0.28	36.4867	7.30056	7.48223e-163	5.72794e-161	up	2024
Cluster-18467.0	33.1167	69.19	1.31452	1.00295e-162	7.66394e-161	up	2273
Cluster-19447.2	0.9	38.3933	5.68535	5.29008e-162	4.02767e-160	up	1970
Cluster-18889.2	1.34667	47.3133	5.30012	2.19681e-161	1.66651e-159	up	2015
Cluster-28268.0	7.08667	31.0667	2.3839	3.84929e-161	2.91481e-159	up	1696
Cluster-16983.0	0.96	15.8033	4.27994	4.8719e-161	3.68251e-159	up	2481
Cluster-28078.0	103.38	42.37	-1.03436	3.81743e-160	2.88027e-158	down	1726
Cluster-13092.0	74.8667	138.703	1.1437	6.61289e-160	4.98048e-158	up	1203
Cluster-17920.1	45.91	17.8033	-1.11793	7.7268e-159	5.80897e-157	down	4656
Cluster-31772.0	20.7133	44.0867	1.39851	1.78075e-158	1.33636e-156	up	4026
Cluster-19183.0	14.67	2.09	-2.56448	2.93863e-158	2.20134e-156	down	3474
Cluster-31278.1	0.633333	25.1267	5.60528	3.39737e-158	2.54044e-156	up	1775
Cluster-33961.0	2.79333	73.0433	4.96819	1.05751e-157	7.89365e-156	up	810
Cluster-30788.2	146.847	296.29	1.24142	2.69829e-157	2.01052e-155	up	1750
Cluster-10300.0	7.91	71.37	3.43193	4.26923e-157	3.16975e-155	up	833
Cluster-34377.5	152.97	34.64	-1.88643	1.0058e-156	7.45449e-155	down	1443
Cluster-37502.1	5.73	35.62	2.88999	7.13447e-156	5.26906e-154	up	1962
Cluster-27159.0	48.9567	9.94667	-2.05159	1.80711e-155	1.32993e-153	down	1663
Cluster-36963.5	4.46	26.47	2.70861	2.03642e-155	1.49606e-153	up	2357
Cluster-35666.0	0.55	17.7833	5.27287	2.19082e-155	1.60666e-153	up	2227
Cluster-25455.6	2.68333	20	2.79116	3.25196e-155	2.3807e-153	up	2549
Cluster-14382.0	25.1267	131.353	2.5875	7.07381e-155	5.16056e-153	up	879
Cluster-33400.0	113.673	228.163	1.26074	7.79073e-155	5.67368e-153	up	1232
Cluster-33804.11	29.2633	5.29	-2.21844	1.25669e-154	9.13611e-153	down	2335
Cluster-17939.0	98.1033	200.467	1.26271	3.63053e-154	2.63481e-152	up	2801
Cluster-23741.3	260.283	75.1667	-1.48603	4.03562e-154	2.92373e-152	down	1332
Cluster-38001.0	43.17	10.9167	-2.02249	4.88482e-154	3.53285e-152	down	1851
Cluster-15531.0	28.3067	86.77	1.87241	7.08561e-154	5.10688e-152	up	960
Cluster-9414.0	25.23	45.8733	1.11348	1.1246e-153	8.09151e-152	up	3084
Cluster-6262.0	130.953	50.3633	-1.12443	2.76969e-153	1.98938e-151	down	1185
Cluster-12626.0	86.5	25.58	-1.51752	3.75711e-153	2.69399e-151	down	1484
Cluster-13065.0	22.7167	81.94	2.09944	1.82191e-152	1.30192e-150	up	1255
Cluster-20989.9	130.597	387.017	1.83062	2.03848e-152	1.4542e-150	up	685
Cluster-17222.7	19.7267	50.6167	2.00673	2.13848e-152	1.52294e-150	up	4069
Cluster-19991.0	83.38	168.067	1.26474	6.37729e-152	4.53394e-150	up	1459
Cluster-31987.5	246.447	80.7033	-1.35792	9.24316e-152	6.54919e-150	down	1444
Cluster-21798.6	48.81	104.177	1.349	1.02586e-151	7.25638e-150	up	1010
Cluster-14213.0	32.2933	83.0067	1.6149	1.29811e-151	9.16664e-150	up	1671
Cluster-11525.2	216.957	385.66	1.08358	1.80236e-151	1.2706e-149	up	1370
Cluster-21089.5	384.373	131.553	-1.29258	3.06346e-151	2.15601e-149	down	1177
Cluster-33392.0	68.54	20.9633	-1.45685	8.08833e-151	5.68287e-149	down	1884
Cluster-25833.0	2.43	30.4367	3.81163	1.08108e-150	7.58292e-149	up	1464
Cluster-17546.1	30.08	68.2433	1.43219	5.82045e-150	4.07577e-148	up	1326
Cluster-19785.0	437.223	841.867	1.20519	6.61399e-150	4.62372e-148	up	742
Cluster-7072.0	3.12	82.51	4.98662	8.64046e-150	6.03032e-148	up	687
Cluster-36803.3	14.4467	37.4933	1.62643	1.03495e-149	7.21105e-148	up	4724
Cluster-37464.10	56.3733	8.3	-2.51442	1.18357e-149	8.23285e-148	down	1348
Cluster-35322.0	19.2	61.0967	1.92431	1.29236e-149	8.97471e-148	up	1111
Cluster-18503.0	7.47	21.7567	1.77163	2.08711e-149	1.44698e-147	up	2459
Cluster-588.15	90.9033	17.2867	-2.14249	6.1758e-149	4.27457e-147	down	943
Cluster-37016.3	16.4067	4.14	-1.7365	6.82694e-149	4.71746e-147	down	4197
Cluster-29258.6	298.257	528.217	1.07678	7.8907e-149	5.44354e-147	up	1879
Cluster-23605.0	7.51333	26.23	2.04638	9.61569e-149	6.62265e-147	up	2762
Cluster-18206.0	76.8633	129.517	1.00496	1.32398e-148	9.10373e-147	up	1763
Cluster-31121.2	8.61333	53.28	2.88775	1.43952e-148	9.88195e-147	up	941
Cluster-26675.0	25.39	0.336667	-6.05821	2.35613e-148	1.61478e-146	down	2260
Cluster-30987.0	152.997	300.35	1.22789	2.50521e-147	1.70578e-145	up	3084
Cluster-25876.0	1.47333	6.79667	2.46794	2.51771e-147	1.71151e-145	up	8429
Cluster-20840.0	76.3833	177.527	1.54892	2.55186e-147	1.73191e-145	up	669
Cluster-35974.0	1.15333	26.65	4.85014	2.96286e-147	2.0076e-145	up	1448
Cluster-9985.2	13.07	22.4967	1.03388	3.21871e-147	2.17744e-145	up	5191
Cluster-26241.0	64.23	22.3133	-1.26548	4.08993e-147	2.7579e-145	down	2322
Cluster-26111.0	43.47	74.7667	1.0027	7.60532e-147	5.11192e-145	up	4172
Cluster-34077.1	9.84333	26.08	1.65638	1.68207e-146	1.12879e-144	up	3541
Cluster-17028.4	0.516667	26.92	5.96719	4.70398e-146	3.14663e-144	up	2201
Cluster-15881.0	134.043	41.58	-1.43254	5.53498e-146	3.69661e-144	down	940
Cluster-23189.0	14.6433	36.3833	1.56738	1.11271e-145	7.41954e-144	up	2659
Cluster-16750.0	7.26667	50.8233	3.06158	1.30973e-145	8.71936e-144	up	1018
Cluster-29564.0	61.33	226.297	2.14672	1.48242e-145	9.85337e-144	up	666
Cluster-36827.3	21.5567	68.3167	1.91824	3.65929e-145	2.42841e-143	up	1092
Cluster-23238.0	14.8733	3.24	-1.95066	5.44847e-145	3.61004e-143	down	3783
Cluster-30364.0	46.0467	17.21	-1.17216	1.09993e-144	7.27641e-143	down	4520
Cluster-32646.0	0.75	28.5033	5.50612	1.62633e-144	1.07417e-142	up	2151
Cluster-33111.2	0.666667	7.54333	3.75414	2.16037e-144	1.42465e-142	up	4014
Cluster-33328.9	59.3067	126.57	1.35743	2.30516e-144	1.51775e-142	up	1186
Cluster-34456.0	113.917	42.3267	-1.17419	1.227e-143	8.05337e-142	down	1675
Cluster-4401.0	30.9133	6.05	-2.05951	3.10374e-143	2.03395e-141	down	1951
Cluster-30310.0	41.2	72.3633	1.06847	4.31271e-143	2.82179e-141	up	2435
Cluster-6909.2	48.16	20.21	-1.00277	7.74038e-143	5.05661e-141	down	4074
Cluster-23520.0	0.73	26.56	5.43781	1.03053e-142	6.72174e-141	up	2172
Cluster-22541.0	6.32	35.5333	2.72632	1.28024e-142	8.33748e-141	up	1260
Cluster-36803.1	2.21333	11.54	2.63537	1.33499e-142	8.68051e-141	up	6290
Cluster-23753.1	54.6267	12.54	-1.8639	2.25935e-142	1.46683e-140	down	1937
Cluster-31407.0	36.0567	8.09333	-1.90804	2.29376e-142	1.48686e-140	down	2167
Cluster-9653.0	4.19667	14.3567	2.02392	3.53931e-142	2.28717e-140	up	3401
Cluster-20974.2	290.483	98.5133	-1.31228	3.62948e-142	2.34183e-140	down	1755
Cluster-6757.0	15.1067	43.86	1.79031	4.12652e-142	2.65843e-140	up	1790
Cluster-22586.0	83.69	162.793	1.07517	1.04341e-141	6.71165e-140	up	1294
Cluster-31178.7	123.017	1.1	-6.56601	1.34239e-141	8.62155e-140	down	2384
Cluster-13461.0	307.563	645.99	1.32171	1.53043e-141	9.81421e-140	up	3332
Cluster-36304.0	67.5267	128.997	1.37992	4.91161e-141	3.13527e-139	up	1195
Cluster-25079.0	85.8633	159.46	1.14875	9.75431e-141	6.21708e-139	up	1003
Cluster-31646.0	2.37667	10.06	2.33056	1.42231e-140	9.05152e-139	up	3660
Cluster-8364.1	528.87	175.6	-1.33555	1.68019e-140	1.06765e-138	down	1187
Cluster-19734.0	61.7233	106.9	1.04445	1.8505e-140	1.17409e-138	up	1580
Cluster-22575.2	12.96	54.6933	1.84336	2.30422e-140	1.45975e-138	up	2076
Cluster-18024.0	13.04	33.08	1.59889	2.9046e-140	1.83731e-138	up	1903
Cluster-34909.3	38.1533	6.81	-2.23959	3.58795e-140	2.26614e-138	down	2173
Cluster-6454.0	0.376667	29.9367	6.55693	1.0092e-139	6.34541e-138	up	1616
Cluster-2726.6	0.466667	6.92333	4.16865	1.57948e-139	9.90133e-138	up	3894
Cluster-6092.0	0.576667	20.8167	5.43134	1.96846e-139	1.23212e-137	up	1850
Cluster-25154.0	2.79667	30.4167	3.67074	2.27945e-139	1.42465e-137	up	1431
Cluster-33432.0	12.32	35.5733	1.77236	2.8391e-139	1.7718e-137	up	1690
Cluster-23875.1	0.58	31.05	5.94409	9.08629e-139	5.66203e-137	up	1477
Cluster-5955.1	0.22	3.74	4.25523	1.07662e-138	6.69886e-137	up	8004
Cluster-23105.0	20.77	38.3233	1.14801	1.10032e-138	6.8362e-137	up	4055
Cluster-13628.4	0.906667	6.95333	3.15994	2.34761e-138	1.45639e-136	up	7908
Cluster-34691.3	4.5	47.7567	3.67789	2.76809e-138	1.7147e-136	up	854
Cluster-26330.0	27.4033	0.223333	-6.7925	3.23629e-138	2.00177e-136	down	2950
Cluster-6648.0	75.63	25.0367	-1.32895	3.53003e-138	2.17703e-136	down	1310
Cluster-12841.0	12.6333	47.2533	2.15495	9.67321e-138	5.95685e-136	up	2037
Cluster-31971.0	37.1133	78.4333	1.33224	1.2392e-137	7.6199e-136	up	1542
Cluster-31277.0	87.6033	31.41	-1.18849	2.33836e-137	1.43576e-135	down	3907
Cluster-28332.0	31.2233	8.33333	-1.63821	3.1042e-137	1.9032e-135	down	3875
Cluster-22931.0	20.5267	1.22	-3.79986	3.16602e-137	1.93826e-135	down	1922
Cluster-29715.1	13.6233	33.7667	1.56003	3.82038e-137	2.33545e-135	up	2542
Cluster-17099.0	232.927	430.49	1.14622	5.81603e-137	3.55024e-135	up	1083
Cluster-32796.3	67.52	28.3333	-1.00293	1.00298e-136	6.09578e-135	down	4352
Cluster-26382.2	48.7867	83.3633	1.0256	1.23742e-136	7.50972e-135	up	1499
Cluster-17199.0	0.903333	46.42	5.94314	2.2433e-136	1.35945e-134	up	2909
Cluster-6141.0	1.67333	63.6067	5.50617	2.98175e-136	1.80175e-134	up	975
Cluster-14529.4	73.15	138.93	1.18105	3.29843e-136	1.99023e-134	up	2086
Cluster-21217.0	71.8333	21.8	-1.46707	3.4063e-136	2.05236e-134	down	1490
Cluster-23361.0	43.2867	13.26	-1.45395	4.73772e-136	2.85046e-134	down	2696
Cluster-34378.0	116.503	32.3633	-1.59322	5.36192e-136	3.22138e-134	down	1147
Cluster-23922.3	3.30667	66.3767	4.60038	6.64588e-136	3.98705e-134	up	894
Cluster-35384.1	2249.99	4.22	-8.81682	1.20579e-135	7.22355e-134	down	754
Cluster-37375.1	6.03	159.647	5.23999	2.41639e-135	1.44552e-133	up	554
Cluster-18359.0	20.2233	38.3567	1.17408	5.3932e-135	3.22169e-133	up	2670
Cluster-28328.1	0.323333	17.89	6.0118	5.83232e-135	3.47903e-133	up	2615
Cluster-29836.3	8.7	39.5067	2.43342	9.93964e-135	5.92066e-133	up	4360
Cluster-33668.5	0.616667	13.0133	4.66692	1.87764e-134	1.11369e-132	up	3619
Cluster-28476.0	4.75667	11.0267	1.46314	2.2271e-134	1.31723e-132	up	5464
Cluster-31353.14	5313.7	1532.65	-1.51761	6.09572e-134	3.58509e-132	down	455
Cluster-34635.2	21.6633	49.5033	1.44433	1.70948e-133	1.00258e-131	up	2696
Cluster-18443.0	22.6033	46.0067	1.27563	1.95909e-133	1.14737e-131	up	6298
Cluster-34223.0	15.0267	1.35667	-3.22767	2.22885e-133	1.30354e-131	down	3542
Cluster-35874.2	11.9167	22.4233	1.20533	5.55885e-133	3.24654e-131	up	5286
Cluster-13434.0	237.767	98.2267	-1.02543	1.14183e-132	6.65935e-131	down	1176
Cluster-31137.0	95.1	161.173	1.01123	1.89784e-132	1.10531e-130	up	2477
Cluster-19620.0	37.6533	64.4833	1.03805	3.41836e-132	1.98811e-130	up	2747
Cluster-23086.0	1.78667	31.45	3.81735	6.28584e-132	3.6457e-130	up	2242
Cluster-13741.0	48.81	13.52	-1.59943	1.30565e-131	7.5517e-130	down	1533
Cluster-21755.0	14.1233	30.8267	1.38659	1.49152e-131	8.61484e-130	up	2923
Cluster-19245.0	17.8667	37.39	1.30484	2.29398e-131	1.32315e-129	up	2875
Cluster-21591.0	47.97	10.0333	-2.01366	3.08404e-131	1.77153e-129	down	1641
Cluster-6482.1	42.81	79.7	1.14959	3.23392e-131	1.85507e-129	up	1452
Cluster-17488.0	4.46	14.9567	1.9992	7.2872e-131	4.17444e-129	up	3040
Cluster-18006.1	21.5967	46.8133	1.36854	1.1339e-130	6.4866e-129	up	2144
Cluster-17320.4	28.1433	96.69	2.04589	1.30096e-130	7.43213e-129	up	828
Cluster-16446.0	113.077	35.07	-1.43386	1.68297e-130	9.60139e-129	down	1018
Cluster-18904.2	158.8	318.457	1.25579	5.89214e-130	3.34327e-128	up	2042
Cluster-17028.3	0.653333	26.71	5.64822	7.3106e-130	4.14251e-128	up	1752
Cluster-17815.2	0.143333	7.89	6.07429	1.06252e-129	6.01258e-128	up	6176
Cluster-17080.0	1.13	40.9233	5.47789	1.44665e-129	8.16422e-128	up	1078
Cluster-31971.10	47.36	90.6233	1.15311	2.02447e-128	1.14098e-126	up	1893
Cluster-21700.0	48.2567	82.9333	1.01686	3.111e-128	1.74863e-126	up	2021
Cluster-19720.0	3.7	13.25	2.09144	3.1658e-128	1.77705e-126	up	3515
Cluster-18035.0	18.9667	57.3367	1.84989	6.45001e-128	3.61572e-126	up	1377
Cluster-30283.7	8.79333	23.6733	1.68139	8.63299e-128	4.83298e-126	up	2065
Cluster-29455.0	20.6	57.8533	1.74257	1.30312e-127	7.28545e-126	up	1814
Cluster-30440.11	11.1867	24.0867	1.35755	1.68758e-127	9.42233e-126	up	4438
Cluster-23428.0	45.5767	94.5433	1.30182	1.81057e-127	1.00955e-125	up	1467
Cluster-3566.0	22.8833	116.307	2.60139	1.85271e-127	1.03168e-125	up	937
Cluster-26286.0	13.03	2.4	-2.20786	3.80279e-127	2.11477e-125	down	3585
Cluster-10560.0	50.4333	133.507	1.66128	4.20673e-127	2.3363e-125	up	888
Cluster-20974.1	27.83	7.32667	-1.69023	5.19771e-127	2.88283e-125	down	2697
Cluster-23262.0	112.303	205.973	1.12766	6.74502e-127	3.73115e-125	up	1658
Cluster-36426.8	11.4467	30.4967	1.66733	7.33473e-127	4.05201e-125	up	1906
Cluster-24316.6	8.32333	22.48	1.63228	2.5039e-126	1.38144e-124	up	2895
Cluster-24945.1	6.20333	27.4467	2.40067	3.64941e-126	2.01078e-124	up	1336
Cluster-24173.0	43.8267	91.7533	1.32068	7.35934e-126	4.04957e-124	up	1157
Cluster-30004.0	3.68	12.4233	2.00426	9.69273e-126	5.31261e-124	up	3692
Cluster-36169.0	135.17	54.9967	-1.03526	1.26222e-125	6.90924e-124	down	1384
Cluster-24923.0	0.0766667	3.84333	5.87502	1.85274e-125	1.01284e-123	up	7677
Cluster-29666.0	53.6167	21.5667	-1.05928	2.41728e-125	1.31973e-123	down	2860
Cluster-20380.0	18.1433	40.41	1.38806	2.67274e-125	1.4573e-123	up	3361
Cluster-30249.1	15.79	2.36333	-2.49409	3.21736e-125	1.75198e-123	down	2647
Cluster-34018.15	23.8133	46.5233	1.22368	7.19203e-125	3.90618e-123	up	5417
Cluster-36385.7	12.77	86.9033	3.02174	8.09374e-125	4.39023e-123	up	1600
Cluster-16890.0	2.02667	33.55	4.30392	1.67918e-124	9.09646e-123	up	1795
Cluster-31177.0	39.29	83.24	1.31775	2.70663e-124	1.46434e-122	up	1526
Cluster-25862.0	7.93	21.3567	1.73735	6.90059e-124	3.72374e-122	up	3540
Cluster-19263.0	75.9133	221.337	1.81109	1.05303e-123	5.66056e-122	up	637
Cluster-36039.2	14.5567	34.0667	1.47881	1.31174e-123	7.04222e-122	up	2132
Cluster-32412.0	96.29	185.957	1.1762	1.73541e-123	9.2929e-122	up	4488
Cluster-26704.0	9.58	41.8067	2.38112	1.82948e-123	9.78408e-122	up	1043
Cluster-7872.7	88.4033	153.277	1.10457	2.21677e-123	1.18402e-121	up	1192
Cluster-30133.1	25.6433	50.4267	1.22773	2.82724e-123	1.50624e-121	up	1950
Cluster-18519.0	1.08	13.3767	3.87975	3.12519e-123	1.66075e-121	up	2362
Cluster-12576.0	167.363	60.3233	-1.21319	3.58431e-123	1.90232e-121	down	1000
Cluster-27667.0	0.363333	49.0667	7.4316	4.72599e-123	2.50508e-121	up	1304
Cluster-15492.0	30.0867	55.58	1.14431	5.72211e-123	3.02924e-121	up	3441
Cluster-20305.0	2.17	52.2467	4.84944	8.40139e-123	4.44202e-121	up	802
Cluster-13564.0	25.8567	57.02	1.39322	1.78604e-122	9.4313e-121	up	1959
Cluster-29747.1	1.15333	38.4667	5.38187	2.4854e-122	1.31078e-120	up	998
Cluster-30568.4	34.5767	1.26667	-4.53252	2.95546e-122	1.55673e-120	down	1153
Cluster-24259.0	24.09	40.9267	1.01531	2.9596e-122	1.55695e-120	up	2396
Cluster-3443.0	0.156667	47.7867	8.55157	3.48738e-122	1.8323e-120	up	2361
Cluster-12084.0	18.71	40.6633	1.37189	4.23946e-122	2.22187e-120	up	2133
Cluster-36016.9	6.82333	20.6933	1.85177	5.25688e-122	2.75165e-120	up	5053
Cluster-19122.0	68.4733	156.223	1.44157	6.20891e-122	3.24592e-120	up	2637
Cluster-9628.0	71.0333	16.0667	-1.89065	6.34069e-122	3.31068e-120	down	1605
Cluster-6465.0	193.13	62.9367	-1.36598	6.7067e-122	3.49742e-120	down	2664
Cluster-20989.14	7.35333	36.74	2.55865	7.45004e-122	3.88023e-120	up	1955
Cluster-18835.0	42.2333	79.0533	1.15566	2.03938e-121	1.05954e-119	up	3290
Cluster-26542.0	15.1367	31.9	1.27493	2.38945e-121	1.23988e-119	up	5045
Cluster-37191.2	20.6533	45.5567	1.43124	3.9431e-121	2.03597e-119	up	4542
Cluster-7872.6	354.697	662.953	1.16819	1.12867e-120	5.82058e-119	up	582
Cluster-20873.4	23.5333	53.3267	1.42855	1.36418e-120	7.02645e-119	up	1489
Cluster-32043.3	11.07	22.26	1.25855	2.24914e-120	1.15562e-118	up	2937
Cluster-26069.2	143.927	35.4967	-1.76365	2.98904e-120	1.5339e-118	down	1074
Cluster-19385.0	3.48333	29.8433	3.353	6.41457e-120	3.28374e-118	up	1015
Cluster-35537.6	53.9167	215.353	2.26683	2.45565e-119	1.25556e-117	up	509
Cluster-34646.0	53.4567	146.86	1.69986	2.64466e-119	1.35055e-117	up	858
Cluster-32221.1	91.6033	159.37	1.05084	2.84068e-119	1.44888e-117	up	2055
Cluster-29193.1	43.5767	88.28	1.27244	3.1035e-119	1.58101e-117	up	1534
Cluster-26735.0	158.087	60.9667	-1.12089	3.53843e-119	1.80038e-117	down	1172
Cluster-20683.9	17.3433	53.4133	1.89166	4.65657e-119	2.36356e-117	up	1022
Cluster-28527.3	31.9067	54.21	1.01673	5.96361e-119	3.02332e-117	up	1952
Cluster-31462.0	35.4767	8.36667	-1.844	7.27878e-119	3.6856e-117	down	2099
Cluster-28250.6	15.61	34.19	1.38206	1.03691e-118	5.24402e-117	up	1989
Cluster-34691.1	3.34333	33.5733	3.59126	2.41217e-118	1.21845e-116	up	1200
Cluster-13500.0	14.7	28.7	1.21589	1.44476e-117	7.28028e-116	up	3281
Cluster-20044.0	3.92667	10.2233	1.63003	1.83024e-117	9.21169e-116	up	4091
Cluster-25736.4	22.6533	56.3267	1.56941	2.28998e-117	1.15117e-115	up	1115
Cluster-18419.0	1.55	39.74	4.93904	3.51973e-117	1.76725e-115	up	971
Cluster-17217.10	9.16667	0.07	-6.81437	7.36269e-117	3.69237e-115	down	5905
Cluster-34059.0	60.4033	114.883	1.17695	1.03626e-116	5.1844e-115	up	3103
Cluster-33111.4	2.4	11.8233	2.55388	1.08141e-116	5.40384e-115	up	2977
Cluster-20332.0	22.8467	6.55	-1.5786	1.42311e-116	7.09435e-115	down	3269
Cluster-16649.1	17.9533	1.07	-3.8236	1.96994e-116	9.80871e-115	down	4059
Cluster-23758.0	35.3967	62.4833	1.07104	1.98695e-116	9.88166e-115	up	2800
Cluster-21957.3	48.6167	9.99	-2.03112	3.66412e-116	1.82011e-114	down	1669
Cluster-36470.2	37.4467	12.74	-1.30097	7.0778e-116	3.50749e-114	down	3530
Cluster-16261.0	55.9633	120.42	1.36348	7.44578e-116	3.68549e-114	up	832
Cluster-13782.0	29.95	8.69	-1.53338	9.87512e-116	4.88218e-114	down	2082
Cluster-21473.0	0.413333	582.053	11.0141	1.02445e-115	5.05884e-114	up	716
Cluster-15583.0	22.0167	1.31333	-3.81702	1.10594e-115	5.45477e-114	down	1553
Cluster-32643.0	32.4633	59.1667	1.11497	1.37424e-115	6.77014e-114	up	4840
Cluster-19555.0	130.607	258.673	1.24178	2.1718e-115	1.06742e-113	up	789
Cluster-18486.0	115.563	42.3033	-1.19515	2.72915e-115	1.33978e-113	down	1036
Cluster-25168.1	87.19	16.2533	-2.15798	3.58862e-115	1.75964e-113	down	1080
Cluster-35648.2	25.9267	2.89667	-2.92346	3.79445e-115	1.85839e-113	down	1500
Cluster-10488.0	88.68	5.16	-3.84094	4.60858e-115	2.25449e-113	down	653
Cluster-26188.5	9.04667	31.0267	2.03207	5.11418e-115	2.49891e-113	up	1995
Cluster-36536.7	4.78	18.91	2.21419	6.52838e-115	3.18249e-113	up	2868
Cluster-19429.0	19.51	42.6233	1.37604	7.42784e-115	3.61675e-113	up	3215
Cluster-27741.0	16.13	38.5233	1.61597	8.80931e-115	4.28444e-113	up	5824
Cluster-36915.1	68.3	127.693	1.15642	1.29639e-114	6.28316e-113	up	1248
Cluster-17793.0	1.48333	41.5233	5.06194	1.65081e-114	7.99163e-113	up	1036
Cluster-32371.7	14.01	29.6033	1.33111	1.87427e-114	9.06294e-113	up	3338
Cluster-20045.0	31.31	65.06	1.31301	4.53554e-114	2.19061e-112	up	1736
Cluster-31129.2	1.79667	7.94667	2.39859	4.96204e-114	2.39384e-112	up	7422
Cluster-17433.1	28.9567	52.7733	1.11659	5.16764e-114	2.49016e-112	up	2649
Cluster-30454.0	12.83	2.35	-2.19723	1.17913e-113	5.66889e-112	down	3111
Cluster-35603.1	53.83	100.6	1.15541	1.22915e-113	5.90259e-112	up	1510
Cluster-11864.1	15.19	27.5333	1.10966	1.73797e-113	8.33646e-112	up	3162
Cluster-36727.0	66.8167	7.56667	-2.88958	1.89248e-113	9.06721e-112	down	867
Cluster-16335.0	40.3	16.0433	-1.08067	2.05276e-113	9.82392e-112	down	2936
Cluster-23725.0	3.03667	12.8333	2.41396	5.20792e-113	2.48668e-111	up	3670
Cluster-9767.0	33.8367	57.9833	1.00844	5.65058e-113	2.69497e-111	up	3089
Cluster-18929.0	89.6433	27.7633	-1.43463	5.77926e-113	2.75007e-111	down	1024
Cluster-12790.0	111.717	195.183	1.03586	1.16648e-112	5.5444e-111	up	808
Cluster-28160.5	14.08	31.3633	1.40674	1.35243e-112	6.41369e-111	up	2938
Cluster-34562.4	32.45	60.4933	1.15095	3.14844e-112	1.49141e-110	up	1877
Cluster-19639.1	29.4167	53.9	1.1631	3.66186e-112	1.73266e-110	up	3251
Cluster-18550.0	45.19	114.82	1.62303	4.91333e-112	2.32219e-110	up	1090
Cluster-32690.8	22.8033	44.7933	1.22707	1.44853e-111	6.8231e-110	up	1928
Cluster-29090.0	25.8267	44.99	1.03578	3.09752e-111	1.45413e-109	up	3366
Cluster-36846.0	2.91333	18.4833	2.91843	3.53465e-111	1.65749e-109	up	2823
Cluster-38078.0	1.49333	10.75	2.81877	3.72518e-111	1.74487e-109	up	3086
Cluster-36672.10	49.88	11.67	-1.84381	4.2752e-111	2.00027e-109	down	1260
Cluster-30307.6	7.37333	22.5733	1.86678	5.60055e-111	2.61745e-109	up	3228
Cluster-36510.6	21.5367	54.07	1.58011	1.29653e-110	6.0459e-109	up	1438
Cluster-18113.0	8.62667	31.0667	2.10158	1.65034e-110	7.67865e-109	up	1407
Cluster-16634.7	22.3667	46.7767	1.31762	4.58666e-110	2.12934e-108	up	1917
Cluster-22188.7	2.72	8.96667	1.99227	4.59384e-110	2.13031e-108	up	5428
Cluster-32611.4	5.95667	23.5567	2.23939	5.30669e-110	2.45816e-108	up	1741
Cluster-30500.0	2.56	10.0067	2.13917	7.19275e-110	3.32814e-108	up	4768
Cluster-22077.8	0.26	62.02	8.19649	1.00222e-109	4.63224e-108	up	1264
Cluster-30751.0	1.49333	15.4633	3.6114	1.23824e-109	5.71678e-108	up	2764
Cluster-20760.0	5.56667	40.2	3.10939	1.35356e-109	6.23544e-108	up	899
Cluster-26795.0	16.2967	5.05333	-1.45297	6.61931e-109	3.0393e-107	down	4499
Cluster-25128.0	40.3733	74.27	1.13521	1.00782e-108	4.62239e-107	up	2349
Cluster-29258.7	1.72667	21.7267	3.92405	1.04726e-108	4.79803e-107	up	1498
Cluster-19409.11	11.94	31.3333	1.83457	1.06332e-108	4.86629e-107	up	8449
Cluster-15354.0	20.0033	34.61	1.03985	1.17101e-108	5.35326e-107	up	3151
Cluster-36463.2	15.38	25.9467	1.00846	2.46179e-108	1.12418e-106	up	3126
Cluster-5184.0	0.566667	14.8567	4.97407	3.10942e-108	1.41745e-106	up	1756
Cluster-4447.0	54.2633	12.6033	-1.85156	3.11078e-108	1.41745e-106	down	1173
Cluster-18491.0	11.1033	27.78	1.57669	5.75389e-108	2.61896e-106	up	1989
Cluster-23082.4	16.2267	36.8067	1.43569	8.22363e-108	3.73903e-106	up	1549
Cluster-9750.0	122.777	30.1633	-1.76296	1.42249e-107	6.46063e-106	down	664
Cluster-24349.1	54.9233	19.0467	-1.27841	1.769e-107	8.00829e-106	down	2013
Cluster-17994.1	24.3367	67.8	1.73644	2.50021e-107	1.12819e-105	up	803
Cluster-19494.1	90.2967	154.363	1.1045	5.24763e-107	2.36285e-105	up	2243
Cluster-35049.2	11.34	47.2233	2.31398	7.48919e-107	3.36853e-105	up	1172
Cluster-21502.1	9.6	22.8367	1.52203	7.61082e-107	3.41956e-105	up	3903
Cluster-26675.12	16.0467	2.37667	-2.50499	1.32567e-106	5.94986e-105	down	4286
Cluster-15210.2	17.02	40.0067	1.48716	1.57637e-106	7.06752e-105	up	1599
Cluster-35046.1	35.6233	90.2	1.58043	2.36793e-106	1.0605e-104	up	1746
Cluster-36528.8	34.2733	6.08667	-2.2461	2.55364e-106	1.14245e-104	down	1531
Cluster-34139.1	11.91	55.0467	2.46882	3.5543e-106	1.58844e-104	up	1030
Cluster-28541.2	113.907	37.4133	-1.35524	3.66982e-106	1.63831e-104	down	1759
Cluster-30788.0	17.8733	56.7567	1.92216	4.8387e-106	2.15783e-104	up	1310
Cluster-13257.0	74.0867	27.0067	-1.20227	6.23604e-106	2.77803e-104	down	1498
Cluster-21562.0	19.2967	7.41667	-1.13614	1.55836e-105	6.92741e-104	down	8501
Cluster-35814.0	74.7433	126.11	1.0083	1.61783e-105	7.18414e-104	up	1329
Cluster-28648.3	27.2033	104.333	2.28261	3.57092e-105	1.58235e-103	up	668
Cluster-32525.0	39.14	9.07667	-1.85653	4.18903e-105	1.85429e-103	down	2010
Cluster-17033.0	10.47	19.1367	1.1228	4.25153e-105	1.87997e-103	up	6096
Cluster-32488.9	7.17	17.7333	1.55883	9.09691e-105	4.01828e-103	up	2783
Cluster-36803.5	5.22333	20.85	2.24995	9.39633e-105	4.14617e-103	up	1737
Cluster-31268.0	0.553333	6.49667	3.7963	1.13707e-104	5.00683e-103	up	4055
Cluster-34502.0	15.1567	28.7633	1.16164	1.30084e-104	5.72193e-103	up	3411
Cluster-13782.1	52.17	17.5433	-1.3202	4.05557e-104	1.77643e-102	down	1909
Cluster-36923.0	3.93	62.81	4.26405	4.74432e-104	2.07595e-102	up	817
Cluster-33655.7	18.02	30.7	1.0193	1.01837e-103	4.45137e-102	up	3126
Cluster-13256.0	28.8633	49.06	1.0162	1.32053e-103	5.76614e-102	up	1890
Cluster-27892.0	28.9433	8.29667	-1.55148	1.99406e-103	8.69807e-102	down	2518
Cluster-26849.2	113.553	44.3367	-1.12898	2.10574e-103	9.17564e-102	down	2244
Cluster-30753.0	1.27333	15.5667	3.86401	2.54744e-103	1.10888e-101	up	2692
Cluster-32796.14	187.11	74.59	-1.07499	4.08105e-103	1.7746e-101	down	1608
Cluster-36385.2	85.43	27.68	-1.37225	4.96075e-103	2.15489e-101	down	1086
Cluster-30020.2	21.7333	45.7467	1.3257	5.40345e-103	2.34476e-101	up	2763
Cluster-10498.0	0.183333	15.73	7.02377	7.95529e-103	3.44853e-101	up	3035
Cluster-28339.0	47.1167	91.2233	1.08716	9.69997e-103	4.20048e-101	up	2275
Cluster-28899.4	33.09	1.53333	-2.47597	1.11806e-102	4.83164e-101	down	4298
Cluster-28063.0	18.3467	40.0833	1.37955	1.14542e-102	4.94478e-101	up	2671
Cluster-35192.7	36.87	76.39	1.28409	1.52702e-102	6.58537e-101	up	1125
Cluster-19627.0	80.13	29.6133	-1.18213	1.70118e-102	7.32138e-101	down	1248
Cluster-23126.4	37.3533	65.9	1.06985	2.77986e-102	1.19269e-100	up	2950
Cluster-18958.0	29.95	8.66333	-1.52446	2.83588e-102	1.21548e-100	down	1981
Cluster-36814.1	10.5667	25.7633	1.4474	4.71802e-102	2.02011e-100	up	3378
Cluster-30004.6	4.89667	14.07	1.77556	8.47044e-102	3.62308e-100	up	4141
Cluster-33392.1	23.2867	5.65	-1.78625	1.61119e-101	6.88456e-100	down	1986
Cluster-35764.0	63.5967	13.6967	-1.96771	2.20946e-101	9.43133e-100	down	1067
Cluster-18797.0	97.4367	224.227	1.46722	2.23643e-101	9.53671e-100	up	590
Cluster-9247.0	15.8033	29.6333	1.15995	3.03688e-101	1.29369e-99	up	2684
Cluster-7429.0	15.0067	30.93	1.2953	1.11697e-100	4.7389e-99	up	2457
Cluster-28977.0	83.0733	28.0867	-1.28766	1.31308e-100	5.56533e-99	down	3046
Cluster-19020.0	12.0333	2.37	-2.09385	1.47989e-100	6.26596e-99	down	3257
Cluster-32825.0	72.9467	102.193	1.00254	1.65419e-100	6.99687e-99	up	3182
Cluster-21146.0	4.95333	19.3733	2.22042	2.66378e-100	1.12559e-98	up	1972
Cluster-12869.2	1.56333	54.2133	5.40572	3.80366e-100	1.60563e-98	up	783
Cluster-17502.1	53.7667	120.91	1.42234	7.18101e-100	3.0252e-98	up	1541
Cluster-29085.1	123.4	48.62	-1.02198	1.07998e-99	4.54515e-98	down	2304
Cluster-36911.0	24.93	84.5867	1.93831	1.74196e-99	7.3164e-98	up	772
Cluster-29322.2	16.9267	30.2333	1.14338	1.82182e-99	7.64415e-98	up	4558
Cluster-19095.0	12.9367	24.0267	1.14844	2.62494e-99	1.10029e-97	up	3685
Cluster-35401.4	0.61	6.26333	3.61531	2.87307e-99	1.2031e-97	up	4381
Cluster-23556.4	37.1567	88.3467	1.50786	3.3552e-99	1.40359e-97	up	780
Cluster-31838.6	12.5667	29.4767	1.48204	3.49982e-99	1.46262e-97	up	2056
Cluster-15733.0	34.7967	11.5233	-1.34332	4.60293e-99	1.92171e-97	down	2083
Cluster-33057.0	94.1367	20.4133	-1.9443	4.96808e-99	2.0721e-97	down	725
Cluster-25455.5	13.0367	28.15	1.36323	5.22166e-99	2.17569e-97	up	1790
Cluster-19409.2	5.08667	13.3167	1.64175	6.19108e-99	2.57705e-97	up	3368
Cluster-6394.0	0.953333	24.3867	4.94713	1.06725e-98	4.42924e-97	up	1064
Cluster-31203.6	23.03	7.61333	-1.34885	3.55577e-98	1.47424e-96	down	4651
Cluster-8811.0	10.0833	22.7667	1.42825	4.47722e-98	1.8526e-96	up	3805
Cluster-5674.0	8.36333	32.6167	2.21748	5.78614e-98	2.39185e-96	up	1263
Cluster-19624.0	18.3733	48.14	1.64284	7.33947e-98	3.02798e-96	up	1319
Cluster-20694.0	49.7467	88.3767	1.07687	1.27378e-97	5.2345e-96	up	2184
Cluster-33944.0	10.8933	30.6767	1.74816	1.28792e-97	5.2874e-96	up	1558
Cluster-9152.2	0.543333	24.1333	5.72014	2.80331e-97	1.14974e-95	up	1428
Cluster-25445.0	32.0767	55.3333	1.03632	3.68713e-97	1.51075e-95	up	2340
Cluster-23906.0	73.2867	134.71	1.1354	5.15689e-97	2.1109e-95	up	1818
Cluster-33482.2	1.03333	47.25	4.53674	6.46916e-97	2.64547e-95	up	1255
Cluster-12935.0	14.1833	37.7767	1.65923	6.71158e-97	2.74193e-95	up	1606
Cluster-19036.5	45.6533	122.977	1.68005	7.56887e-97	3.08915e-95	up	3689
Cluster-28869.15	12.5	31.2767	1.5757	9.12031e-97	3.71872e-95	up	1410
Cluster-5508.0	28.1933	60.8967	1.36356	1.1708e-96	4.7692e-95	up	1788
Cluster-32219.8	7.72333	40.08	2.63604	1.20965e-96	4.92264e-95	up	953
Cluster-4703.2	4.16667	14.14	2.02847	2.31675e-96	9.39146e-95	up	2530
Cluster-33747.0	63.2667	112.21	1.07479	3.59512e-96	1.45455e-94	up	1405
Cluster-24062.1	43.73	4.26333	-3.1162	3.90524e-96	1.5785e-94	down	903
Cluster-8301.0	127.29	41.5533	-1.35579	5.11918e-96	2.06717e-94	down	734
Cluster-37483.3	10.3967	0.203333	-5.49997	5.15553e-96	2.07985e-94	down	3305
Cluster-32459.3	143.537	278.82	1.21598	5.47826e-96	2.20791e-94	up	715
Cluster-20632.5	45.0467	15.0933	-1.32403	6.7185e-96	2.70517e-94	down	1791
Cluster-21614.0	21.1633	47.62	1.46289	7.62274e-96	3.06631e-94	up	1569
Cluster-28925.4	7.57667	15.5467	1.27638	1.94149e-95	7.77989e-94	up	3431
Cluster-22631.1	45.57	18.75	-1.06571	2.01882e-95	8.08202e-94	down	2293
Cluster-20181.0	3.44667	10.6133	1.8658	2.12085e-95	8.48237e-94	up	3009
Cluster-31831.0	14.5067	0.306667	-5.55319	2.57576e-95	1.0292e-93	down	2205
Cluster-31662.1	4.81667	11.0733	1.45267	3.08488e-95	1.23145e-93	up	4038
Cluster-23708.0	51.0067	201.39	2.26728	3.71435e-95	1.48132e-93	up	703
Cluster-16167.0	11.0133	1.71333	-2.43471	4.97043e-95	1.98037e-93	down	3326
Cluster-33758.0	42.2167	89.73	1.34601	6.18557e-95	2.45984e-93	up	812
Cluster-27249.0	16.9	54.0433	1.96584	7.63979e-95	3.03526e-93	up	1346
Cluster-22917.0	13.0467	36.54	1.66663	8.03331e-95	3.18858e-93	up	3051
Cluster-18664.1	117.267	264.573	1.43728	1.8999e-94	7.53395e-93	up	728
Cluster-33109.1	53.0867	109.017	1.27705	2.47644e-94	9.81089e-93	up	1562
Cluster-9271.0	20.8	3.42667	-2.38873	2.76941e-94	1.09611e-92	down	2410
Cluster-26972.1	15.2567	29.15	1.48195	5.2536e-94	2.07542e-92	up	2567
Cluster-37612.4	22.09	49.56	1.4159	5.34571e-94	2.10959e-92	up	5067
Cluster-21493.0	20.7967	39.4167	1.18066	5.35017e-94	2.10959e-92	up	4212
Cluster-22545.0	180.84	356.533	1.24166	5.86179e-94	2.30915e-92	up	680
Cluster-19879.0	19.28	39.4133	1.28783	6.97882e-94	2.7466e-92	up	1796
Cluster-19482.0	78.1367	32.6933	-1.04887	8.65189e-94	3.39867e-92	down	2080
Cluster-31486.0	43.6267	110.933	1.59802	1.99407e-93	7.81851e-92	up	2098
Cluster-16695.0	4.94	11.16	1.42636	4.1202e-93	1.61397e-91	up	3674
Cluster-31632.0	4.19333	24.8333	2.66589	6.32455e-93	2.47283e-91	up	2310
Cluster-22413.1	2.74333	91.1433	5.31273	8.12865e-93	3.17526e-91	up	628
Cluster-36682.8	20.0133	4.82667	-1.80314	8.41883e-93	3.28554e-91	down	2185
Cluster-31585.0	2.61	11.04	2.33509	1.12118e-92	4.35927e-91	up	3390
Cluster-14550.0	3.16667	22.7767	3.10754	1.52576e-92	5.92132e-91	up	1252
Cluster-29836.2	34.73	61.9967	1.08634	2.10137e-92	8.14766e-91	up	4295
Cluster-911.53	29.4233	8.80333	-1.4906	4.63225e-92	1.79275e-90	down	3234
Cluster-33351.0	0.5	5.54667	3.73974	4.73351e-92	1.83025e-90	up	4592
Cluster-18071.0	1.55667	15.85	3.75993	5.94611e-92	2.29699e-90	up	1487
Cluster-35244.0	22.1667	45.9367	1.30308	1.43138e-91	5.51417e-90	up	2514
Cluster-8942.0	36.33	68.6833	1.17337	2.57496e-91	9.91053e-90	up	1120
Cluster-8046.0	161.307	61.1167	-1.14579	2.85229e-91	1.09678e-89	down	1106
Cluster-20911.0	49.6033	93.9567	1.18166	4.38939e-91	1.6832e-89	up	961
Cluster-34280.0	1.14667	6.42333	2.7542	5.7113e-91	2.18811e-89	up	4612
Cluster-36164.1	39.5333	73.3567	1.18318	1.13076e-90	4.32426e-89	up	1158
Cluster-18144.0	198.243	523.097	1.67237	1.14953e-90	4.39202e-89	up	486
Cluster-9305.0	5.36	105.03	4.56082	1.15522e-90	4.40974e-89	up	493
Cluster-32640.5	4.95667	10.06	1.27184	1.18338e-90	4.51311e-89	up	6561
Cluster-12368.2	90.56	24.1567	-1.65533	2.10355e-90	7.99331e-89	down	2228
Cluster-29365.0	23.5	0.31	-6.07219	2.15923e-90	8.19745e-89	down	1784
Cluster-26067.0	0.613333	28.7433	5.79142	2.2312e-90	8.46302e-89	up	1679
Cluster-35537.2	24.87	68.26	1.71602	4.1548e-90	1.5745e-88	up	789
Cluster-23859.0	1.33	7.81667	2.82231	5.29774e-90	2.00219e-88	up	3060
Cluster-30606.7	21.26	44.5333	1.31938	8.03026e-90	3.02943e-88	up	2142
Cluster-33933.0	21.6133	6.16	-1.55852	8.27082e-90	3.11738e-88	down	2453
Cluster-30348.0	65.2333	22.1467	-1.30112	9.35506e-90	3.52287e-88	down	3938
Cluster-28439.0	12.91	31.0667	1.51948	1.48096e-89	5.5719e-88	up	1386
Cluster-31463.5	16.3167	40.0333	1.54659	2.24885e-89	8.44578e-88	up	2796
Cluster-16607.0	19.03	35.2733	1.14223	2.27506e-89	8.53657e-88	up	1927
Cluster-23208.1	7.26333	307.57	6.40276	3.8113e-89	1.42753e-87	up	826
Cluster-20682.0	12.42	24.03	1.20319	4.44988e-89	1.66523e-87	up	2288
Cluster-21066.0	56.9467	109.787	1.20268	4.57708e-89	1.71129e-87	up	1052
Cluster-15721.0	79.8967	22.6333	-1.55883	4.67557e-89	1.74656e-87	down	847
Cluster-18756.0	70.2767	142.343	1.27412	6.71994e-89	2.50577e-87	up	753
Cluster-26338.0	1.09333	44.2633	5.60819	8.97271e-89	3.33984e-87	up	907
Cluster-24832.2	3.49667	16.9367	2.52221	2.6338e-88	9.76887e-87	up	2031
Cluster-2939.0	104.287	181.373	1.05282	3.26423e-88	1.20964e-86	up	1134
Cluster-21005.0	28.49	65.4567	1.45444	4.00542e-88	1.483e-86	up	1534
Cluster-18083.0	43.8933	1.57333	-4.58544	4.26856e-88	1.57903e-86	down	908
Cluster-35715.4	30.5733	3.30333	-2.97468	7.12369e-88	2.63287e-86	down	1031
Cluster-20459.0	43.5133	138.113	1.92255	7.79898e-88	2.87991e-86	up	661
Cluster-31499.0	3.82667	142.757	5.49485	1.42372e-87	5.24809e-86	up	450
Cluster-16565.0	18.6933	4.28667	-1.87275	2.51334e-87	9.25646e-86	down	2169
Cluster-33400.2	0.146667	192.96	10.8532	2.5531e-87	9.39466e-86	up	1138
Cluster-23431.1	5.52667	43.5433	3.2495	3.08563e-87	1.13343e-85	up	738
Cluster-19259.0	91.9467	181.347	1.24286	5.24379e-87	1.92449e-85	up	1204
Cluster-36097.0	0.526667	4.07333	3.21024	5.67932e-87	2.07886e-85	up	5061
Cluster-5117.0	22.16	71.8833	1.95653	1.30873e-86	4.7863e-85	up	770
Cluster-32432.0	13.5633	38.0333	1.73982	1.3211e-86	4.82733e-85	up	1967
Cluster-6611.0	1.5	33.5733	4.74272	1.48708e-86	5.42907e-85	up	983
Cluster-33059.0	31.2	5.79667	-2.18163	1.61479e-86	5.89019e-85	down	1670
Cluster-30911.0	43.17	12.8333	-1.50193	1.96034e-86	7.1382e-85	down	2799
Cluster-29882.4	8.27667	21	1.59655	3.41609e-86	1.24282e-84	up	2262
Cluster-20427.0	8.27	29.0633	2.06784	4.01724e-86	1.45899e-84	up	1254
Cluster-18898.1	2.20667	22.04	3.60939	5.07613e-86	1.84197e-84	up	1496
Cluster-15383.0	84.9033	185.02	1.38612	5.40882e-86	1.96099e-84	up	712
Cluster-27785.1	14.61	27.2833	1.15009	6.35825e-86	2.30321e-84	up	6079
Cluster-18835.2	15.8833	36.3433	1.44492	8.43124e-86	3.0515e-84	up	3566
Cluster-12546.0	39.64	80.9433	1.28665	8.52529e-86	3.08287e-84	up	1001
Cluster-13729.5	87.17	174.243	1.25615	1.25711e-85	4.52636e-84	up	860
Cluster-25995.1	0.406667	7.02	4.39288	1.64625e-85	5.92241e-84	up	3178
Cluster-18944.0	75.4967	131.277	1.05173	3.93738e-85	1.41404e-83	up	1458
Cluster-18405.0	83.8767	31.46	-1.16374	4.05932e-85	1.45659e-83	down	1566
Cluster-20203.0	20.05	2.92	-2.43959	4.61184e-85	1.65343e-83	down	3009
Cluster-23126.6	11.04	25.4967	1.45902	5.37793e-85	1.92644e-83	up	2329
Cluster-20213.3	63.8733	16.2833	-1.71516	9.01292e-85	3.22578e-83	down	913
Cluster-22796.0	13.6267	4.9	-1.22473	1.06375e-84	3.80397e-83	down	6587
Cluster-31428.1	23.61	47.0833	1.24884	1.1683e-84	4.17429e-83	up	1572
Cluster-29707.5	28.7467	2.86333	-3.08122	2.54801e-84	9.06526e-83	down	1785
Cluster-13019.0	3.88333	137.003	5.41824	3.31445e-84	1.17721e-82	up	461
Cluster-25586.0	8.66	15.86	1.12431	3.63071e-84	1.28735e-82	up	4007
Cluster-34575.1	32.1033	9.25667	-1.54345	4.59574e-84	1.62814e-82	down	1810
Cluster-30999.0	51.63	20.19	-1.04425	6.41676e-84	2.27136e-82	down	3075
Cluster-27820.0	1.22	29.9	4.88469	1.52673e-83	5.39509e-82	up	972
Cluster-35592.0	3.17667	14.4567	2.44472	1.65665e-83	5.84924e-82	up	1586
Cluster-16685.0	11.3233	21.92	1.2336	1.84691e-83	6.51553e-82	up	2953
Cluster-15924.0	0.573333	10.65	4.48386	2.13204e-83	7.51509e-82	up	2161
Cluster-28752.2	4.96	20.44	2.29894	2.57634e-83	9.07353e-82	up	1652
Cluster-31203.5	15.4567	4.27667	-1.60437	2.74134e-83	9.64653e-82	down	4785
Cluster-27830.0	56.2267	106.397	1.17721	3.83926e-83	1.34873e-81	up	930
Cluster-37197.0	34.7033	13.05	-1.16987	5.59441e-83	1.96038e-81	down	2949
Cluster-37488.14	0.653333	7.48	3.78217	7.13301e-83	2.49745e-81	up	2326
Cluster-33596.0	7.96	34.9733	2.39783	7.35905e-83	2.57444e-81	up	1185
Cluster-19304.0	18.7633	4.9	-1.68583	1.05601e-82	3.68812e-81	down	2116
Cluster-12319.0	32.9733	7.59333	-1.85104	1.12853e-82	3.93811e-81	down	1829
Cluster-19447.8	1.42333	44.29	5.21603	1.20971e-82	4.21786e-81	up	805
Cluster-27830.16	50.5567	102.853	1.49335	1.85784e-82	6.46691e-81	up	3957
Cluster-15475.0	45.6267	89.61	1.22764	2.34061e-82	8.12712e-81	up	1598
Cluster-35537.5	18.54	65.07	2.06573	2.98182e-82	1.03278e-80	up	1452
Cluster-26051.1	21.87	37.9767	1.04672	2.9927e-82	1.0357e-80	up	2721
Cluster-25164.0	5.46667	5159.26	10.1636	3.11611e-82	1.07752e-80	up	611
Cluster-3823.0	29.4933	96.9733	1.9731	7.56635e-82	2.60989e-80	up	917
Cluster-29365.2	48.4967	83.7167	1.05142	9.79461e-82	3.37571e-80	up	1895
Cluster-9463.0	82.4867	26.7433	-1.36809	1.08488e-81	3.73597e-80	down	887
Cluster-22481.3	8.57	26.56	1.88679	1.28511e-81	4.42187e-80	up	1661
Cluster-21381.1	19.3467	54.0133	1.75269	1.49323e-81	5.13376e-80	up	1005
Cluster-20989.2	3.84333	19.0933	2.57237	1.66398e-81	5.71609e-80	up	1487
Cluster-34330.3	31.6033	58.8	1.14826	2.11089e-81	7.23943e-80	up	2343
Cluster-36122.1	51.0033	17.4233	-1.32351	6.19704e-81	2.11665e-79	down	1818
Cluster-6637.5	13.1733	4.29	-1.37131	6.48996e-81	2.21489e-79	down	5657
Cluster-23872.0	12.27	28.8367	1.49955	8.28373e-81	2.82247e-79	up	1458
Cluster-7552.0	8.72	45.0967	2.63105	8.53573e-81	2.90596e-79	up	698
Cluster-9820.0	34.19	101.73	1.83557	8.94628e-81	3.04326e-79	up	647
Cluster-32537.1	17.91	4.78333	-1.6541	1.42487e-80	4.83913e-79	down	2356
Cluster-37213.1	14.4733	0.813333	-3.58912	2.04533e-80	6.92945e-79	down	3428
Cluster-25917.5	0.503333	5.08	3.59899	2.22943e-80	7.54708e-79	up	4011
Cluster-36661.0	21.87	38.81	1.08274	2.37545e-80	8.0349e-79	up	3036
Cluster-30276.0	10.6067	20.46	1.20047	2.37789e-80	8.03664e-79	up	2789
Cluster-27895.13	11.0533	25.1433	1.42846	2.4526e-80	8.28247e-79	up	2038
Cluster-21985.5	23.0367	4.35	-2.17934	2.51548e-80	8.48113e-79	down	2413
Cluster-23556.9	11.5767	45.1433	2.21602	3.08526e-80	1.03938e-78	up	1235
Cluster-30382.7	9.02667	2.49	-1.6087	3.08869e-80	1.0397e-78	down	5425
Cluster-34862.3	4.9	17.89	2.12356	3.358e-80	1.12945e-78	up	1971
Cluster-31484.0	12.3767	38.23	1.85936	4.74405e-80	1.59308e-78	up	1141
Cluster-30193.0	24.19	41.02	1.00343	5.90188e-80	1.9803e-78	up	1963
Cluster-34987.0	53.11	89.8633	1.02103	1.00356e-79	3.36194e-78	up	3188
Cluster-25455.0	21.95	39.8267	1.11041	1.27957e-79	4.27972e-78	up	2981
Cluster-33479.11	0.273333	10.53	5.47588	1.60713e-79	5.37099e-78	up	2714
Cluster-31166.0	46.7367	0.24	-7.41378	2.55451e-79	8.5235e-78	down	1226
Cluster-38121.0	30.5133	2.84	-3.17302	3.06682e-79	1.02166e-77	down	2307
Cluster-2136.1	83.6967	35.0767	-1.01654	3.17977e-79	1.05845e-77	down	4472
Cluster-14163.0	36.84	12.7333	-1.28087	3.54029e-79	1.17752e-77	down	1747
Cluster-20258.2	9.06	24.47	1.49642	3.68506e-79	1.2247e-77	up	3771
Cluster-27546.0	14	23.5833	1.00329	4.02288e-79	1.33591e-77	up	2913
Cluster-18081.0	76.27	164.79	1.37301	5.81362e-79	1.92361e-77	up	715
Cluster-18916.0	9.8	49.41	2.5943	8.96053e-79	2.9545e-77	up	687
Cluster-6422.0	3.35	52.09	4.21949	9.07868e-79	2.99111e-77	up	773
Cluster-17666.4	6.60667	12.3333	1.15056	9.37698e-79	3.08696e-77	up	8437
Cluster-32305.0	0.976667	192.113	7.88466	1.14628e-78	3.76768e-77	up	1610
Cluster-32382.0	0.77	18.4467	4.83173	1.63341e-78	5.36044e-77	up	1093
Cluster-18308.0	54.55	101.17	1.14825	2.30101e-78	7.5454e-77	up	904
Cluster-25942.0	63.67	24.0533	-1.14229	3.15593e-78	1.03407e-76	down	1534
Cluster-28289.0	67.83	14.63	-1.95672	4.86075e-78	1.59019e-76	down	1334
Cluster-27033.1	5.20333	21.0167	2.2662	5.04372e-78	1.64876e-76	up	1861
Cluster-35298.4	5.90333	38.8733	2.97414	5.9192e-78	1.93193e-76	up	1712
Cluster-16285.0	2.11	12.67	2.84958	7.92807e-78	2.58356e-76	up	1571
Cluster-21861.0	1.73667	7.37333	2.34014	9.02044e-78	2.93497e-76	up	3194
Cluster-15152.0	12.1833	2.93667	-1.80202	1.01056e-77	3.2855e-76	down	2937
Cluster-25377.0	4.25667	20.1167	2.48927	1.62355e-77	5.27435e-76	up	1900
Cluster-12174.1	134.233	286.437	1.32308	1.63562e-77	5.30942e-76	up	827
Cluster-26683.0	60.5033	21.3467	-1.25031	1.75285e-77	5.67675e-76	down	1074
Cluster-31146.4	3.76333	10.0267	1.66419	2.58851e-77	8.36373e-76	up	4631
Cluster-24836.0	11.3867	24.5467	1.35972	3.00811e-77	9.712e-76	up	2371
Cluster-17825.0	6.73333	104.67	4.22784	3.23716e-77	1.04435e-75	up	494
Cluster-9197.0	14.8767	39.2467	1.65197	3.30044e-77	1.06394e-75	up	1462
Cluster-36768.0	2	16.3	3.10466	3.3666e-77	1.08443e-75	up	1738
Cluster-23102.0	34.9533	10.7	-1.45452	4.07071e-77	1.31023e-75	down	1714
Cluster-25455.2	8.92667	35.5667	2.24552	4.936e-77	1.58508e-75	up	2051
Cluster-16740.0	45.0167	2.24333	-4.00874	5.16446e-77	1.65718e-75	down	965
Cluster-16237.0	47.5833	84.1067	1.07487	5.70966e-77	1.82932e-75	up	1546
Cluster-7999.0	21.43	50.7167	1.49767	6.90053e-77	2.20917e-75	up	1127
Cluster-15071.0	23.75	3.64333	-2.25382	8.30909e-77	2.65605e-75	down	2087
Cluster-36001.2	9.32667	23.68	1.595	1.26878e-76	4.05263e-75	up	2959
Cluster-33693.0	0.89	7.97	3.41229	1.685e-76	5.37392e-75	up	2405
Cluster-33400.6	26.7167	1.43667	-3.98209	3.97619e-76	1.26426e-74	down	1162
Cluster-12165.0	17.9233	5.27	-1.51005	4.34392e-76	1.38013e-74	down	2567
Cluster-23536.0	12.08	26.19	1.35104	4.37226e-76	1.38809e-74	up	3242
Cluster-25687.1	1.44	48.2967	5.63369	4.42116e-76	1.40255e-74	up	1794
Cluster-12780.0	9.91333	23.1667	1.47479	4.69009e-76	1.48673e-74	up	2261
Cluster-31486.4	39.1267	98.1167	1.57829	4.72404e-76	1.49636e-74	up	2086
Cluster-36746.5	16.1933	5.36333	-1.3456	8.53336e-76	2.6989e-74	down	3304
Cluster-29802.0	14.4567	25.5433	1.07142	1.84592e-75	5.81187e-74	up	2684
Cluster-27280.0	2.41	34.5767	4.21136	1.8868e-75	5.93167e-74	up	804
Cluster-6740.0	34.7767	0.713333	-5.35691	2.169e-75	6.81371e-74	down	1098
Cluster-26332.0	14.4233	2.98333	-2.02226	2.49316e-75	7.80859e-74	down	2233
Cluster-32654.3	28.6033	9.61667	-1.32436	2.63283e-75	8.2399e-74	down	2134
Cluster-11176.0	41.4233	0.253333	-7.00779	2.89965e-75	9.06818e-74	down	1204
Cluster-28702.0	4.12	0.336667	-3.35538	4.34023e-75	1.3543e-73	down	4926
Cluster-33929.3	21.96	43.1433	1.226	5.22755e-75	1.62996e-73	up	2777
Cluster-24605.0	33.5067	11.5233	-1.29852	6.91036e-75	2.15146e-73	down	2903
Cluster-32136.4	0.663333	9.1	4.036	1.26243e-74	3.92458e-73	up	4911
Cluster-29570.0	1.69	32.28	4.55468	1.3713e-74	4.25673e-73	up	735
Cluster-37365.1	9.7	0.243333	-5.12358	1.84339e-74	5.7137e-73	down	2408
Cluster-32622.5	49.0667	92.2733	1.16413	2.57528e-74	7.97042e-73	up	1743
Cluster-20734.0	0.0166667	15.24	9.99854	2.81086e-74	8.69311e-73	up	5989
Cluster-23890.0	35.0033	80.1533	1.4476	3.92564e-74	1.21229e-72	up	1209
Cluster-18943.0	1.69	13.2367	3.21922	4.10882e-74	1.26792e-72	up	1692
Cluster-35020.0	4.86667	11.4167	1.48182	4.1226e-74	1.27124e-72	up	3174
Cluster-28808.1	15.1633	67.8233	2.42855	5.56076e-74	1.71344e-72	up	660
Cluster-10907.0	3.91	104.187	5.00532	6.67991e-74	2.05526e-72	up	475
Cluster-22279.6	39.6733	9	-1.88778	6.75041e-74	2.07543e-72	down	1712
Cluster-24389.5	48.28	110.07	1.44081	6.85483e-74	2.10599e-72	up	1491
Cluster-25408.0	13.5967	24.0733	1.08971	8.01733e-74	2.45953e-72	up	2484
Cluster-18889.1	1.05333	35.3733	5.32583	1.08609e-73	3.32456e-72	up	1106
Cluster-21710.0	50.5067	16.06	-1.39961	1.08946e-73	3.33243e-72	down	1192
Cluster-19834.0	2.55333	47.4233	4.47947	1.10492e-73	3.37377e-72	up	642
Cluster-17921.0	7.35667	12.9967	1.07117	1.10539e-73	3.37377e-72	up	3825
Cluster-21519.0	0.14	10.0967	6.40259	1.48514e-73	4.51963e-72	up	2604
Cluster-16024.0	6.51667	19.4133	1.77335	1.82992e-73	5.56484e-72	up	2271
Cluster-12630.0	91.2	171.98	1.16688	2.0843e-73	6.32921e-72	up	2487
Cluster-23285.0	160.443	40.47	-1.7365	2.31228e-73	7.01644e-72	down	947
Cluster-22626.0	37.5067	77.1133	1.29227	2.43822e-73	7.39323e-72	up	1742
Cluster-2548.1	151.737	42.6067	-1.56774	2.52809e-73	7.65465e-72	down	738
Cluster-13729.2	63.79	129.467	1.27752	5.21962e-73	1.57586e-71	up	929
Cluster-22792.0	22.9167	5.61667	-1.7795	5.57521e-73	1.682e-71	down	2205
Cluster-16882.0	21.41	54.97	1.6053	6.0614e-73	1.82605e-71	up	1036
Cluster-36749.3	11.2633	29.1933	1.6243	6.09732e-73	1.83555e-71	up	2489
Cluster-14848.0	20.5067	48.17	1.48701	6.63764e-73	1.99677e-71	up	1134
Cluster-16691.0	63.02	23.6933	-1.15826	9.32846e-73	2.80021e-71	down	1579
Cluster-34689.0	16.8067	4.25	-1.72546	1.31297e-72	3.9328e-71	down	2531
Cluster-23386.0	20.0033	74.8733	2.16755	1.35726e-72	4.06256e-71	up	596
Cluster-15324.0	2.28667	10.7633	2.48617	1.49618e-72	4.47517e-71	up	1796
Cluster-26522.0	18.8833	38.7167	1.28951	2.03785e-72	6.08666e-71	up	1253
Cluster-29129.6	15.05	5.40333	-1.22988	2.31077e-72	6.89197e-71	down	3608
Cluster-17900.0	1.05333	65.9233	6.22466	2.33676e-72	6.96354e-71	up	625
Cluster-25013.2	32.0567	56.9167	1.05478	2.33809e-72	6.96354e-71	up	2042
Cluster-28039.0	19.0567	6.09	-1.44275	2.40185e-72	7.14835e-71	down	2620
Cluster-16338.0	60.35	21.19	-1.25061	5.50879e-72	1.63256e-70	down	1229
Cluster-18835.1	16.9267	45.0167	1.66322	6.20203e-72	1.8367e-70	up	3406
Cluster-36672.12	11.1333	21.3233	1.15131	6.93134e-72	2.04979e-70	up	2520
Cluster-21600.0	56.4433	100.39	1.08598	1.15574e-71	3.41061e-70	up	1133
Cluster-32151.3	43.6633	5.59333	-2.71768	1.21551e-71	3.58446e-70	down	1063
Cluster-21796.0	1.89	6.83333	2.1641	1.5469e-71	4.55531e-70	up	3263
Cluster-19623.1	0.0966667	25.5033	8.35217	1.57089e-71	4.62269e-70	up	1873
Cluster-33872.0	68.7667	17.84	-1.69069	2.08276e-71	6.12469e-70	down	999
Cluster-14087.0	7.58	16.61	1.38235	2.34137e-71	6.87551e-70	up	2455
Cluster-17169.0	8.05333	17.3433	1.35754	2.35034e-71	6.89702e-70	up	2556
Cluster-30426.0	15.1833	2.32333	-2.49905	2.36676e-71	6.94034e-70	down	1940
Cluster-25587.0	1.09	55.0133	5.91812	2.48796e-71	7.29064e-70	up	635
Cluster-28881.0	50.5433	4.4	-3.28022	2.55239e-71	7.47421e-70	down	704
Cluster-740.0	5.21667	0.0566667	-5.99962	2.76308e-71	8.08552e-70	down	5806
Cluster-31585.4	6.08333	17.9533	1.8113	3.38819e-71	9.90093e-70	up	4473
Cluster-20249.0	9.09	23.48	1.62365	5.24587e-71	1.53081e-69	up	2200
Cluster-15325.1	0.0933333	66.8567	9.74878	6.02484e-71	1.7569e-69	up	1420
Cluster-35912.1	7.34333	13.17	1.09347	6.23715e-71	1.81754e-69	up	3844
Cluster-17412.0	4.22333	141.22	5.33352	6.3324e-71	1.84401e-69	up	425
Cluster-35920.0	1.73667	18.8	3.71755	7.34187e-71	2.13649e-69	up	1132
Cluster-17535.0	2.22333	13.5167	2.83267	8.11687e-71	2.36037e-69	up	1861
Cluster-7803.0	0.9	29.3467	5.27736	1.69464e-70	4.91093e-69	up	3139
Cluster-26331.0	48.1733	16.1567	-1.36019	2.2454e-70	6.50251e-69	down	1428
Cluster-31279.0	1.19333	4.08333	2.01958	4.57791e-70	1.32298e-68	up	6282
Cluster-30008.0	34.7367	9.41	-1.63374	4.64688e-70	1.34199e-68	down	1277
Cluster-36830.6	8.06667	96.55	3.84981	5.07876e-70	1.4657e-68	up	544
Cluster-35092.0	59.3567	0.27	-7.66275	7.0407e-70	2.02911e-68	down	1050
Cluster-6813.1	12.4	4.41667	-1.2403	7.4434e-70	2.14369e-68	down	5652
Cluster-5436.0	13.93	58.7033	2.3374	8.18968e-70	2.357e-68	up	615
Cluster-31792.8	2.23	10.4533	2.47449	9.6865e-70	2.78587e-68	up	2692
Cluster-12859.2	50.2967	92.99	1.1446	1.10505e-69	3.17597e-68	up	879
Cluster-4870.1	15.7433	29.9567	1.19846	1.1087e-69	3.18427e-68	up	1860
Cluster-23550.1	65.08	110.123	1.0097	1.20638e-69	3.46246e-68	up	2257
Cluster-37491.1	11.6133	1.61667	-2.48759	1.48737e-69	4.26309e-68	down	2418
Cluster-7872.2	442.2	936.14	1.37438	1.50346e-69	4.30626e-68	up	332
Cluster-35882.7	2.07667	28.1367	4.12508	1.98714e-69	5.67997e-68	up	903
Cluster-22668.1	157.743	59.89	-1.14912	2.21957e-69	6.34002e-68	down	1664
Cluster-19409.8	0.47	4.09667	3.39202	2.44544e-69	6.97091e-68	up	6214
Cluster-28913.0	8.81	18.2833	1.30579	2.63635e-69	7.51002e-68	up	2722
Cluster-30542.5	27.91	10.5967	-1.19805	3.12025e-69	8.88243e-68	down	1946
Cluster-3325.0	5.62	0.11	-5.46154	3.29413e-69	9.37105e-68	down	3755
Cluster-15114.0	11.1533	0.573333	-4.18508	4.55451e-69	1.29214e-67	down	2205
Cluster-10183.0	22.0867	7.53333	-1.30134	5.40752e-69	1.53311e-67	down	2608
Cluster-11335.0	7.42667	13.4	1.10241	6.55842e-69	1.85689e-67	up	4143
Cluster-18645.0	30.1733	10.7133	-1.24166	7.76001e-69	2.19413e-67	down	1831
Cluster-22338.0	2.10667	76.1	5.42864	8.37706e-69	2.3654e-67	up	1495
Cluster-24956.0	11.7	27.56	1.49872	1.15276e-68	3.24626e-67	up	1577
Cluster-27332.1	73.0833	15.52	-1.98095	1.16764e-68	3.28596e-67	down	807
Cluster-24672.1	4.18667	21.28	2.59973	1.25379e-68	3.52602e-67	up	1748
Cluster-34926.3	41.1867	72.3067	1.06146	1.29403e-68	3.63675e-67	up	1782
Cluster-33253.3	0.666667	9.08	4.01782	2.02917e-68	5.69133e-67	up	4296
Cluster-36268.2	7.59333	20.9333	1.71586	3.57495e-68	9.98674e-67	up	1624
Cluster-37090.6	15.9033	0.34	-5.40255	4.90414e-68	1.36725e-66	down	1822
Cluster-3189.0	55.92	10.64	-2.13687	6.37546e-68	1.77626e-66	down	807
Cluster-18824.0	1.19	13.1133	3.71662	6.41266e-68	1.78544e-66	up	1235
Cluster-24778.0	4.54333	107.617	4.842	6.5307e-68	1.8171e-66	up	453
Cluster-575.15	7.04333	0.873333	-2.76565	1.15398e-67	3.20869e-66	down	3358
Cluster-9749.0	10.4867	32.84	1.89076	1.30754e-67	3.63327e-66	up	1111
Cluster-18226.0	2.25	10.0867	2.44337	1.34076e-67	3.7231e-66	up	2610
Cluster-25729.0	13.6033	4.26667	-1.42496	1.96296e-67	5.44363e-66	down	3766
Cluster-27681.0	12.74	33.0467	1.62902	2.66571e-67	7.3876e-66	up	1307
Cluster-18288.2	2.70667	8.31333	1.85576	2.6861e-67	7.43919e-66	up	3631
Cluster-18947.0	0.243333	11.56	5.83869	2.96714e-67	8.21209e-66	up	1935
Cluster-34569.7	29.3633	53.2133	1.1128	4.10678e-67	1.13512e-65	up	1319
Cluster-23267.1	85.7867	18.21	-1.97973	4.22064e-67	1.16583e-65	down	684
Cluster-28601.0	31.2533	69.71	1.41394	4.74494e-67	1.30979e-65	up	1132
Cluster-27419.1	7.94667	16.8	1.31537	4.9689e-67	1.3707e-65	up	3081
Cluster-9965.1	1.37333	32.06	4.84739	5.49083e-67	1.51368e-65	up	860
Cluster-14681.0	19.2767	3.52	-2.21981	5.67909e-67	1.56352e-65	down	1713
Cluster-37280.0	14.0767	2.94	-2.17378	6.9531e-67	1.91302e-65	down	2261
Cluster-17571.0	37.46	10.6467	-1.56435	7.0555e-67	1.93991e-65	down	1464
Cluster-20910.0	13.89	31.05	1.431	7.44679e-67	2.04616e-65	up	2325
Cluster-37955.0	57.6167	23.5167	-1.04223	7.6108e-67	2.08985e-65	down	1777
Cluster-37090.3	16.2033	34.1467	1.32795	1.34495e-66	3.67862e-65	up	1729
Cluster-25028.0	4.88	14.3733	1.81047	1.90509e-66	5.20049e-65	up	2504
Cluster-37234.0	17.3633	4.38	-1.7475	2.02718e-66	5.53018e-65	down	2929
Cluster-36385.8	35.4367	5.50333	-2.43668	2.1586e-66	5.88485e-65	down	1296
Cluster-15102.0	0.54	38.2967	6.40128	2.81223e-66	7.6618e-65	up	783
Cluster-24365.0	3.57	8.56333	1.55058	3.07236e-66	8.36508e-65	up	4260
Cluster-28184.0	3.31333	10.77	1.95251	3.07767e-66	8.3741e-65	up	2409
Cluster-30610.0	31.19	59.2467	1.18035	3.08383e-66	8.38542e-65	up	1181
Cluster-3252.0	59.9133	0.0433333	-10.1482	3.19912e-66	8.69326e-65	down	2479
Cluster-4996.0	21.3367	39.2633	1.13305	3.23868e-66	8.79504e-65	up	1426
Cluster-25137.0	31.03	55.7333	1.09907	3.36123e-66	9.12193e-65	up	1782
Cluster-30467.0	19.8233	63.3633	1.93734	4.25803e-66	1.15408e-64	up	762
Cluster-19552.0	80.0167	27.5133	-1.26374	4.35865e-66	1.18059e-64	down	1666
Cluster-27261.0	21.64	37.1833	1.03326	5.21093e-66	1.40961e-64	up	1699
Cluster-30400.8	13.6033	0.08	-7.31893	7.37806e-66	1.9907e-64	down	2796
Cluster-14055.0	10.3033	21.7667	1.35382	7.57477e-66	2.04114e-64	up	3368
Cluster-17211.0	5.06667	21.2367	2.32124	8.73639e-66	2.35264e-64	up	1107
Cluster-35988.0	38.8	13.1767	-1.27768	1.11533e-65	2.99578e-64	down	2049
Cluster-8854.1	7.95	26.5833	1.98849	1.28255e-65	3.43834e-64	up	1342
Cluster-31987.16	3.73	12.1867	1.96446	1.32511e-65	3.55016e-64	up	2152
Cluster-28945.0	12.94	25.1867	1.20487	1.41042e-65	3.77631e-64	up	2929
Cluster-37826.0	3.31333	11.0733	2.05288	1.45074e-65	3.88178e-64	up	2480
Cluster-26079.0	58.1167	106.54	1.12068	1.4746e-65	3.94308e-64	up	1101
Cluster-32685.0	71.6467	21.9067	-1.47347	2.12856e-65	5.68453e-64	down	2308
Cluster-27767.2	10.7933	20.2067	1.15674	2.16957e-65	5.78668e-64	up	2462
Cluster-28666.0	15.7833	27.95	1.10228	2.20034e-65	5.86501e-64	up	2721
Cluster-15009.0	5.59	12.3133	1.39042	3.0613e-65	8.14434e-64	up	2882
Cluster-6764.0	8.79333	37.0367	2.33028	3.77711e-65	1.00359e-63	up	1458
Cluster-21381.0	38.3833	99.1933	1.62938	4.11863e-65	1.09364e-63	up	941
Cluster-26176.0	11.1433	25.6067	1.46409	4.87482e-65	1.29198e-63	up	1560
Cluster-20316.0	23.4067	42.94	1.13716	5.58531e-65	1.47935e-63	up	2464
Cluster-30568.7	41.6167	12.2833	-1.50997	7.92029e-65	2.09515e-63	down	1150
Cluster-32570.0	10.8733	2.37	-1.95047	1.19238e-64	3.15022e-63	down	3285
Cluster-14774.0	18.27	40.1367	1.3897	1.41893e-64	3.74168e-63	up	1160
Cluster-25713.0	58.56	99.8367	1.02217	1.51465e-64	3.99156e-63	up	1936
Cluster-34794.1	8.70667	21.7267	1.5718	1.51907e-64	4.0007e-63	up	2104
Cluster-18100.0	73.9833	28.8133	-1.10648	1.56252e-64	4.11254e-63	down	1272
Cluster-29594.3	0.78	20.6133	5.02158	1.63894e-64	4.31096e-63	up	1183
Cluster-17931.1	6.01	13.8267	1.45447	1.73208e-64	4.5531e-63	up	2644
Cluster-28533.0	17.34	5.31333	-1.50087	1.80579e-64	4.74388e-63	down	3172
Cluster-911.73	175.96	48.1133	-1.70714	1.90077e-64	4.99026e-63	down	535
Cluster-19822.2	31.9433	12.3133	-1.12498	3.23104e-64	8.46681e-63	down	2409
Cluster-35646.0	2.71333	71.97	4.99847	4.32026e-64	1.1314e-62	up	543
Cluster-24317.0	5.4	9.81667	1.11353	4.57161e-64	1.19498e-62	up	4115
Cluster-37440.4	41.1433	5.72	-2.59484	5.19581e-64	1.3556e-62	down	768
Cluster-26603.2	31.9633	56.2367	1.06741	5.63474e-64	1.46829e-62	up	1657
Cluster-29107.5	5.77	286.48	5.88822	6.08285e-64	1.58408e-62	up	1910
Cluster-28625.2	17.9133	34.25	1.18867	9.17766e-64	2.38557e-62	up	1570
Cluster-16945.0	20.3933	37.4633	1.17265	9.53567e-64	2.47555e-62	up	3187
Cluster-28427.3	26.73	10.7933	-1.05852	1.02012e-63	2.64668e-62	down	2619
Cluster-8702.0	69.5933	26.44	-1.14361	1.22557e-63	3.17776e-62	down	2152
Cluster-17788.0	9.13667	15.8333	1.04459	1.32114e-63	3.42344e-62	up	2957
Cluster-21965.0	21.0533	6.62667	-1.41629	1.45286e-63	3.76244e-62	down	1906
Cluster-38099.1	28.01	8.46667	-1.47282	1.57563e-63	4.07784e-62	down	1454
Cluster-37375.0	2.29	92.7567	5.54711	1.5853e-63	4.10033e-62	up	546
Cluster-22125.0	3.32667	14.0267	2.32884	1.59205e-63	4.11526e-62	up	1612
Cluster-17158.0	22.83	41.6767	1.12191	1.59788e-63	4.12776e-62	up	1387
Cluster-30474.3	11.8333	35.16	1.82632	2.14296e-63	5.53246e-62	up	984
Cluster-25054.0	6.31667	24.1933	2.19282	2.35621e-63	6.07552e-62	up	1013
Cluster-34530.2	28.8567	6.78333	-1.84136	3.12826e-63	8.05632e-62	down	2423
Cluster-11421.12	3.57333	11.83	1.97858	3.14072e-63	8.08344e-62	up	3437
Cluster-4459.1	0.03	40.56	10.8653	3.74463e-63	9.63184e-62	up	3096
Cluster-17174.0	624.103	193.327	-1.31522	4.05347e-63	1.04198e-61	down	741
Cluster-34945.3	0.323333	3.41	3.65906	4.07785e-63	1.04761e-61	up	5452
Cluster-32824.1	1.13333	8.76667	3.20247	4.13866e-63	1.06258e-61	up	5764
Cluster-631.2	14.5567	0.34	-4.78269	4.31092e-63	1.10612e-61	down	2218
Cluster-11128.0	19.1967	34.75	1.10939	6.76211e-63	1.73188e-61	up	1480
Cluster-24115.0	26.4833	5.94333	-1.90174	8.26191e-63	2.11342e-61	down	1743
Cluster-3795.0	0.03	7.77	8.18605	1.05297e-62	2.68533e-61	up	4387
Cluster-27114.0	20.81	8.56667	-1.02966	1.21951e-62	3.10625e-61	down	3942
Cluster-20757.0	11.97	23.81	1.25502	1.39624e-62	3.55425e-61	up	2376
Cluster-25632.0	13.79	4.52333	-1.35782	1.596e-62	4.0603e-61	down	3455
Cluster-30356.1	3.43333	10.8967	1.91761	1.60411e-62	4.07845e-61	up	2284
Cluster-29037.1	16.2833	2.97333	-2.21148	1.69246e-62	4.30048e-61	down	1642
Cluster-24945.0	1.62667	17.37	3.64916	1.95782e-62	4.97171e-61	up	1390
Cluster-37592.4	7.73333	0.193333	-5.13779	2.16399e-62	5.49193e-61	down	2482
Cluster-285.8	0.38	5.90667	4.22714	2.30211e-62	5.83893e-61	up	3343
Cluster-34848.9	3.86333	8.38667	1.40678	2.99342e-62	7.58773e-61	up	5595
Cluster-19669.4	194.24	61.2867	-1.40561	5.13064e-62	1.29659e-60	down	826
Cluster-36846.4	58.86	106.3	1.10415	5.35741e-62	1.35309e-60	up	2691
Cluster-26525.5	19.74	42.08	1.34334	5.81255e-62	1.46715e-60	up	3399
Cluster-37016.5	2.65667	10.49	2.23422	6.73871e-62	1.69888e-60	up	3972
Cluster-588.6	24.0733	11.37	-1.21859	7.44174e-62	1.87499e-60	down	4403
Cluster-20589.1	0.536667	4.52333	3.35729	7.79679e-62	1.96326e-60	up	2946
Cluster-26906.0	1.68667	22.5367	4.00596	8.55923e-62	2.15395e-60	up	887
Cluster-14002.0	44.7433	10.1833	-1.88307	1.2535e-61	3.15067e-60	down	1210
Cluster-13646.0	0.603333	9.12	4.19769	1.47231e-61	3.69622e-60	up	1905
Cluster-18889.0	0.636667	29.5933	5.80248	1.67697e-61	4.20751e-60	up	807
Cluster-19879.2	47.1733	79.61	1.00919	1.98795e-61	4.98178e-60	up	1310
Cluster-21676.1	28.52	6.40667	-1.905	2.07528e-61	5.19751e-60	down	1121
Cluster-15341.0	0.07	41.43	9.79181	2.13125e-61	5.33131e-60	up	1874
Cluster-17715.0	0.443333	5.33	3.83435	2.19135e-61	5.47838e-60	up	2551
Cluster-20136.0	0.236667	6.41	5.02396	3.46719e-61	8.65247e-60	up	2161
Cluster-22413.0	1.24	55.0767	5.73163	3.66973e-61	9.15248e-60	up	633
Cluster-28335.0	0.953333	14.07	4.03376	4.05759e-61	1.01078e-59	up	2158
Cluster-20159.0	7.25333	16.06	1.35148	4.27462e-61	1.06421e-59	up	6045
Cluster-16308.0	15.3033	5.86	-1.1359	4.38102e-61	1.09005e-59	down	3626
Cluster-23443.0	22.19	8.40667	-1.35748	5.24371e-61	1.30315e-59	down	2000
Cluster-26759.0	13.4467	29.2033	1.37965	6.49581e-61	1.61049e-59	up	1659
Cluster-30010.0	20.09	7.29	-1.22137	6.59555e-61	1.63425e-59	down	4180
Cluster-34418.0	6.86667	0.33	-4.2681	6.71615e-61	1.66315e-59	down	2608
Cluster-33376.1	10.35	0.396667	-4.21058	8.24912e-61	2.04035e-59	down	2063
Cluster-35614.0	11.3433	23.7467	1.3198	8.32213e-61	2.0572e-59	up	2538
Cluster-25736.2	16.2333	55.8267	2.04263	1.00193e-60	2.4738e-59	up	915
Cluster-7508.0	39.5	68.8133	1.05643	1.14635e-60	2.82705e-59	up	1034
Cluster-31989.3	8.90667	17.4733	1.2224	2.12851e-60	5.23378e-59	up	3033
Cluster-9626.0	1.94667	76.8233	5.56983	2.39383e-60	5.88273e-59	up	507
Cluster-31353.0	11200.1	3377.39	-1.54327	2.41524e-60	5.93186e-59	down	231
Cluster-18826.0	36.06	66.1967	1.13164	2.4651e-60	6.05077e-59	up	1013
Cluster-31575.0	3.3	1.03667	-1.41611	2.74186e-60	6.72616e-59	down	12217
Cluster-30128.0	76.76	136.903	1.09339	3.33356e-60	8.16811e-59	up	904
Cluster-25149.0	46.65	18.8533	-1.1192	3.67489e-60	8.99918e-59	down	2414
Cluster-25741.7	29.0267	49.51	1.02351	5.35733e-60	1.31039e-58	up	1626
Cluster-33964.10	0.143333	9.56333	6.45987	6.35236e-60	1.55105e-58	up	2105
Cluster-19329.0	8.89667	1.48667	-2.32843	7.89748e-60	1.92607e-58	down	2345
Cluster-18884.0	0.523333	11.0067	4.63504	7.91146e-60	1.92836e-58	up	2184
Cluster-17364.0	48.7867	20.3667	-1.00721	9.87656e-60	2.40454e-58	down	1435
Cluster-35553.0	22.2367	7.21	-1.36411	9.91105e-60	2.41154e-58	down	3205
Cluster-20289.0	10.0167	42.4333	2.34087	1.02574e-59	2.49437e-58	up	952
Cluster-13549.0	4.18667	116.823	5.08252	1.09158e-59	2.65139e-58	up	418
Cluster-35132.0	59.0967	11.69	-2.08979	1.98008e-59	4.79281e-58	down	1470
Cluster-15810.0	3.56667	8.88	1.55333	2.20256e-59	5.32826e-58	up	3627
Cluster-20894.1	25.75	9.87	-1.26818	4.43749e-59	1.07039e-57	down	2779
Cluster-37200.0	13.5133	3.72333	-1.65428	4.6372e-59	1.11792e-57	down	2752
Cluster-20613.0	67.9133	27.68	-1.04195	5.96796e-59	1.43708e-57	down	1476
Cluster-23369.2	1.68667	5.17333	1.86383	6.70895e-59	1.61458e-57	up	4721
Cluster-31268.1	4.29667	12.58	1.80471	6.7541e-59	1.62451e-57	up	1902
Cluster-28886.0	2.32	11.3067	2.53906	6.92086e-59	1.66271e-57	up	1505
Cluster-15762.0	18.5433	4.99333	-1.64482	7.2648e-59	1.74434e-57	down	1951
Cluster-29274.3	5.48333	15.0233	1.70425	8.5539e-59	2.05034e-57	up	2611
Cluster-18459.0	1.24667	7.82	2.89912	9.43837e-59	2.25976e-57	up	2361
Cluster-8590.0	36.68	11.26	-1.47185	9.98558e-59	2.38804e-57	down	1159
Cluster-20095.3	41.57	7.04333	-2.30934	1.03896e-58	2.48323e-57	down	1130
Cluster-613.26	24.3067	1.95667	-5.36939	1.6825e-58	4.01452e-57	down	1397
Cluster-25454.0	2.31667	5.86667	1.61465	1.85394e-58	4.42107e-57	up	5825
Cluster-28541.0	128.68	52.0433	-1.09101	2.68745e-58	6.40506e-57	down	886
Cluster-33941.0	24.2933	6.58333	-1.60239	2.8005e-58	6.6707e-57	down	2044
Cluster-15342.0	19.4333	40.5133	1.31554	3.77459e-58	8.97055e-57	up	988
Cluster-27135.5	9.07	1.01667	-2.91815	5.24673e-58	1.2455e-56	down	2154
Cluster-9321.0	8.85	3.36	-1.14738	5.87187e-58	1.39233e-56	down	6280
Cluster-27044.1	11.03	23.6467	1.34284	5.89443e-58	1.39688e-56	up	1609
Cluster-33022.1	70.89	24.2367	-1.29538	6.81227e-58	1.61348e-56	down	943
Cluster-21633.2	40.6333	69.32	1.03473	7.43627e-58	1.76028e-56	up	894
Cluster-29644.6	2.66333	8.71	2.08008	9.85698e-58	2.33067e-56	up	3200
Cluster-25356.7	13.8767	2.10333	-2.47673	1.0407e-57	2.45933e-56	down	1960
Cluster-34945.4	13.5967	29.6067	1.43954	1.42811e-57	3.37293e-56	up	3005
Cluster-30084.7	15.9633	28.2533	1.07475	1.73157e-57	4.08733e-56	up	2370
Cluster-17137.0	35.26	12.8767	-1.24565	3.40007e-57	7.98977e-56	down	2913
Cluster-31361.3	13.7967	0.79	-3.9124	3.61634e-57	8.49322e-56	down	1404
Cluster-28869.11	9.7	28.1033	1.79048	3.82095e-57	8.9637e-56	up	1406
Cluster-13676.0	0.91	16.5367	4.44552	3.87154e-57	9.07222e-56	up	1059
Cluster-35048.4	0.63	2.37333	2.16522	4.90062e-57	1.1458e-55	up	7349
Cluster-28157.0	11.16	20.33	1.1152	5.56441e-57	1.29955e-55	up	3986
Cluster-26347.2	27.0533	7.61667	-1.57946	5.90739e-57	1.37889e-55	down	2843
Cluster-35577.3	0.113333	28.51	8.29267	6.42049e-57	1.49782e-55	up	1389
Cluster-19300.1	8.24667	18.2633	1.4065	1.03261e-56	2.40358e-55	up	2175
Cluster-25168.0	53.2633	14.7967	-1.59034	1.24322e-56	2.89005e-55	down	1091
Cluster-22052.0	38.1067	15.35	-1.08444	1.62727e-56	3.77309e-55	down	4556
Cluster-31232.4	6.74	15.76	1.4793	2.9696e-56	6.86649e-55	up	2147
Cluster-35208.0	6.91333	38.91	2.75587	2.97881e-56	6.88397e-55	up	682
Cluster-8341.0	18.28	38.2033	1.31565	5.09453e-56	1.17604e-54	up	1579
Cluster-34583.0	5.07	23.9167	2.50418	6.68601e-56	1.54003e-54	up	1000
Cluster-2957.7	30.56	49.9967	1.0493	7.90191e-56	1.81909e-54	up	2725
Cluster-36923.3	1.63333	26.05	4.25382	8.09244e-56	1.86193e-54	up	797
Cluster-15249.0	0.34	8.34	4.87218	9.60177e-56	2.20798e-54	up	1849
Cluster-30995.0	16.6367	40.5467	1.54091	1.14014e-55	2.62037e-54	up	1722
Cluster-33605.1	10.61	20.2467	1.18468	1.2256e-55	2.81524e-54	up	2326
Cluster-26466.0	6.40667	18.7433	1.80103	1.4058e-55	3.2274e-54	up	1985
Cluster-28611.0	4.81667	12.1533	1.61251	1.48337e-55	3.40361e-54	up	3340
Cluster-33089.4	4.11667	14.02	2.01782	1.61464e-55	3.70077e-54	up	3317
Cluster-16199.1	6.32	1.37667	-1.81081	1.97384e-55	4.51418e-54	down	4898
Cluster-25902.1	0.446667	50.5467	7.09659	2.0361e-55	4.65401e-54	up	791
Cluster-18945.0	0.26	5.66	4.73837	2.60899e-55	5.95051e-54	up	2431
Cluster-29603.1	155.857	161.307	1.96996	2.75753e-55	6.28588e-54	up	693
Cluster-36528.10	41.46	15.1467	-1.20147	2.8293e-55	6.44598e-54	down	1559
Cluster-28869.20	11.8567	21.78	1.12793	3.13824e-55	7.14595e-54	up	3285
Cluster-31587.2	2.82333	0.166667	-3.88106	3.88723e-55	8.84182e-54	down	5717
Cluster-32423.4	3.22667	0.246667	-4.89814	4.18229e-55	9.50778e-54	down	4809
Cluster-16661.0	34.0833	7.86	-1.86802	4.22653e-55	9.60314e-54	down	1605
Cluster-36226.0	40.7867	15.3733	-1.15125	6.67851e-55	1.51415e-53	down	1398
Cluster-32824.7	33.1667	6.14	-2.18324	7.67333e-55	1.73875e-53	down	1637
Cluster-29865.0	1.71667	12.77	3.20627	8.42858e-55	1.90885e-53	up	2603
Cluster-32783.5	18.1133	32.4	1.0912	9.10416e-55	2.05963e-53	up	1638
Cluster-37186.6	1.14	3.67	1.94036	1.5363e-54	3.4662e-53	up	7842
Cluster-32097.0	14.17	32.1033	1.40742	1.54216e-54	3.47566e-53	up	2030
Cluster-27067.0	4.38333	11.1467	1.59867	1.75177e-54	3.94595e-53	up	3813
Cluster-29307.1	6.35667	14.2233	1.41239	1.85204e-54	4.16958e-53	up	2473
Cluster-24068.0	13.3333	41.1067	1.8798	1.90251e-54	4.28089e-53	up	942
Cluster-26069.3	16.9467	3.53	-2.01535	2.16024e-54	4.8504e-53	down	1643
Cluster-31620.2	7.86	2.22	-1.52239	2.78107e-54	6.24101e-53	down	3992
Cluster-23575.0	4.48	12.1367	1.69151	3.33326e-54	7.47218e-53	up	2727
Cluster-27065.2	8.19	29.63	2.10924	3.50973e-54	7.86356e-53	up	2452
Cluster-12940.0	52.4833	13.31	-1.71709	5.31996e-54	1.1913e-52	down	1039
Cluster-21157.2	2.17	16.3233	3.19617	5.94004e-54	1.32873e-52	up	1007
Cluster-29277.1	8.70333	18.8433	1.36842	6.17891e-54	1.38143e-52	up	2099
Cluster-28122.1	0.196667	41.0767	8.26104	6.5138e-54	1.45552e-52	up	1051
Cluster-22868.0	5.26667	17.4033	1.96991	8.95496e-54	1.99675e-52	up	2511
Cluster-23729.0	17.0767	6.79333	-1.08297	1.02324e-53	2.28037e-52	down	2829
Cluster-28869.13	26.44	84.8633	1.95405	1.03852e-53	2.3132e-52	up	607
Cluster-16353.0	18.1767	5.88	-1.35726	1.1023e-53	2.45395e-52	down	2089
Cluster-16870.0	59.3467	22.52	-1.14979	1.13394e-53	2.52306e-52	down	1189
Cluster-33173.0	48.4767	18.8767	-1.11342	1.21901e-53	2.70944e-52	down	1802
Cluster-20866.0	29.9167	3.66333	-2.82771	1.32574e-53	2.94512e-52	down	1067
Cluster-13254.0	3.37333	70.0133	4.64668	1.47415e-53	3.2696e-52	up	496
Cluster-11421.7	3.32	8.25	1.56426	1.49446e-53	3.31289e-52	up	2986
Cluster-588.27	15.5867	30.29	1.20927	1.53888e-53	3.40956e-52	up	5440
Cluster-1612.0	10.3967	0.0133333	-9.11306	1.55787e-53	3.4498e-52	down	5920
Cluster-22044.0	8.84	16.0233	1.10995	1.64118e-53	3.63046e-52	up	2570
Cluster-4364.0	0.486667	20.27	5.63762	1.76544e-53	3.9012e-52	up	1009
Cluster-15628.0	3.72667	8.87667	1.5012	1.8685e-53	4.12676e-52	up	2821
Cluster-37606.5	0.3	44.2933	7.57289	2.91976e-53	6.44179e-52	up	811
Cluster-36830.0	2.48667	77.9133	5.31802	3.16842e-53	6.98303e-52	up	468
Cluster-29754.2	22.26	45.3067	1.27763	4.49439e-53	9.90019e-52	up	1595
Cluster-21019.0	50.24	18.02	-1.22341	5.21897e-53	1.14842e-51	down	1017
Cluster-24022.4	24.0267	8.22	-1.31446	8.35328e-53	1.8333e-51	down	2119
Cluster-11868.0	19.2733	0.0133333	-9.90236	8.47558e-53	1.85917e-51	down	6066
Cluster-33031.10	4.87333	0.24	-4.11545	1.00341e-52	2.19644e-51	down	3070
Cluster-31075.20	25.9567	10.2867	-1.48485	1.07449e-52	2.35081e-51	down	2698
Cluster-30164.1	0.343333	3.86	3.75909	1.12591e-52	2.46201e-51	up	3628
Cluster-28040.0	27.7667	47.2467	1.02269	1.17919e-52	2.57717e-51	up	1349
Cluster-3317.0	22.5067	38.52	1.0286	1.34964e-52	2.94661e-51	up	1527
Cluster-34062.2	32.7233	68.02	1.31097	1.37339e-52	2.9969e-51	up	1298
Cluster-17880.0	20.5967	51.6867	1.58333	1.64317e-52	3.58373e-51	up	1063
Cluster-30089.0	126.867	48.7267	-1.11893	1.70097e-52	3.70786e-51	down	639
Cluster-12869.3	0.436667	21.7833	6.05499	1.70716e-52	3.71943e-51	up	1028
Cluster-28843.1	16.17	5.28	-1.35878	1.73222e-52	3.77206e-51	down	3660
Cluster-4623.0	3.31333	14.8133	2.41286	2.32354e-52	5.04659e-51	up	1278
Cluster-12955.0	40.7467	15.8467	-1.10991	2.56666e-52	5.57175e-51	down	1489
Cluster-25975.2	0.543333	9.58667	4.4499	3.68115e-52	7.98282e-51	up	1592
Cluster-13234.0	14.0367	4.94	-1.26245	3.71262e-52	8.04688e-51	down	3377
Cluster-18198.0	34.5033	58.2667	1.01265	4.30328e-52	9.31265e-51	up	1278
Cluster-34417.1	15.89	5.86667	-1.18751	4.34434e-52	9.3918e-51	down	3470
Cluster-21915.1	20.5433	6.54333	-1.39996	4.35955e-52	9.41981e-51	down	2651
Cluster-32678.2	13.6333	27.3267	1.25546	4.38134e-52	9.46201e-51	up	1336
Cluster-22279.5	8.39667	17.1167	1.28016	4.83906e-52	1.04344e-50	up	1995
Cluster-20812.1	9.54	20.82	1.26179	5.16959e-52	1.11414e-50	up	2800
Cluster-11302.0	7.38	27.9	2.15777	5.3132e-52	1.14391e-50	up	1069
Cluster-14831.9	39.4433	15.15	-1.13315	5.38831e-52	1.15948e-50	down	2319
Cluster-7796.0	1.57333	5.83	2.14074	6.4242e-52	1.38168e-50	up	2667
Cluster-35943.4	39.3767	15.8867	-1.05748	8.22377e-52	1.76329e-50	down	1638
Cluster-19035.0	2.16667	39.5733	4.45122	8.54149e-52	1.83047e-50	up	723
Cluster-30259.1	0.11	149.703	10.9435	8.90599e-52	1.90761e-50	up	964
Cluster-24690.1	2.01	9.39333	2.48225	1.1629e-51	2.48072e-50	up	2424
Cluster-15508.0	1.34333	35.08	4.97433	1.17978e-51	2.51545e-50	up	697
Cluster-22923.0	9.29	50.8733	2.71593	1.34037e-51	2.85347e-50	up	696
Cluster-6642.0	17.3833	2.69333	-2.43689	1.59545e-51	3.39135e-50	down	1499
Cluster-23154.0	7.88333	16.7733	1.3494	1.6838e-51	3.57369e-50	up	2079
Cluster-21734.0	45.8933	17.4933	-1.15106	2.15327e-51	4.56779e-50	down	3119
Cluster-697.7	18.7433	2.06333	-2.94183	2.54632e-51	5.39066e-50	down	1260
Cluster-4557.0	18.6067	6.02	-1.37747	2.96607e-51	6.27295e-50	down	2546
Cluster-15418.0	19.66	44.45	1.4333	3.25695e-51	6.88465e-50	up	1015
Cluster-29901.0	52.7167	20.8933	-1.12625	3.85737e-51	8.14151e-50	down	2829
Cluster-18427.0	22.8433	9.22333	-1.05682	3.90326e-51	8.23421e-50	down	2409
Cluster-11421.4	0.386667	7.39667	4.58939	4.02552e-51	8.48785e-50	up	1664
Cluster-29707.11	3.52667	9.68667	1.71075	4.88125e-51	1.02766e-49	up	2049
Cluster-21778.2	15.0033	39.7567	1.65953	5.15166e-51	1.08405e-49	up	1951
Cluster-38140.4	7.96	0.283333	-4.61935	5.89583e-51	1.23877e-49	down	1954
Cluster-13668.4	3.66	9.42	1.61604	6.57527e-51	1.37946e-49	up	3851
Cluster-17262.0	20.85	8.56667	-1.0572	7.82342e-51	1.64049e-49	down	2392
Cluster-28178.0	63.21	25.84	-1.04104	7.8333e-51	1.64174e-49	down	1957
Cluster-34434.0	0.336667	3.09667	3.45295	8.13378e-51	1.70386e-49	up	3520
Cluster-30574.4	13.06	24.62	1.16582	8.32623e-51	1.74331e-49	up	2702
Cluster-35776.5	6.00333	14.3333	1.50841	1.01458e-50	2.11793e-49	up	2355
Cluster-36187.1	3.15	10.5167	1.9943	1.05032e-50	2.19144e-49	up	2258
Cluster-35425.1	0.533333	7.00333	4.41686	1.10402e-50	2.30234e-49	up	2643
Cluster-19150.0	13.9167	1.91	-2.58908	1.58633e-50	3.30485e-49	down	1398
Cluster-19060.0	61.04	129.257	1.34289	1.60804e-50	3.34721e-49	up	645
Cluster-14666.3	72.0133	142.48	1.24484	1.64688e-50	3.42418e-49	up	661
Cluster-27989.2	8.28333	20.6233	1.56893	2.19948e-50	4.56636e-49	up	2677
Cluster-21054.0	17.95	32.7667	1.10475	2.20426e-50	4.57401e-49	up	1917
Cluster-4629.0	67.0067	23.9167	-1.22957	2.3217e-50	4.81532e-49	down	956
Cluster-269.1	10.54	0.0166667	-8.84403	2.42218e-50	5.02124e-49	down	6010
Cluster-21020.5	4.15	10.1133	1.50913	2.73957e-50	5.67637e-49	up	4060
Cluster-23875.0	26.1167	8.49667	-1.36929	2.94396e-50	6.09501e-49	down	1380
Cluster-19728.0	54.93	20.4267	-1.17104	2.94453e-50	6.09501e-49	down	977
Cluster-27831.0	1.30333	30.3967	4.81884	3.00237e-50	6.21167e-49	up	1236
Cluster-15158.0	29.57	10.12	-1.29379	3.06685e-50	6.34195e-49	down	1515
Cluster-35244.5	10.1567	18.0767	1.08061	4.75363e-50	9.80583e-49	up	2594
Cluster-34909.1	11.9567	2.39333	-2.07623	4.91611e-50	1.0136e-48	down	2441
Cluster-16931.0	32.9333	11.0833	-1.31658	6.80963e-50	1.40262e-48	down	1177
Cluster-12181.0	37.5667	79.0033	1.36186	6.83265e-50	1.40667e-48	up	1032
Cluster-16349.0	0.493333	18.3833	5.46818	6.8481e-50	1.40847e-48	up	968
Cluster-18128.1	2.16333	24.6033	3.76256	7.34425e-50	1.50903e-48	up	940
Cluster-8302.0	16.56	4.98	-1.48309	7.36514e-50	1.51258e-48	down	2122
Cluster-25455.4	4.85333	12.8867	1.66264	8.60255e-50	1.76325e-48	up	2364
Cluster-21157.1	31.5933	2.74	-3.28682	9.3833e-50	1.9214e-48	down	751
Cluster-17610.0	27.1767	45.8533	1.00616	9.86575e-50	2.01821e-48	up	1387
Cluster-21879.4	27.16	11.1333	-1.03477	1.03408e-49	2.11437e-48	down	2225
Cluster-9174.0	0.186667	10.4767	6.05754	1.28203e-49	2.62007e-48	up	1630
Cluster-37076.0	5.10333	12.5367	1.37319	1.60883e-49	3.28472e-48	up	5042
Cluster-14916.0	3.81333	11.9133	1.89479	1.63614e-49	3.33886e-48	up	2049
Cluster-23731.0	29.6467	13.0867	-1.16039	1.65083e-49	3.36719e-48	down	3584
Cluster-37396.11	39.63	3.88333	-3.10888	1.65286e-49	3.3697e-48	down	650
Cluster-32784.6	17.9867	32.8433	1.12853	1.88406e-49	3.83731e-48	up	1230
Cluster-35603.2	6.52	16.49	1.64163	2.04164e-49	4.15422e-48	up	2948
Cluster-9618.0	9.68	43.4467	2.42906	2.11462e-49	4.29854e-48	up	665
Cluster-15731.0	32.0067	12.2833	-1.12881	2.36519e-49	4.80321e-48	down	1585
Cluster-20878.1	7.34667	12.11	1.11909	2.7418e-49	5.56533e-48	up	5640
Cluster-23147.0	40.4367	12.33	-1.41316	2.75984e-49	5.59924e-48	down	3157
Cluster-37698.0	38.74	116.407	2.05464	2.76127e-49	5.59943e-48	up	500
Cluster-18476.0	10.6967	1.35	-2.74216	2.80016e-49	5.67554e-48	down	1736
Cluster-24437.2	0.8	9.92	3.91872	2.98729e-49	6.0519e-48	up	1213
Cluster-22501.0	21.5333	54.7233	1.59642	3.02613e-49	6.12761e-48	up	1069
Cluster-18515.0	1.69	8.87333	2.6491	3.34039e-49	6.75743e-48	up	1487
Cluster-19447.4	0.833333	39.0933	5.83254	3.74397e-49	7.5702e-48	up	1942
Cluster-36071.1	23.13	1.97	-3.31332	3.80688e-49	7.69367e-48	down	1397
Cluster-26364.0	14.5733	27.1367	1.14001	4.00864e-49	8.09752e-48	up	1426
Cluster-21354.0	9.49333	21.4467	1.42722	4.10417e-49	8.2865e-48	up	1651
Cluster-9863.0	3.11667	9.16333	1.80888	4.27924e-49	8.63581e-48	up	3129
Cluster-18133.0	1.36333	7.88667	2.63643	4.79598e-49	9.67397e-48	up	2995
Cluster-29940.0	20.93	36.4833	1.05511	5.23752e-49	1.05494e-47	up	1377
Cluster-33204.0	0.116667	4.43667	5.48501	5.49832e-49	1.10693e-47	up	2997
Cluster-27896.4	5.44333	9.42	1.04355	5.53929e-49	1.11465e-47	up	4102
Cluster-25957.0	16.88	32.0767	1.12231	5.86546e-49	1.17915e-47	up	3655
Cluster-32245.0	7.97	16.9167	1.3272	6.08448e-49	1.22259e-47	up	2724
Cluster-33090.2	20.4	67.5	1.96673	6.13309e-49	1.23177e-47	up	797
Cluster-30616.0	9.61667	27.9933	1.78974	9.097e-49	1.81831e-47	up	1172
Cluster-37596.0	25.61	4.80333	-2.1332	9.43888e-49	1.88575e-47	down	1286
Cluster-12730.0	0.0133333	7.94333	9.5603	1.02793e-48	2.05169e-47	up	6049
Cluster-20737.0	5.36333	14.74	1.71151	1.06714e-48	2.12792e-47	up	2030
Cluster-17371.0	63.6767	24.3067	-1.21391	1.18827e-48	2.36609e-47	down	1534
Cluster-36923.1	1.33	22.83	4.40201	1.35861e-48	2.70399e-47	up	811
Cluster-19671.0	15.8167	32.0333	1.27041	1.44314e-48	2.86949e-47	up	1700
Cluster-30400.6	4.29667	36.79	3.34968	1.46428e-48	2.90876e-47	up	3082
Cluster-36164.0	53.54	0.12	-8.68464	1.47796e-48	2.93455e-47	down	1140
Cluster-36760.0	18.7267	4.66	-1.81023	1.51382e-48	3.00432e-47	down	2469
Cluster-21248.0	10.2633	2.58333	-1.7391	1.59303e-48	3.16002e-47	down	2462
Cluster-26247.0	2.92	141.6	5.82576	1.78682e-48	3.54276e-47	up	1689
Cluster-34583.7	9.83333	24.58	1.5908	1.95601e-48	3.87455e-47	up	1895
Cluster-36130.0	5.20667	12.78	1.54402	2.06732e-48	4.0931e-47	up	4312
Cluster-37302.3	0.243333	3.61667	4.19934	2.24375e-48	4.43821e-47	up	4672
Cluster-11466.1	27.0133	47.86	1.07975	2.31068e-48	4.56844e-47	up	1300
Cluster-27555.8	0.313333	14.9467	6.0111	2.67841e-48	5.288e-47	up	1162
Cluster-28629.1	2.62667	7.17667	1.74705	2.8665e-48	5.65402e-47	up	2946
Cluster-20275.1	16.5633	28.2367	1.01908	3.10385e-48	6.11642e-47	up	2612
Cluster-20379.0	3.48333	12.9833	2.15152	3.16314e-48	6.23032e-47	up	1688
Cluster-17035.2	25.73	58.2467	1.44686	3.49566e-48	6.8788e-47	up	784
Cluster-28095.0	35.7167	9.19333	-1.69927	4.03336e-48	7.92944e-47	down	1332
Cluster-33895.2	11.9433	23.7733	1.2452	4.04888e-48	7.95621e-47	up	2972
Cluster-22862.2	15.32	12.2167	1.33349	4.07203e-48	7.99796e-47	up	2935
Cluster-36591.9	44.3867	15.1033	-1.30281	4.24341e-48	8.33066e-47	down	1018
Cluster-17705.2	12.4267	42.9533	2.04281	4.63177e-48	9.08456e-47	up	1771
Cluster-8364.4	48.1633	11.9633	-1.75841	4.87434e-48	9.55585e-47	down	1249
Cluster-25356.4	30.3433	11.4933	-1.15154	5.00129e-48	9.80014e-47	down	4176
Cluster-35568.9	9.35667	2.82333	-1.4794	5.08246e-48	9.95454e-47	down	3314
Cluster-18355.0	26.28	51.7033	1.23308	6.54755e-48	1.28061e-46	up	1018
Cluster-37592.1	15.0633	0.246667	-5.82303	7.78646e-48	1.52079e-46	down	1321
Cluster-24770.0	32.9667	12.24	-1.17735	9.46569e-48	1.84705e-46	down	1717
Cluster-32151.2	18.2867	8.83667	-1.3561	1.06289e-47	2.06921e-46	down	1911
Cluster-22159.1	33.8267	12.64	-1.16756	1.22173e-47	2.37512e-46	down	1365
Cluster-12669.0	13.8867	1.62333	-2.84036	1.45813e-47	2.83337e-46	down	1416
Cluster-16754.0	2.15333	15.2	3.09277	1.51736e-47	2.9471e-46	up	945
Cluster-33089.5	3.72333	11.36	1.86384	1.61734e-47	3.13838e-46	up	3329
Cluster-22981.1	3.32667	16.0567	2.53744	1.67421e-47	3.24723e-46	up	1586
Cluster-35616.0	20.8567	36.1533	1.04613	1.69733e-47	3.29053e-46	up	2122
Cluster-25269.0	31.7367	11.3633	-1.26237	1.75542e-47	3.40001e-46	down	2153
Cluster-8075.6	9.76333	1.18	-3.35704	2.49348e-47	4.82062e-46	down	1816
Cluster-31232.6	1.63667	7.75333	2.50914	2.80228e-47	5.41511e-46	up	1896
Cluster-28869.17	1.96333	6.56	1.9963	3.13421e-47	6.05374e-46	up	2908
Cluster-27715.7	2.85	0.246667	-3.28885	3.77823e-47	7.2943e-46	down	4944
Cluster-24940.0	9.93	3.78667	-1.13929	4.62733e-47	8.91714e-46	down	3745
Cluster-33999.4	21.4867	5.22333	-1.48007	4.66676e-47	8.98899e-46	down	3750
Cluster-23638.2	14.9133	37.19	1.57489	4.96959e-47	9.56349e-46	up	964
Cluster-36064.0	29.05	53.6633	1.13805	6.20034e-47	1.19155e-45	up	1115
Cluster-19957.0	16.9967	3.63	-1.97236	7.40798e-47	1.42233e-45	down	1366
Cluster-17320.3	7.70667	17.9633	1.4726	7.54106e-47	1.44721e-45	up	2341
Cluster-11421.2	1.93333	9.57667	2.24886	9.81456e-47	1.88266e-45	up	1913
Cluster-33141.4	65.3733	1.41667	-5.2806	1.02197e-46	1.95858e-45	down	1499
Cluster-37713.4	5.93	15.8067	1.66584	1.18599e-46	2.26877e-45	up	3858
Cluster-10409.0	46.9033	90.8367	1.21759	1.3389e-46	2.55894e-45	up	605
Cluster-26894.2	2.55667	0.226667	-3.26132	1.34025e-46	2.55924e-45	down	7848
Cluster-18576.1	17.18	7.11667	-1.06228	1.59971e-46	3.05184e-45	down	6231
Cluster-31229.0	18.5967	7.76333	-1.01674	2.34674e-46	4.46884e-45	down	4319
Cluster-17338.0	1.19333	8.66	3.11382	2.4258e-46	4.60891e-45	up	1607
Cluster-11276.0	11.47	27.4633	1.51425	2.48267e-46	4.71268e-45	up	1155
Cluster-24454.1	39.63	85.65	1.37781	2.57269e-46	4.88135e-45	up	587
Cluster-1457.10	7.08333	2.3	-1.39359	2.59659e-46	4.92446e-45	down	4253
Cluster-13737.0	21.5633	4.5	-2.00706	2.87665e-46	5.45068e-45	down	1399
Cluster-38094.1	5.97	0.92	-2.30372	3.21161e-46	6.0826e-45	down	5274
Cluster-18620.0	13.17	4.72667	-1.22735	3.42015e-46	6.46877e-45	down	3344
Cluster-32219.4	35.54	115.97	1.95948	4.31848e-46	8.16417e-45	up	1055
Cluster-19190.0	0.503333	3.68333	3.11901	4.46698e-46	8.4411e-45	up	3084
Cluster-32198.0	3.34333	9.32333	1.67979	4.61082e-46	8.70897e-45	up	2597
Cluster-25473.0	16.38	4.44	-1.6659	4.75291e-46	8.96927e-45	down	1918
Cluster-9625.0	35.6767	12.7133	-1.24248	5.70656e-46	1.07592e-44	down	1251
Cluster-25787.0	1.65667	13.92	3.37016	5.94649e-46	1.12065e-44	up	1614
Cluster-30093.0	25.3833	9.67667	-1.13844	6.1482e-46	1.15815e-44	down	2295
Cluster-14765.0	10.43	20.3167	1.2138	6.21247e-46	1.1692e-44	up	2130
Cluster-36261.11	3.73	14.83	2.20903	6.89084e-46	1.29629e-44	up	1354
Cluster-21424.0	5.98667	36.8567	2.8288	7.29033e-46	1.37021e-44	up	639
Cluster-37507.0	16.2733	33.6667	1.31768	7.6632e-46	1.43964e-44	up	2250
Cluster-34523.0	19.2967	5.75	-1.4971	7.70949e-46	1.44769e-44	down	2329
Cluster-22829.0	8.07667	27.8167	2.00875	8.34939e-46	1.56645e-44	up	949
Cluster-22729.1	9.6	28.9567	1.8442	8.38436e-46	1.5723e-44	up	1226
Cluster-32601.1	9.72	33.86	2.05673	8.43668e-46	1.58141e-44	up	1155
Cluster-13765.8	23.1433	9.32667	-1.08745	8.63006e-46	1.61693e-44	down	3487
Cluster-2957.6	3.07	8.45333	1.71597	9.13255e-46	1.70878e-44	up	2296
Cluster-34742.9	3.51	0.35	-3.09955	1.0707e-45	2.0007e-44	down	4949
Cluster-22817.0	6.20333	12.77	1.29133	1.15691e-45	2.15986e-44	up	2633
Cluster-16828.0	41.88	14.7733	-1.25833	1.21459e-45	2.26653e-44	down	2379
Cluster-7786.0	0.46	18.6733	5.59758	1.35026e-45	2.51746e-44	up	955
Cluster-6914.1	8.94667	19.6967	1.3382	1.64316e-45	3.05946e-44	up	3315
Cluster-1801.2	50.6333	8.87333	-2.25091	1.65786e-45	3.08546e-44	down	681
Cluster-7088.0	18.55	4.86667	-1.67608	1.76876e-45	3.28601e-44	down	1408
Cluster-18395.0	0.693333	2.94	2.33882	1.82509e-45	3.38917e-44	up	7598
Cluster-21184.0	3.90333	0.306667	-3.40267	1.84647e-45	3.42592e-44	down	3218
Cluster-30133.2	0.57	3.51333	2.89172	1.84652e-45	3.42592e-44	up	3412
Cluster-15468.0	21.6333	7.05	-1.36659	2.01873e-45	3.74377e-44	down	2003
Cluster-33767.1	7.67333	0.266667	-4.61667	2.20436e-45	4.08621e-44	down	2173
Cluster-26420.0	18.1867	42.9967	1.4799	2.58071e-45	4.77962e-44	up	1689
Cluster-32129.0	32.8133	10.9167	-1.33494	2.66278e-45	4.92508e-44	down	1464
Cluster-29754.6	28.8967	8.08333	-1.58769	2.72568e-45	5.03919e-44	down	1579
Cluster-21818.0	1.51667	7.42333	2.53822	2.86396e-45	5.29018e-44	up	2126
Cluster-17849.0	3.51	12.71	2.10707	3.02079e-45	5.5774e-44	up	1775
Cluster-10868.0	78.0067	31.1467	-1.06743	3.18189e-45	5.87226e-44	down	1218
Cluster-34439.0	24.54	9.3	-1.14838	3.31344e-45	6.11234e-44	down	1602
Cluster-16671.0	0.173333	5.35	5.18878	3.62163e-45	6.67499e-44	up	2379
Cluster-37025.0	17.1067	3.98333	-1.85805	4.24261e-45	7.80577e-44	down	1320
Cluster-33617.7	23.1167	6.91	-1.48781	4.48105e-45	8.24084e-44	down	1717
Cluster-29019.1	42.7867	15.4367	-1.21845	4.54508e-45	8.35493e-44	down	1536
Cluster-21751.0	0.266667	5.41333	4.5014	5.54656e-45	1.0178e-43	up	2317
Cluster-30084.4	9.14	20.2167	1.39855	5.91247e-45	1.08447e-43	up	1630
Cluster-28846.0	11.16	3.50333	-1.57043	5.9693e-45	1.09442e-43	down	2946
Cluster-17032.0	0.0166667	7.36667	9.17322	6.03928e-45	1.10676e-43	up	5043
Cluster-19036.0	0.15	4.89	5.35122	6.91771e-45	1.26663e-43	up	2438
Cluster-16216.0	18.6567	57.5967	1.88956	9.54212e-45	1.74411e-43	up	604
Cluster-8461.0	15.85	32.7867	1.30316	1.24594e-44	2.27535e-43	up	1111
Cluster-17936.0	14.3433	25.48	1.10117	1.25712e-44	2.29476e-43	up	3378
Cluster-25175.0	10.2167	2.11667	-2.01747	1.27707e-44	2.33016e-43	down	2448
Cluster-28625.5	0.123333	1.83667	4.18411	1.31331e-44	2.39525e-43	up	5457
Cluster-26309.2	21.46	6.33667	-1.51209	1.38893e-44	2.52985e-43	down	2197
Cluster-35541.0	29.0067	66.3433	1.59076	1.53074e-44	2.78574e-43	up	717
Cluster-23747.0	12.6	5.16667	-1.03782	1.78832e-44	3.25166e-43	down	5486
Cluster-5571.0	87.9067	34.9867	-1.07263	2.18834e-44	3.97213e-43	down	1028
Cluster-25626.0	7.96	0.516667	-3.69613	2.67041e-44	4.84294e-43	down	1761
Cluster-3884.0	9.13	28.86	1.91693	3.0329e-44	5.49557e-43	up	1028
Cluster-34260.6	3.93667	9.50667	1.55953	3.16916e-44	5.73999e-43	up	4026
Cluster-33369.1	0.07	66.4467	10.142	3.49132e-44	6.3153e-43	up	1311
Cluster-17318.0	28.6767	9	-1.42315	3.86864e-44	6.99177e-43	down	1216
Cluster-30004.5	7.71333	23.34	1.85001	4.04472e-44	7.30685e-43	up	2097
Cluster-15148.1	13.7867	3.90667	-1.56984	4.75098e-44	8.57902e-43	down	2020
Cluster-13405.0	7.97667	14.8233	1.13607	5.03721e-44	9.09196e-43	up	2058
Cluster-17622.0	8.19	24.5033	1.83157	8.32796e-44	1.49928e-42	up	1171
Cluster-33889.1	19.4267	7.74333	-1.07884	8.40688e-44	1.51284e-42	down	4741
Cluster-32617.2	11.92	20.2433	1.016	8.51854e-44	1.53228e-42	up	2767
Cluster-34111.5	0.436667	2.21667	2.58876	8.60753e-44	1.54762e-42	up	4987
Cluster-27455.1	4.76333	12.2367	1.6063	9.03479e-44	1.62374e-42	up	2316
Cluster-10684.0	0.493333	3.45667	3.05344	9.58234e-44	1.72141e-42	up	3706
Cluster-13334.0	14.8967	4.50667	-1.47198	1.078e-43	1.93573e-42	down	2414
Cluster-17721.0	15.44	27.15	1.06657	1.22962e-43	2.20515e-42	up	1903
Cluster-31143.12	6.82333	2.53	-1.18169	1.48493e-43	2.6596e-42	down	4616
Cluster-10745.0	0.91	10.1567	3.73683	1.52533e-43	2.7308e-42	up	1277
Cluster-8651.0	1.02333	25.15	4.88448	1.61215e-43	2.88499e-42	up	656
Cluster-32249.6	9.87	16.7833	1.01649	2.12582e-43	3.80259e-42	up	4426
Cluster-11380.5	68.8533	135.503	1.234	2.22435e-43	3.97714e-42	up	868
Cluster-31792.1	0.24	4.63667	4.61987	2.24022e-43	4.0021e-42	up	2055
Cluster-13841.0	46.6933	12.8967	-1.59815	2.33659e-43	4.17248e-42	down	938
Cluster-9508.1	110.347	35.1033	-1.38671	2.35043e-43	4.19541e-42	down	603
Cluster-23003.0	1.28	14.8167	3.79032	2.51128e-43	4.48061e-42	up	1139
Cluster-24069.0	19.81	6.48	-1.3622	2.55183e-43	4.55102e-42	down	2060
Cluster-35775.2	39.93	76.33	1.18695	3.09072e-43	5.50975e-42	up	969
Cluster-12212.2	17.7133	6.30667	-1.32697	3.39511e-43	6.0498e-42	down	2458
Cluster-29794.0	0.13	22.03	7.68507	3.41609e-43	6.0846e-42	up	1133
Cluster-27317.8	5.26667	0.253333	-4.174	3.98683e-43	7.09212e-42	down	5340
Cluster-10430.0	74.8933	29.1567	-1.10311	4.15261e-43	7.38388e-42	down	851
Cluster-21627.0	1.53	14.0067	3.45675	4.53952e-43	8.06502e-42	up	2793
Cluster-21981.0	24.0833	40.8433	1.01509	4.63232e-43	8.2229e-42	up	1196
Cluster-17990.0	10.3833	18.6433	1.09897	4.93328e-43	8.74603e-42	up	2256
Cluster-2971.0	12.04	23.5867	1.22207	4.98176e-43	8.82824e-42	up	1730
Cluster-31353.20	135.07	36.52	-1.61613	5.0496e-43	8.94467e-42	down	520
Cluster-15832.7	1.76667	5.92667	1.99726	5.19783e-43	9.20335e-42	up	5417
Cluster-29530.0	0.246667	2.42	3.59061	5.87227e-43	1.038e-41	up	4399
Cluster-15310.0	25.5733	9.52333	-1.16236	5.95678e-43	1.05249e-41	down	1629
Cluster-28691.0	38.9467	13.1433	-1.33976	5.99112e-43	1.05811e-41	down	1472
Cluster-19447.6	0.106667	6.77333	6.31116	6.2337e-43	1.10049e-41	up	2027
Cluster-28346.3	6.89667	1.35	-2.10959	6.72363e-43	1.18598e-41	down	2948
Cluster-15654.1	13.1567	23.1033	1.11468	7.30203e-43	1.28692e-41	up	1595
Cluster-31129.0	1.68	0.0533333	-4.81301	7.47472e-43	1.31625e-41	down	7349
Cluster-30140.0	28.6	11.6933	-1.03761	7.64988e-43	1.34653e-41	down	2134
Cluster-28349.0	5.99333	12.3967	1.29792	7.77189e-43	1.36743e-41	up	3395
Cluster-33391.7	3.14	9.63333	1.87381	9.4901e-43	1.66764e-41	up	2442
Cluster-35221.0	21.8867	7.98333	-1.21218	9.70231e-43	1.70421e-41	down	3554
Cluster-31201.0	44.17	75.26	1.01791	9.81665e-43	1.72357e-41	up	1078
Cluster-23335.1	0.0366667	27.4233	10.013	1.07685e-42	1.8899e-41	up	2145
Cluster-28203.0	6.09	126.137	4.64287	1.1256e-42	1.97298e-41	up	456
Cluster-18913.0	0.183333	3.42667	4.46853	1.15463e-42	2.02217e-41	up	2691
Cluster-23010.1	2.17	6.26667	1.78285	1.21663e-42	2.12898e-41	up	4682
Cluster-27449.1	2.04	7.31	2.0867	1.24147e-42	2.17153e-41	up	2341
Cluster-18235.0	2.38	42.1967	4.40242	1.3596e-42	2.37618e-41	up	1741
Cluster-32714.1	0.713333	6.88333	3.54527	1.54699e-42	2.70255e-41	up	1558
Cluster-14951.0	45.83	17.0467	-1.16898	1.66442e-42	2.90648e-41	down	1295
Cluster-27904.0	0.0666667	46.7367	9.91525	1.86398e-42	3.25226e-41	up	1325
Cluster-36015.0	30.1267	82.3433	1.72101	2.02298e-42	3.52675e-41	up	545
Cluster-14068.0	8.12667	16.1767	1.24372	2.12727e-42	3.70393e-41	up	2208
Cluster-15487.0	0.386667	6.40667	4.29787	2.20378e-42	3.83554e-41	up	1731
Cluster-34377.1	21.5633	5.25667	-1.78711	2.23863e-42	3.89459e-41	down	1846
Cluster-32737.0	9.96333	0.45	-4.28716	2.59652e-42	4.51159e-41	down	1361
Cluster-32956.1	21.9067	1.37333	-3.73506	2.73047e-42	4.7404e-41	down	801
Cluster-26082.0	6.73333	17.06	1.87471	2.9658e-42	5.14469e-41	up	1687
Cluster-20595.0	1.37667	49.7633	5.4278	3.35103e-42	5.80093e-41	up	1960
Cluster-33400.7	43.5467	94.1933	1.37789	3.38487e-42	5.85708e-41	up	958
Cluster-37274.0	5.88667	1.05	-2.23766	3.40327e-42	5.88648e-41	down	4871
Cluster-28077.0	13.2467	27.5067	1.29672	3.58505e-42	6.19578e-41	up	1695
Cluster-18693.0	1.19667	3.17667	1.6534	3.9574e-42	6.83647e-41	up	6204
Cluster-21137.0	0.143333	9.78667	6.3954	3.99324e-42	6.89554e-41	up	1470
Cluster-15303.0	0.136667	9.06667	6.32792	4.43546e-42	7.65285e-41	up	1849
Cluster-28697.2	28.7467	55.1	1.19452	4.7403e-42	8.17546e-41	up	1076
Cluster-34368.0	10.3833	3.40667	-1.34926	5.81834e-42	1.00141e-40	down	3312
Cluster-30648.2	0.486667	58.17	7.18685	7.68095e-42	1.3209e-40	up	2199
Cluster-36629.2	16.6233	2.58	-2.44352	7.85156e-42	1.34858e-40	down	1455
Cluster-8909.6	12.94	3.18333	-1.76392	7.8962e-42	1.35569e-40	down	2530
Cluster-24857.0	5.77667	10.7667	1.14101	8.13818e-42	1.39609e-40	up	2834
Cluster-12962.0	0.19	4.32667	4.7561	8.74374e-42	1.49814e-40	up	2207
Cluster-26151.0	1.48333	12.73	3.37646	9.02016e-42	1.54423e-40	up	1248
Cluster-26274.2	6.30667	14.59	1.46337	9.31511e-42	1.59343e-40	up	2969
Cluster-5432.1	100.347	36.67	-1.18541	9.68807e-42	1.65654e-40	down	1232
Cluster-37130.0	9.21667	2.47	-1.63192	1.01756e-41	1.73919e-40	down	3187
Cluster-32397.2	20.6267	8.18	-1.17488	1.03883e-41	1.77482e-40	down	2499
Cluster-36094.0	6.26	15.22	1.52232	1.15233e-41	1.96794e-40	up	1611
Cluster-21247.0	6.93333	0.0533333	-6.75087	1.24783e-41	2.13016e-40	down	2774
Cluster-14139.0	11.77	2.25333	-2.1518	1.26185e-41	2.15235e-40	down	1656
Cluster-37172.0	0.57	3.18	2.64756	1.26977e-41	2.16497e-40	up	4531
Cluster-34707.0	38.3633	2.78667	-3.68146	1.28312e-41	2.18684e-40	down	629
Cluster-37559.6	3.27	9.59	1.81384	1.42687e-41	2.42985e-40	up	1809
Cluster-35915.0	27.8767	10.0867	-1.21413	1.53546e-41	2.61372e-40	down	1885
Cluster-12536.7	23.9	9.50333	-1.24708	1.75701e-41	2.98841e-40	down	2740
Cluster-11847.0	131.9	235.993	1.10274	1.76217e-41	2.99533e-40	up	647
Cluster-17004.0	14.5267	25.2133	1.04803	1.76251e-41	2.99533e-40	up	1980
Cluster-21186.0	19.4767	6.76667	-1.25519	1.84726e-41	3.13809e-40	down	2212
Cluster-34717.1	5.18	0.3	-3.92681	1.89017e-41	3.20968e-40	down	2644
Cluster-33553.3	1.15333	5.34	2.47631	1.99618e-41	3.38558e-40	up	3139
Cluster-6872.0	29.9767	11.3167	-1.15787	2.27858e-41	3.85985e-40	down	1500
Cluster-26758.0	15.7067	6.56667	-1.03134	2.47593e-41	4.18908e-40	down	3262
Cluster-23440.0	20.3267	5.8	-1.55137	2.69076e-41	4.55071e-40	down	1354
Cluster-15433.0	14.1767	1.78667	-2.77972	2.81168e-41	4.74946e-40	down	2352
Cluster-26023.0	18.3067	33.39	1.12025	2.89615e-41	4.89017e-40	up	1736
Cluster-26385.0	18.2733	3.53333	-2.24212	2.91556e-41	4.92095e-40	down	1193
Cluster-29747.0	0.636667	11.4533	4.47734	3.01777e-41	5.09143e-40	up	1012
Cluster-31129.6	2.58	11.6833	2.42884	3.17469e-41	5.35401e-40	up	4225
Cluster-17598.0	20.6967	6.94333	-1.32406	4.08543e-41	6.87058e-40	down	1671
Cluster-23737.0	7.93333	19.1733	1.59934	4.09341e-41	6.88123e-40	up	4449
Cluster-18719.0	10.36	20.98	1.27107	4.16277e-41	6.99502e-40	up	1344
Cluster-21915.3	13.0233	4.90333	-1.16019	4.23104e-41	7.10689e-40	down	2798
Cluster-35481.1	0	174.147	15.8148	4.41032e-41	7.40506e-40	up	2527
Cluster-27067.1	0.536667	3.46	2.95108	4.60553e-41	7.72663e-40	up	4159
Cluster-35137.0	32.08	4.22	-2.6818	5.08382e-41	8.5154e-40	down	1038
Cluster-10425.0	87.1967	33.3733	-1.13148	5.53437e-41	9.26265e-40	down	1453
Cluster-35299.1	7.68333	12.9833	1.02894	6.69107e-41	1.11762e-39	up	2561
Cluster-27478.0	73.32	28.8233	-1.10769	7.09609e-41	1.1848e-39	down	949
Cluster-20489.0	12.2567	26.47	1.36547	7.12242e-41	1.18873e-39	up	1118
Cluster-27107.2	18.32	33.2267	1.15065	8.06248e-41	1.34509e-39	up	1700
Cluster-14364.0	5.44667	70.7533	3.97414	8.44273e-41	1.4074e-39	up	462
Cluster-35010.7	1.43333	3.89667	1.69262	8.95828e-41	1.49275e-39	up	5422
Cluster-18083.3	996.333	2.26	-8.54795	9.84856e-41	1.63914e-39	down	835
Cluster-17246.2	23.5733	45.1933	1.19663	9.92613e-41	1.6514e-39	up	915
Cluster-23515.0	4.19333	9.14667	1.38185	1.0288e-40	1.71024e-39	up	2833
Cluster-26288.0	0.653333	4.04	2.86425	1.06548e-40	1.76981e-39	up	2525
Cluster-30980.6	11.16	30.9967	1.73122	1.08753e-40	1.80501e-39	up	903
Cluster-37184.2	22.4067	8.62667	-1.12794	1.15394e-40	1.91296e-39	down	2409
Cluster-32410.0	0.606667	2.48333	2.28701	1.1768e-40	1.95009e-39	up	6099
Cluster-22252.0	0.26	6.76	4.95739	1.21704e-40	2.01516e-39	up	1491
Cluster-35309.24	36.2733	13.9333	-1.79097	1.24479e-40	2.06031e-39	down	1318
Cluster-614.1	0.706667	10.1633	4.14703	1.29123e-40	2.13547e-39	up	1234
Cluster-25178.0	21.36	7.23	-1.3963	1.42456e-40	2.35505e-39	down	2443
Cluster-38088.4	14.7233	0.0333333	-8.66867	1.42692e-40	2.35803e-39	down	2816
Cluster-33407.0	17.14	44.8833	1.63902	1.54779e-40	2.55575e-39	up	870
Cluster-19447.3	1.80333	81.63	5.77238	1.65133e-40	2.72565e-39	up	454
Cluster-32438.0	11.34	2	-2.3302	1.72501e-40	2.84613e-39	down	1794
Cluster-6165.0	9.12	27.5967	1.7913	2.06353e-40	3.40199e-39	up	928
Cluster-33629.0	38.3233	15.8267	-1.04808	2.12874e-40	3.50673e-39	down	1743
Cluster-8854.0	167.343	313.94	1.16073	2.16493e-40	3.56494e-39	up	525
Cluster-29517.0	22.96	44.91	1.22409	2.40487e-40	3.95073e-39	up	1055
Cluster-32378.2	12.5133	4.83	-1.25838	2.47595e-40	4.0659e-39	down	2711
Cluster-13389.1	6.73	14.1733	1.25715	2.51708e-40	4.13182e-39	up	3713
Cluster-15293.1	24.1167	0.193333	-6.99538	2.67597e-40	4.39091e-39	down	1074
Cluster-21768.1	49.5467	16.8833	-1.2946	2.94709e-40	4.832e-39	down	817
Cluster-37209.0	9.56	2.76	-1.38612	3.04384e-40	4.98869e-39	down	3952
Cluster-35415.0	22.2033	37.14	1.01702	3.08394e-40	5.05113e-39	up	3542
Cluster-21257.5	25.1067	54.93	1.28411	3.17854e-40	5.20334e-39	up	2538
Cluster-34720.0	14.6867	4.07667	-1.60141	3.34099e-40	5.46713e-39	down	2850
Cluster-19404.0	0.0933333	4.77667	5.90979	3.5178e-40	5.75197e-39	up	2598
Cluster-25570.0	0.796667	4.60667	2.97156	3.64894e-40	5.96406e-39	up	2566
Cluster-33348.0	5.99667	1.67667	-1.70369	3.95733e-40	6.46307e-39	down	5793
Cluster-4913.4	0.713333	2.38333	1.99206	4.57259e-40	7.45918e-39	up	7172
Cluster-11804.0	3.16667	41.4033	3.97859	4.88446e-40	7.96482e-39	up	545
Cluster-25686.0	9.11	34.6067	2.15501	4.91163e-40	8.00602e-39	up	1496
Cluster-24681.0	7.93	17.9367	1.39835	5.65862e-40	9.20569e-39	up	1660
Cluster-28391.0	33.4167	63.9067	1.167	6.01636e-40	9.78388e-39	up	1807
Cluster-26469.6	1.2	15.8067	4.01503	6.70755e-40	1.0891e-38	up	936
Cluster-4528.0	8.22	20.73	1.58954	6.79169e-40	1.10191e-38	up	1178
Cluster-17994.0	16.3133	43.83	1.68596	6.90399e-40	1.11969e-38	up	710
Cluster-22114.0	0.743333	14.8967	4.58421	7.09413e-40	1.15008e-38	up	796
Cluster-34851.0	6.83333	14.6433	1.36215	7.22343e-40	1.17059e-38	up	3247
Cluster-28649.0	4.25333	9.20667	1.44934	8.82633e-40	1.42869e-38	up	4654
Cluster-24936.0	72.44	19.6267	-1.62287	9.40125e-40	1.52116e-38	down	771
Cluster-18114.1	0.103333	1.97667	4.60175	9.87058e-40	1.59525e-38	up	4487
Cluster-20037.0	9.39333	2.46333	-1.67815	1.06061e-39	1.71346e-38	down	2291
Cluster-33504.3	6.97667	18.79	1.79045	1.16404e-39	1.87911e-38	up	2676
Cluster-36025.2	1.13	9.17	3.06809	1.1933e-39	1.9256e-38	up	1752
Cluster-33262.0	19.9133	4.80333	-1.80809	1.22497e-39	1.97594e-38	down	1560
Cluster-31732.0	23.7633	45.5367	1.15628	1.39099e-39	2.24203e-38	up	2176
Cluster-3633.0	6.18667	19.52	1.91324	1.41576e-39	2.28106e-38	up	1029
Cluster-28328.2	5.13333	12.6333	1.62106	1.85215e-39	2.97845e-38	up	2059
Cluster-34440.2	12.19	3.08667	-1.7373	1.97517e-39	3.17384e-38	down	1696
Cluster-12832.0	26.5933	51.13	1.30608	2.05182e-39	3.29574e-38	up	1051
Cluster-31851.14	1.23	8.75333	3.10233	2.14111e-39	3.4339e-38	up	1349
Cluster-31711.1	41.01	16.3433	-1.11705	2.19166e-39	3.51362e-38	down	1853
Cluster-36130.4	16.9433	35.7467	1.32917	2.21863e-39	3.5555e-38	up	1597
Cluster-18120.0	6.55667	13.4	1.28266	2.27836e-39	3.64982e-38	up	3075
Cluster-31412.1	0.433333	2.48667	2.78017	3.33325e-39	5.32138e-38	up	8001
Cluster-15459.0	15.0267	3.94333	-1.6781	3.35729e-39	5.35772e-38	down	1655
Cluster-6632.0	0.44	36.85	6.6405	3.39021e-39	5.40819e-38	up	624
Cluster-9459.0	0.296667	14.66	5.87573	3.51552e-39	5.59956e-38	up	1004
Cluster-37375.2	1.99333	52.41	4.98048	3.55456e-39	5.65959e-38	up	532
Cluster-18785.0	33.75	13.8033	-1.03828	4.17702e-39	6.63553e-38	down	1543
Cluster-18653.0	6.15	13.5067	1.38717	4.97039e-39	7.8839e-38	up	1612
Cluster-14652.0	64.5667	11.5233	-2.22566	5.59093e-39	8.85813e-38	down	767
Cluster-31353.8	106.553	0	-15.4143	5.75035e-39	9.10726e-38	down	4284
Cluster-23540.1	13.4767	0.553333	-4.38327	6.00801e-39	9.50814e-38	down	1174
Cluster-35373.7	0.143333	16.6633	7.16691	6.05515e-39	9.57912e-38	up	3242
Cluster-12869.1	0.606667	20.5733	5.33849	6.17503e-39	9.7614e-38	up	733
Cluster-285.1	3.01667	6.03333	1.24876	6.31253e-39	9.97499e-38	up	6137
Cluster-13376.0	55.78	9.82333	-2.23788	7.01375e-39	1.10747e-37	down	585
Cluster-31322.3	21.3567	8.85333	-1.0216	7.77698e-39	1.22706e-37	down	2063
Cluster-22079.1	5.51333	13.23	1.52964	8.99035e-39	1.4169e-37	up	2172
Cluster-30164.0	0.356667	2.80333	3.25643	9.12082e-39	1.43692e-37	up	3538
Cluster-15703.2	13.3167	31.66	1.60605	1.04296e-38	1.64126e-37	up	1714
Cluster-36723.0	7.87	19.9	1.59664	1.27252e-38	2.00025e-37	up	1511
Cluster-31987.1	0.753333	4.15333	2.72713	1.28188e-38	2.01421e-37	up	2943
Cluster-25495.4	9.57667	18.86	1.21552	1.37482e-38	2.15702e-37	up	2180
Cluster-11328.0	1.14667	4.65	2.27013	1.37784e-38	2.16094e-37	up	2588
Cluster-24751.2	3.71	0.366667	-3.12373	1.42929e-38	2.2408e-37	down	3170
Cluster-7896.0	1.22	4.76333	2.22585	1.51404e-38	2.37188e-37	up	2402
Cluster-1700.3	16.7233	0.0233333	-9.4103	1.55303e-38	2.43114e-37	down	3196
Cluster-36329.6	8.91	0.45	-4.10828	1.62533e-38	2.54337e-37	down	1656
Cluster-33699.0	4.42	12.3267	1.73618	1.73307e-38	2.71096e-37	up	1625
Cluster-21249.1	107.587	31.8233	-1.48608	1.79531e-38	2.80727e-37	down	1387
Cluster-37699.0	6.43333	14.9367	1.46814	1.8437e-38	2.88186e-37	up	2177
Cluster-32325.1	7.17333	14.0667	1.22445	1.90159e-38	2.97123e-37	up	5786
Cluster-3873.0	12.6567	1.29333	-3.18595	1.99997e-38	3.12262e-37	down	1343
Cluster-28162.4	35.01	6.50333	-2.17065	2.23874e-38	3.49282e-37	down	1472
Cluster-18493.0	38.1233	74.1667	1.22364	2.28378e-38	3.56177e-37	up	609
Cluster-16350.0	14.9133	28.52	1.11866	2.36394e-38	3.6854e-37	up	2510
Cluster-6388.0	17.7367	1.70667	-2.99273	2.47522e-38	3.85746e-37	down	1269
Cluster-18952.0	0.12	2.31333	4.50903	2.76256e-38	4.30206e-37	up	4235
Cluster-26306.0	14.41	5.91333	-1.03814	2.82735e-38	4.39967e-37	down	3922
Cluster-32371.5	1.24	5.72	2.46129	2.923e-38	4.54683e-37	up	4304
Cluster-37184.7	18.25	6.41667	-1.25644	2.92809e-38	4.55306e-37	down	2283
Cluster-21095.0	92.0033	37.7867	-1.03005	2.93727e-38	4.56564e-37	down	1175
Cluster-29633.0	17.5233	31.66	1.10321	3.04292e-38	4.72811e-37	up	1337
Cluster-26085.0	2.82	21.2967	3.17521	3.09025e-38	4.79985e-37	up	709
Cluster-21798.0	7.06333	22.9033	1.96013	3.44267e-38	5.34328e-37	up	1095
Cluster-14074.0	2.11	12.72	2.82672	3.67843e-38	5.70497e-37	up	1874
Cluster-34945.18	0.646667	2.48333	2.19854	3.96804e-38	6.1473e-37	up	4473
Cluster-24759.0	12.2067	4.51667	-1.19893	4.00473e-38	6.20185e-37	down	3999
Cluster-31075.2	28.5767	56.2233	1.22801	4.36327e-38	6.75211e-37	up	3480
Cluster-36292.0	2.34333	5.15	1.35875	4.57412e-38	7.07577e-37	up	4282
Cluster-37025.4	20.9833	0.536667	-5.17769	4.629e-38	7.15803e-37	down	878
Cluster-22925.0	30.6433	10.7067	-1.27775	5.63473e-38	8.71001e-37	down	1753
Cluster-3498.0	0.943333	4.68	2.56387	6.68613e-38	1.032e-36	up	2501
Cluster-22542.1	0.01	20.56	10.7885	7.02195e-38	1.08304e-36	up	4515
Cluster-11829.0	2.52333	9.94667	2.23064	7.15875e-38	1.10332e-36	up	2123
Cluster-26466.1	7.48333	0.146667	-5.43028	8.55123e-38	1.31648e-36	down	1946
Cluster-17002.0	0.826667	3.69667	2.41245	8.75817e-38	1.34735e-36	up	4034
Cluster-12869.5	0.623333	13.7133	4.82362	9.11204e-38	1.40091e-36	up	903
Cluster-19086.0	4.41667	8.58333	1.21046	9.113e-38	1.40091e-36	up	2965
Cluster-17529.2	2.78333	8.83333	1.91845	9.40265e-38	1.44384e-36	up	2029
Cluster-26743.0	10.83	2.27	-1.9979	9.44095e-38	1.44919e-36	down	1976
Cluster-24531.0	3.19333	59.3433	4.47935	1.05385e-37	1.61589e-36	up	593
Cluster-32100.4	4.37667	12.65	1.78339	1.11923e-37	1.71551e-36	up	3625
Cluster-32487.4	11.1767	0.156667	-6.17475	1.21508e-37	1.8597e-36	down	1465
Cluster-33804.9	13.5933	2.48333	-2.20908	1.21642e-37	1.86107e-36	down	2728
Cluster-27936.0	1.16333	10.82	3.47309	1.23633e-37	1.89085e-36	up	1022
Cluster-34552.0	13.2567	4.94333	-1.1782	1.67309e-37	2.5551e-36	down	2356
Cluster-5691.0	19.5133	6.85667	-1.25764	1.67883e-37	2.56293e-36	down	2393
Cluster-28537.0	16.9133	46.8833	1.73266	1.71522e-37	2.61657e-36	up	622
Cluster-33014.0	32.3667	7.89333	-1.7776	1.73321e-37	2.64305e-36	down	967
Cluster-36395.2	0.543333	3.94333	3.0768	2.26931e-37	3.4568e-36	up	4892
Cluster-16570.4	3.90667	8.75	1.41556	2.59523e-37	3.95039e-36	up	3287
Cluster-16550.0	5.38667	10.97	1.27691	3.0023e-37	4.56339e-36	up	2020
Cluster-23210.0	20.3	2.00667	-3.09849	3.43725e-37	5.21503e-36	down	897
Cluster-23556.10	114.093	222.657	1.23238	3.52088e-37	5.33997e-36	up	585
Cluster-30532.1	18.24	81.6567	2.41662	4.1786e-37	6.32606e-36	up	1887
Cluster-20546.1	5.41	10.1933	1.16477	4.3306e-37	6.55381e-36	up	2980
Cluster-27854.2	1.49	4.02333	1.70373	5.53956e-37	8.3683e-36	up	3467
Cluster-13745.0	13.4533	4.52	-1.21115	6.0624e-37	9.14163e-36	down	3382
Cluster-2791.1	20.5733	6.70333	-1.4244	6.21592e-37	9.36975e-36	down	1602
Cluster-26666.3	20.0833	7.88333	-1.09689	6.60918e-37	9.95538e-36	down	2494
Cluster-14506.0	3.03	48.4867	4.30465	7.38335e-37	1.11175e-35	up	713
Cluster-33845.0	19.9833	7.73667	-1.11841	8.38347e-37	1.26098e-35	down	3501
Cluster-4663.0	0.816667	5.00667	2.86385	8.76163e-37	1.31739e-35	up	2165
Cluster-3038.0	47.48	14.64	-1.43855	9.08687e-37	1.36482e-35	down	786
Cluster-38156.1	11.21	26.0633	1.51789	9.45177e-37	1.41861e-35	up	1382
Cluster-20025.0	0.126667	3.25667	4.95116	9.75677e-37	1.46387e-35	up	2506
Cluster-23680.0	27.7633	49.5	1.08852	1.01246e-36	1.51851e-35	up	1275
Cluster-27569.7	1.94	10.77	2.73364	1.04496e-36	1.56669e-35	up	1164
Cluster-29193.0	76.24	0.68	-6.59747	1.05708e-36	1.58429e-35	down	1535
Cluster-4900.0	1.22333	33.93	5.0576	1.17542e-36	1.75914e-35	up	673
Cluster-19395.6	8.77667	2.48	-1.57675	1.19988e-36	1.7951e-35	down	2979
Cluster-31232.7	9.33	23.64	1.59113	1.22183e-36	1.82729e-35	up	2497
Cluster-16142.0	9.4	69.9667	3.17134	1.3061e-36	1.95122e-35	up	436
Cluster-37061.0	1.4	7.42	2.65699	1.32444e-36	1.97722e-35	up	4554
Cluster-29650.3	2.03333	7.63667	2.16958	1.41128e-36	2.1046e-35	up	2416
Cluster-30296.3	11.24	19.6	1.11667	1.47186e-36	2.19182e-35	up	1892
Cluster-25803.1	242.07	59.0633	-1.75845	1.50321e-36	2.23692e-35	down	387
Cluster-25564.1	1.09333	356.577	8.62967	1.5131e-36	2.25084e-35	up	1322
Cluster-19392.0	13.4867	31.1767	1.45712	1.58781e-36	2.36113e-35	up	928
Cluster-25323.0	0.0733333	81.9967	10.5391	1.61208e-36	2.39637e-35	up	986
Cluster-24953.0	25.58	44.2033	1.04632	2.03245e-36	3.01804e-35	up	846
Cluster-6459.0	0.31	10.4	5.31951	2.19583e-36	3.2595e-35	up	1163
Cluster-22665.5	4.24	0.42	-3.10848	2.52199e-36	3.73703e-35	down	2542
Cluster-21713.0	0.22	2.92667	4.00729	2.54905e-36	3.77578e-35	up	3033
Cluster-36027.0	5.98	18.87	1.71794	3.00908e-36	4.45091e-35	up	3437
Cluster-30128.1	25.8267	48.72	1.17344	3.51753e-36	5.19199e-35	up	760
Cluster-17746.0	0.773333	5.78667	3.15292	3.52826e-36	5.20598e-35	up	1515
Cluster-19494.0	7.02	18.7767	1.683	3.53276e-36	5.21079e-35	up	1879
Cluster-23104.0	69.7167	112.237	1.06067	3.97099e-36	5.85099e-35	up	751
Cluster-28601.4	2.12333	5.98	1.7468	4.0047e-36	5.89859e-35	up	2704
Cluster-31178.3	0	91.5033	14.7879	4.03403e-36	5.9397e-35	up	2382
Cluster-19183.1	0.0866667	2.86667	5.82888	4.24885e-36	6.2538e-35	up	3454
Cluster-31232.3	17.0533	30.4833	1.0909	4.89631e-36	7.19667e-35	up	2386
Cluster-14188.0	0.176667	3.67333	4.64125	5.10851e-36	7.50592e-35	up	2208
Cluster-24039.2	21.4233	8.22667	-1.12889	5.33685e-36	7.83867e-35	down	1646
Cluster-31281.0	3.77667	12.65	1.98683	5.47918e-36	8.04491e-35	up	1755
Cluster-31909.1	0.88	7.76333	3.39744	5.53697e-36	8.12691e-35	up	2543
Cluster-14640.1	5.99667	12.14	1.28301	6.13519e-36	8.99863e-35	up	1968
Cluster-16405.0	1.75333	7.55	2.48302	6.14055e-36	9.00335e-35	up	3794
Cluster-37314.0	11.0767	3.35333	-1.32581	6.14915e-36	9.0128e-35	down	2970
Cluster-36329.4	9.77667	0.1	-6.43476	6.3986e-36	9.37186e-35	down	1727
Cluster-37317.9	16.0867	1.77	-2.95159	6.45666e-36	9.45358e-35	down	957
Cluster-26233.4	15.2067	3.49333	-1.87989	7.03694e-36	1.02924e-34	down	1253
Cluster-16542.1	14.2467	1.67333	-2.84121	7.26353e-36	1.06201e-34	down	1106
Cluster-11150.0	0.453333	13.99	5.19439	7.64599e-36	1.11754e-34	up	1180
Cluster-17360.4	0.366667	4.96667	4.10547	7.73008e-36	1.12904e-34	up	1958
Cluster-27824.1	12.2333	26.59	1.37523	8.31764e-36	1.21275e-34	up	1423
Cluster-24806.0	1.22	10.86	3.40598	8.38332e-36	1.2219e-34	up	1297
Cluster-36095.2	27.18	10.2933	-1.15015	8.91515e-36	1.29851e-34	down	1359
Cluster-36261.10	0.473333	4.03	3.3532	9.18888e-36	1.33792e-34	up	3965
Cluster-286.3	12.83	3.5	-1.64949	9.73489e-36	1.41643e-34	down	2073
Cluster-32286.3	55.6767	22.5233	-1.05213	1.20341e-35	1.74732e-34	down	1064
Cluster-26085.1	3.16667	13.6167	2.35243	1.35875e-35	1.9715e-34	up	957
Cluster-27854.1	14.7233	0.283333	-5.48549	1.53391e-35	2.22181e-34	down	1078
Cluster-18687.0	30.9433	10.49	-1.263	1.5634e-35	2.26374e-34	down	3440
Cluster-11192.2	9.93	17.97	1.10709	1.74661e-35	2.52814e-34	up	1872
Cluster-36857.3	0.08	3.61667	5.92389	1.84717e-35	2.67186e-34	up	2760
Cluster-37213.5	7.4	1.5	-2.12505	1.86873e-35	2.70211e-34	down	2589
Cluster-25712.6	7.20333	13.6333	1.17289	1.90455e-35	2.75296e-34	up	2052
Cluster-29021.3	18.5967	34.1067	1.12778	1.94147e-35	2.80534e-34	up	1843
Cluster-34223.1	2.21	6.52667	1.81698	2.03698e-35	2.94133e-34	up	3185
Cluster-25736.0	0.166667	24.4467	7.69032	2.0622e-35	2.97672e-34	up	943
Cluster-37638.1	9.37333	2.27	-1.79816	2.13751e-35	3.08437e-34	down	2823
Cluster-15756.0	5.65	1.39333	-1.80707	2.23333e-35	3.22043e-34	down	3264
Cluster-35648.10	8.17	0.856667	-3.00451	2.34065e-35	3.37284e-34	down	2623
Cluster-11781.0	38.8533	11.84	-1.45719	2.75918e-35	3.96774e-34	down	807
Cluster-25941.2	10.9	3.55667	-1.41828	2.79885e-35	4.02341e-34	down	3472
Cluster-13713.0	1.19667	9.84	3.30519	2.82665e-35	4.06059e-34	up	1102
Cluster-37301.11	12.47	2.09333	-2.48361	2.86949e-35	4.12071e-34	down	1878
Cluster-22954.2	7.04333	1.48667	-1.99921	2.9449e-35	4.22756e-34	down	2318
Cluster-37491.2	25.9333	10.29	-1.08133	2.97773e-35	4.27175e-34	down	1342
Cluster-36316.1	13.0267	2.49667	-2.14022	3.05849e-35	4.3861e-34	down	1529
Cluster-31203.2	12.09	2.46667	-2.04602	3.10317e-35	4.44866e-34	down	2054
Cluster-33328.11	5.82333	11.6967	1.28556	3.15995e-35	4.52696e-34	up	3502
Cluster-37217.4	4.27	0.843333	-2.10843	3.29197e-35	4.71286e-34	down	3263
Cluster-20527.5	16.3967	3.24	-2.0936	3.35438e-35	4.80056e-34	down	1199
Cluster-35609.2	30.4733	12.7267	-1.00819	3.44479e-35	4.92322e-34	down	1462
Cluster-33880.1	0.19	4.73333	4.96984	3.705e-35	5.29331e-34	up	2169
Cluster-35309.15	33.6167	11.1067	-1.76236	4.63137e-35	6.61004e-34	down	1139
Cluster-24840.0	8.25	1.84	-1.91545	5.46292e-35	7.78625e-34	down	2075
Cluster-16575.1	8.28667	2.22333	-1.63015	5.58206e-35	7.95335e-34	down	2900
Cluster-21273.0	44.8733	18.3967	-1.03226	5.87512e-35	8.36805e-34	down	1273
Cluster-23201.3	6.21333	16.3067	1.64273	6.97929e-35	9.91041e-34	up	4184
Cluster-17384.0	7.60333	3.15667	-1.01819	7.50755e-35	1.06569e-33	down	5856
Cluster-2636.3	2.1	5.41333	1.65343	7.64216e-35	1.08443e-33	up	4940
Cluster-17035.0	19.6533	45.9633	1.47936	7.85024e-35	1.11358e-33	up	823
Cluster-37676.0	0.396667	45.6233	7.03339	7.88172e-35	1.11767e-33	up	1822
Cluster-18072.0	6.81	16.1467	1.49824	8.12483e-35	1.15136e-33	up	1502
Cluster-16285.4	0.633333	3.68667	2.80096	8.53595e-35	1.20921e-33	up	3678
Cluster-18053.0	2.27667	9.78333	2.36563	9.04885e-35	1.281e-33	up	1594
Cluster-28144.0	2.56	8.72333	1.74455	9.29427e-35	1.3153e-33	up	4151
Cluster-23074.10	0.0233333	9.14667	8.94796	9.33792e-35	1.32103e-33	up	2930
Cluster-29340.0	41.22	13.04	-1.40155	9.34556e-35	1.32167e-33	down	1447
Cluster-22403.0	8.47	23.8433	1.75019	9.90242e-35	1.39995e-33	up	960
Cluster-34584.7	0.51	2.81333	2.72552	1.04557e-34	1.47767e-33	up	4644
Cluster-38088.5	5.13333	11.7233	1.44466	1.09205e-34	1.54232e-33	up	2380
Cluster-32093.0	5.57333	1.11333	-2.03822	1.22349e-34	1.72678e-33	down	2988
Cluster-15087.0	2.07667	11.08	2.67259	1.24931e-34	1.76263e-33	up	1196
Cluster-34945.14	0.2	1.30667	2.98704	1.38593e-34	1.95275e-33	up	6977
Cluster-25060.4	0.113333	0.733333	2.97756	1.49887e-34	2.11047e-33	up	9912
Cluster-14731.0	31.65	10.2667	-1.37126	1.55676e-34	2.19124e-33	down	1460
Cluster-21469.0	8.69333	2.90333	-1.33168	1.69785e-34	2.38903e-33	down	3251
Cluster-20990.1	9.10667	2.31333	-1.59441	1.75335e-34	2.46547e-33	down	3304
Cluster-12881.0	7.86	0.653333	-3.32915	2.04098e-34	2.86702e-33	down	1450
Cluster-18584.0	14.1233	5.44667	-1.12152	2.21887e-34	3.11586e-33	down	2333
Cluster-25189.1	0.25	27.0967	7.01154	2.27459e-34	3.19304e-33	up	732
Cluster-37023.2	0.05	1.93	5.62192	2.39936e-34	3.36594e-33	up	4318
Cluster-27449.0	11.7567	20.1033	1.02465	2.48775e-34	3.48877e-33	up	2403
Cluster-21127.4	26.53	0.0466667	-8.89529	2.68796e-34	3.76701e-33	down	1589
Cluster-13701.0	0.226667	8.54	5.48451	2.85389e-34	3.99687e-33	up	1278
Cluster-25784.0	21.5233	0.483333	-5.14289	3.02592e-34	4.23073e-33	down	855
Cluster-28328.3	1.93	6.55	2.05134	3.0997e-34	4.33245e-33	up	1808
Cluster-22108.0	29.2267	12.16	-1.03659	3.66255e-34	5.11402e-33	down	1765
Cluster-26127.0	1.12667	4.52333	2.23003	3.6729e-34	5.12676e-33	up	2439
Cluster-12689.0	89.0533	31.0667	-1.24654	3.77428e-34	5.26476e-33	down	911
Cluster-26476.2	6.06333	11.58	1.18462	4.00975e-34	5.58949e-33	up	2086
Cluster-36846.2	0.103333	2.65667	5.15032	4.11298e-34	5.72767e-33	up	2908
Cluster-32996.0	7.65667	2.98333	-1.10717	4.16873e-34	5.80337e-33	down	6030
Cluster-13389.3	1.56	3.49333	1.4196	4.17274e-34	5.80702e-33	up	5056
Cluster-35401.2	15.4467	0.05	-8.0738	4.30658e-34	5.98931e-33	down	1859
Cluster-12536.6	10.19	0.186667	-5.59273	4.53252e-34	6.29935e-33	down	1331
Cluster-19576.0	12.8567	4.36	-1.31693	4.83482e-34	6.71503e-33	down	2318
Cluster-29546.0	1.93667	6.31667	1.89321	4.8929e-34	6.79344e-33	up	2350
Cluster-3555.0	0.47	21.2733	5.76385	5.47477e-34	7.59881e-33	up	730
Cluster-4655.0	0.0166667	3.52333	8.01102	5.90412e-34	8.19202e-33	up	4734
Cluster-30295.1	9.1	19.52	1.34543	5.92295e-34	8.21543e-33	up	2107
Cluster-10804.8	9.76	18.2633	1.15467	6.90426e-34	9.57021e-33	up	3213
Cluster-16160.1	37.27	8.46667	-1.88075	7.30376e-34	1.01206e-32	down	916
Cluster-30405.0	2.41333	6.02	1.58135	7.63911e-34	1.05748e-32	up	2723
Cluster-6071.0	0.446667	7.28	4.27411	7.7825e-34	1.07662e-32	up	1193
Cluster-25849.0	0.04	3.01667	6.24766	7.82376e-34	1.08161e-32	up	3541
Cluster-23297.0	7.16667	1.36667	-2.14134	7.92617e-34	1.09541e-32	down	2033
Cluster-11844.1	5.56333	0.686667	-2.74879	8.07979e-34	1.1159e-32	down	2192
Cluster-18234.0	10.2067	3.77333	-1.18643	8.40142e-34	1.15994e-32	down	3273
Cluster-13151.0	4.95667	0.88	-2.26051	8.90145e-34	1.22857e-32	down	2526
Cluster-30820.0	12.61	35.4267	1.74964	8.99411e-34	1.24095e-32	up	808
Cluster-15086.0	1.24	3.01	1.52574	9.11037e-34	1.25658e-32	up	6195
Cluster-33605.3	3.79	10.0667	1.6538	9.32324e-34	1.28509e-32	up	2020
Cluster-13615.0	179.753	57.8667	-1.36604	1.06596e-33	1.46737e-32	down	542
Cluster-28741.1	0.763333	11.4333	4.21513	1.12826e-33	1.55159e-32	up	1134
Cluster-27715.6	5.33667	10.3167	1.20259	1.24971e-33	1.71691e-32	up	3377
Cluster-30889.1	12.21	25.6233	1.31182	1.25978e-33	1.73018e-32	up	1367
Cluster-25870.0	19.71	7.13667	-1.20106	1.30487e-33	1.79152e-32	down	2177
Cluster-35529.12	8.63667	18.56	1.36223	1.32623e-33	1.82025e-32	up	1162
Cluster-16681.0	19.9767	95.0533	2.52435	1.3877e-33	1.904e-32	up	440
Cluster-18310.3	1.64333	3.59333	1.37879	1.39945e-33	1.91949e-32	up	4656
Cluster-15985.0	0.426667	26.9	6.23244	1.45017e-33	1.98841e-32	up	634
Cluster-38147.1	16.15	6.43333	-1.0795	1.6268e-33	2.22913e-32	down	1949
Cluster-7588.0	52.0333	18.52	-1.23124	1.78999e-33	2.45034e-32	down	820
Cluster-33656.2	11.56	0.0433333	-7.90328	1.99585e-33	2.72946e-32	down	2143
Cluster-31636.2	8.48333	1.88333	-1.92791	2.01323e-33	2.75234e-32	down	2031
Cluster-25699.0	20.7333	5.85667	-1.57402	2.26298e-33	3.09074e-32	down	2218
Cluster-34972.5	7.48667	13.1633	1.06512	2.43264e-33	3.31922e-32	up	4757
Cluster-26069.0	24.5667	6.37	-1.69822	2.53419e-33	3.45666e-32	down	1735
[truncated: 10,059 more rows]
