# Supplementary material for: Integrated Metabolome and Transcriptome Analyses Reveal That the Flavonoid Metabolic Pathway Is Associated with Pigment Differential Accumulation in Two Colors of Petaloid Staminodes in Canna glauca
Source: MDPI journal article supplement (doi:10.3390/horticulturae10040372), 2024-04-07
Supplement: s1 [file s1 › Supplementary Table S2.xlsx]

## Sheet: Sheet1
Supplementary Table S2 The flavonoid metabolites detected in the petaloid staminodes of Canna glauca
Number	Compounds	Class I	Class II	Q1 (Da)	Q3 (Da)	Molecular weight (Da)	Formula	Adduct Ionization model	CgpsY_Peak Area	CgpsP _Peak Area
1	2''-O-(3'',4''-Dimethoxybenzoyl)vitexin	Flavonoids	Flavones	597.165	477.12	596.153	C30H28O13	[M+H]+	73386.1	34131.9
2	2',8''-Biapigenin 4'''-O-glucoside*	Flavonoids	Biflavones	701.149	539.098	700.143	C36H28O15	[M+H]+	291367	616751
3	2',8''-Biapigenin*	Flavonoids	Biflavones	537.082	375.049	538.09	C30H18O10	[M-H]-	98829.6	28993.1
4	2,3-Dihydroamentoflavone	Flavonoids	Biflavones	539.097	413.064	540.106	C30H20O10	[M-H]-	35020.2	9791.27
5	3',4',5',5,7-Pentamethoxyflavone	Flavonoids	Flavones	373.13	343.083	372.121	C20H20O7	[M+H]+	7969.18	11491.3
6	3',4,4',5,7-Pentahydroxyflavan (Luteoforol)	Flavonoids	Flavanols	291.086	139.04	290.079	C15H14O6	[M+H]+	8636.42	88162.7
7	3',5',5,7-Tetrahydroxy-4'-methoxyflavanone-3'-O-glucoside	Flavonoids	Flavones	481.13	319.05	480.127	C22H24O12	[M+H]+	1.57057e+07	1.62113e+06
8	3',5,5',7-Tetrahydroxyflavanone-7-O-(6''-galloyl)glucoside	Flavonoids	Flavanones	603.134	289.071	602.127	C28H26O15	[M+H]+	36129.4	15032.6
9	3',5,5',7-Tetrahydroxyflavanone-7-O-glucoside*	Flavonoids	Flavanones	451.123	289.071	450.116	C21H22O11	[M+H]+	898006	879350
10	3',7-dihydroxy-4'-methoxyflavone	Flavonoids	Flavones	285.077	270.05	284.068	C16H12O5	[M+H]+	12229.1	88736.6
11	3',8''-Biapigenin*	Flavonoids	Biflavones	537.082	375.049	538.09	C30H18O10	[M-H]-	75605.5	18178.3
12	3'-O-Methyl-epicatechin	Flavonoids	Flavanols	305.102	139.037	304.095	C16H16O6	[M+H]+	795293	1.3432e+06
13	3'-O-Methylellagic acid 4-O-beta-D-glucoside	Tannins	Tannin	477.07	315.01	478.075	C21H18O13	[M-H]-	56826.5	56870.3
14	3'-O-Methyltricetin-5-O-glucoside*	Flavonoids	Flavones	479.12	317.06	478.111	C22H22O12	[M+H]+	403584	601459
15	3'-O-Methyltricetin-7-O-(6''-malonyl)glucoside*	Flavonoids	Flavones	565.119	317.066	564.111	C25H24O15	[M+H]+	398076	1.78597e+06
16	3'-O-Methyltricetin-7-O-glucoside	Flavonoids	Flavones	479.118	317.066	478.111	C22H22O12	[M+H]+	181507	725278
17	3'-O-methyl-ellagic acid-4-O-beta-D-xylopyranoside	Tannins	Tannin	447.058	315.015	448.064	C20H16O12	[M-H]-	98102.4	168131
18	3'-methoxyquercetin-3-O-L-rhamnosyl(1→2)-glucopyranoside*	Flavonoids	Flavonols	625.17	317.07	624.169	C28H32O16	[M+H]+	1.44101e+06	559875
19	3,3',4',5',7-Pentahydroxyflavone; Robinetin	Flavonoids	Flavonols	303.05	257.05	302.043	C15H10O7	[M+H]+	225513	1.74571e+06
20	3,3',4-O-Trimethylellagic acid	Tannins	Tannin	345.059	313.033	344.053	C17H12O8	[M+H]+	8031.42	304214
21	3,3'-O-Dimethylellagic Acid	Tannins	Tannin	329.03	298.983	330.038	C16H10O8	[M-H]-	11171.8	27753.4
22	3,3'-O-Dimethylellagic Acid-4'-O-arabinoside	Tannins	Tannin	463.087	331.046	462.08	C21H18O12	[M+H]+	20739.7	9367.06
23	3,4,2',4',6'-Pentahydroxychalcone	Flavonoids	Chalcones	287.058	135.046	288.063	C15H12O6	[M-H]-	24125.4	129418
24	3,4,2',4',6'-Pentahydroxychalcone-4'-O-glucoside	Flavonoids	Chalcones	449.11	287.06	450.116	C21H22O11	[M-H]-	74283.1	3.75902e+06
25	3,5,3',4',5'-penta-hydroxyflavan-7-gallate*	Flavonoids	Flavanols	459.093	139.039	458.085	C22H18O11	[M+H]+	34014.4	20470.4
26	3,5,4'-Trihydroxy-7-methoxyflavone (Rhamnocitrin)*	Flavonoids	Flavonols	301.071	286.047	300.063	C16H12O6	[M+H]+	396603	606989
27	3,5,6,7,8,4'-Hexamethoxyflavone	Flavonoids	Flavones	403.139	373.093	402.132	C21H22O8	[M+H]+	72227.6	73216.2
28	3,5,6,7-Tetramethoxyflavone*	Flavonoids	Flavones	343.118	313.072	342.11	C19H18O6	[M+H]+	15972	27915.7
29	3,5,7,3'4'-Pentamethoxyflavone	Flavonoids	Flavones	373.13	343.083	372.121	C20H20O7	[M+H]+	24800.7	30969.8
30	3,5,7,4'-Tetrahydroxy-8-methoxyflavone-3-O-glucoside-7-O-rhamnoside*	Flavonoids	Flavonols	625.18	317.07	624.169	C28H32O16	[M+H]+	1.92649e+06	576207
31	3,5,7-Trihydroxy-8,4'-dimethoxyflavone-7-O-glucoside*	Flavonoids	Flavonols	493.13	331.08	492.127	C23H24O12	[M+H]+	6.60434e+06	432909
32	3,5,7-Trihydroxyflavanone (Pinobanksin)*	Flavonoids	Flavanonols	271.061	151.003	272.068	C15H12O5	[M-H]-	88128.3	259208
33	3-Hydroxyphloretin	Flavonoids	Chalcones	291.086	123.044	290.079	C15H14O6	[M+H]+	2807.8	94892.7
34	3-Hydroxyphloretin-4'-O-glucoside	Flavonoids	Chalcones	451.12	167.03	452.132	C21H24O11	[M-H]-	641149	510172
35	3-Methylkaempferol	Flavonoids	Flavonols	301.071	258.052	300.063	C16H12O6	[M+H]+	28113	90010.3
36	3-O-Methylellagic acid	Tannins	Tannin	315.015	299.992	316.022	C15H8O8	[M-H]-	38688.7	167141
37	3-O-Methylellagic acid 4'-rhamnoside	Tannins	Tannin	461.073	315.017	462.08	C21H18O12	[M-H]-	3322.75	18172.7
38	3-O-Methylellagic acid 4'-sulfate*	Tannins	Tannin	394.971	315.022	395.979	C15H8O11S	[M-H]-	234628	20815.9
39	3-O-Methylellagic acid 4-sulfate*	Tannins	Tannin	394.97	315.015	395.979	C15H8O11S	[M-H]-	236527	25446.7
40	3-O-Methylquercetin	Flavonoids	Flavonols	315.051	271.019	316.058	C16H12O7	[M-H]-	19181.7	60219.1
41	4',5,7-Trihydroxy-3',3,6-Trimethoxyflavone (Jaceidin)	Flavonoids	Flavones	361.092	328.062	360.084	C18H16O8	[M+H]+	10654.7	13225.1
42	4'-Hydroxy-3,5-dimethoxydihydrochalcone	Flavonoids	Chalcones	287.139	121.028	286.12	C17H18O4	[M+H]+	40364.8	494224
43	4'-Hydroxy-5,7-dimethoxyflavanone	Flavonoids	Flavanones	299.092	119.05	300.1	C17H16O5	[M-H]-	13759.4	15622.8
44	5,2',5'-Trihydroxy-3,7,4'-trimethoxyflavone-2'-O-β-D-glucoside	Flavonoids	Flavones	523.144	361.096	522.137	C24H26O13	[M+H]+	527514	43479.5
45	5,3'-dihydroxy-6,7,4'-trimethoxyflavone-8-O-β-D-glucoside*	Flavonoids	Flavones	493.13	331.08	492.127	C23H24O12	[M+H]+	7.54394e+06	525209
46	5,4'-Dihydroxy-3,7-dimethoxyflavone(Kumatakenin)	Flavonoids	Flavonols	313.072	283.025	314.079	C17H14O6	[M-H]-	12312.8	33279.2
47	5,4'-Dihydroxy-7-methoxyflavanone (Sakuranetin)*	Flavonoids	Flavanones	287.091	167.035	286.084	C16H14O5	[M+H]+	12732.1	0
48	5,6,3',4'-Tetrahydroxy-3,7-dimethoxyflavone	Flavonoids	Flavones	347.074	315.057	346.069	C17H14O8	[M+H]+	69125.8	32248.1
49	5,6,7,4'-Tetramethoxyflavone*	Flavonoids	Flavones	343.118	313.071	342.11	C19H18O6	[M+H]+	15626.3	21508
50	5,7,2'-Trihydroxy-8-methoxyflavone*	Flavonoids	Flavones	299.058	284.039	300.063	C16H12O6	[M-H]-	909895	797878
51	5,7,2'-Trihydroxy-8-methoxyflavone; Scutevulin*	Flavonoids	Flavones	301.07	286.05	300.063	C16H12O6	[M+H]+	374879	596538
52	5,7,3',4',5'-Pentahydroxydihydroflavone	Flavonoids	Flavanones	303.052	151.03	304.058	C15H12O7	[M-H]-	6903.54	14235.3
53	5,7,3',4',5'-entahydroxyflavan-7-gallate	Flavonoids	Other Flavonoids	443.099	139.039	442.09	C22H18O10	[M+H]+	7575.58	0
54	5,7,3',5'-tetrahydroxy-6-methylfavanone*	Flavonoids	Flavones	301.071	286.049	300.063	C16H12O6	[M+H]+	410991	628879
55	5,7,4'-Trihydroxy-6-methylflavonoid	Flavonoids	Flavonols	303.088	183.03	302.079	C16H14O6	[M+H]+	7.60964e+06	1.25932e+07
56	5,7,4'-Trihydroxy-8-methylflavonoid	Flavonoids	Flavonols	303.088	167.03	302.079	C16H14O6	[M+H]+	209974	808096
57	5,7-Dihydroxy-3',4',5'-trimethoxyflavone	Flavonoids	Flavones	345.097	284.071	344.09	C18H16O7	[M+H]+	22478	34108.8
58	5-Demethoxynobiletin; 3',4',6,7,8-Pentamethoxyflavone*	Flavonoids	Flavones	373.13	312.1	372.121	C20H20O7	[M+H]+	24108.3	31352.3
59	5-Demethylnobiletin; 5-Hydroxy-6,7,8,3',4'-Pentamethoxyflavone*	Flavonoids	Flavones	389.123	359.085	388.116	C20H20O8	[M+H]+	7052.28	7170.16
60	5-Hydroxy-3',4',7-trimethoxyflavone glucoside	Flavonoids	Flavones	491.16	329.1	490.147	C24H26O11	[M+H]+	588237	49808.2
61	5-Hydroxy-3,3',4',5',7-Pentamethoxyflavone*	Flavonoids	Flavones	389.123	359.084	388.116	C20H20O8	[M+H]+	6247.27	5667.77
62	5-Hydroxy-3,7,8,3',4'-Pentamethoxyflavone*	Flavonoids	Flavones	389.123	359.078	388.116	C20H20O8	[M+H]+	7389.34	7874.37
63	5-Hydroxy-6,7,3',4'-tetramethoxyflavone	Flavonoids	Flavones	359.113	344.089	358.105	C19H18O7	[M+H]+	13181.5	17764.1
64	5-Hydroxy-7,4'-dimethoxy-6,8-dimethylflavone; Eucalyptin	Flavonoids	Flavones	325.108	293.082	326.115	C19H18O5	[M-H]-	5802.65	5803.3
65	5-hydroxy-6,7,3',4',5'-pentamethoxyflavone glucoside	Flavonoids	Flavones	551.18	389.13	550.169	C26H30O13	[M+H]+	180338	552942
66	6,7,8-Tetrahydroxy-5-methoxyflavone*	Flavonoids	Flavones	301.072	286.054	300.063	C16H12O6	[M+H]+	415037	618679
67	6-C-MethylKaempferol-3-glucoside*	Flavonoids	Flavones	463.12	301.08	462.116	C22H22O11	[M+H]+	3.89001e+06	1.03938e+07
68	6-C-Methylquercetin-3-O-rhamnoside	Flavonoids	Flavonols	463.12	317.06	462.116	C22H22O11	[M+H]+	238440	64422.6
69	6-Hydroxy-2'-methoxyflavone	Flavonoids	Flavones	267.067	252.044	268.074	C16H12O4	[M-H]-	12833.8	10695.5
70	6-Hydroxy-4'-O-Methylamentoflavone	Flavonoids	Biflavones	567.09	405.06	568.101	C31H20O11	[M-H]-	118309	26356.1
71	6-Hydroxykaempferol-3,6-O-Diglucoside	Flavonoids	Flavonols	627.16	303.05	626.148	C27H30O17	[M+H]+	1.05089e+06	1.48544e+06
72	6-Hydroxykaempferol-3-O-Rutinoside-6-O-glucoside*	Flavonoids	Flavonols	773.21	303.05	772.206	C33H40O21	[M+H]+	148598	207115
73	6-Hydroxykaempferol-6,7-O-Diglucoside	Flavonoids	Flavonols	627.16	303.05	626.148	C27H30O17	[M+H]+	1.44122e+06	2.44024e+06
74	6-Hydroxykaempferol-7-O-glucoside	Flavonoids	Flavonols	465.1	303.05	464.096	C21H20O12	[M+H]+	1.1757e+07	2.75929e+07
75	7,3',4'-Trihydroxyquercetin glucoside	Flavonoids	Flavones	507.15	345.1	506.142	C24H26O12	[M+H]+	759101	1.84836e+06
76	7,4'-Dihydroxyflavone	Flavonoids	Flavones	253.051	117.036	254.058	C15H10O4	[M-H]-	81765.8	86741.8
77	7,8,3',4'-tetrahydroxyflavanonol	Flavonoids	Flavonols	305.065	149.022	304.058	C15H12O7	[M+H]+	9666.27	269945
78	7,8-Dihydroxy-5,6,4'-trimethoxyflavone*	Flavonoids	Flavones	345.098	330.075	344.09	C18H16O7	[M+H]+	16662.9	28657.9
79	7-MethoxyAmentoflavanone	Flavonoids	Biflavones	555.126	409.091	556.137	C31H24O10	[M-H]-	21729	3291.35
80	7-O-Methylnaringenin*	Flavonoids	Flavanones	287.092	167.034	286.084	C16H14O5	[M+H]+	13820.8	3851.7
81	8-Methoxyapigenin*	Flavonoids	Flavones	301.071	286.047	300.063	C16H12O6	[M+H]+	394368	584218
82	8-Prenyl-7,4'-dihydroxy-5-methoxydihydroflavonol	Flavonoids	Flavonols	369.13	161.02	370.142	C21H22O6	[M-H]-	3.20543e+06	33671.1
83	Acacetin-7-O-(6''-O-acetyl)glucoside	Flavonoids	Flavones	487.125	163	488.132	C24H24O11	[M-H]-	57039.1	42833.2
84	Acacetin-7-O-rutinoside (Linarin)*	Flavonoids	Flavones	593.187	285.077	592.179	C28H32O14	[M+H]+	10311.2	28485.5
85	Aesculitannin A	Tannins	Tannin	863.186	575.119	864.19	C45H36O18	[M-H]-	1564.11	26387.6
86	Amentoflavone*	Flavonoids	Biflavones	537.083	375.05	538.09	C30H18O10	[M-H]-	98829.6	28993.1
87	Amentoflavone-7''-O-glucoside*	Flavonoids	Biflavones	701.149	539.09	700.143	C36H28O15	[M+H]+	314534	348844
88	Apiferol	Flavonoids	Flavones	275.091	139.04	274.084	C15H14O5	[M+H]+	2218.11	29141.1
89	Apigenin-4'-O-glucoside*	Flavonoids	Flavones	433.113	271.074	432.106	C21H20O10	[M+H]+	73359.2	475604
90	Apigenin-5-O-glucoside	Flavonoids	Flavones	433.113	271.06	432.106	C21H20O10	[M+H]+	465403	230697
91	Apigenin-6,8-di-C-arabinoside	Flavonoids	Flavones	535.145	499.123	534.137	C25H26O13	[M+H]+	14272.8	49095.3
92	Apigenin-6,8-di-C-glucoside (Vicenin-2)	Flavonoids	Flavones	595.166	457.134	594.159	C27H30O15	[M+H]+	38841.5	44245.6
93	Apigenin-6-C-(2''-glucosyl)arabinoside	Flavonoids	Flavones	565.155	427.101	564.148	C26H28O14	[M+H]+	136096	134296
94	Apigenin-6-C-(2''-xylosyl)glucoside*	Flavonoids	Flavones	565.155	433.11	564.148	C26H28O14	[M+H]+	15485	11611.1
95	Apigenin-6-C-glucoside (Isovitexin)*	Flavonoids	Flavones	433.113	313.072	432.106	C21H20O10	[M+H]+	114985	172320
96	Apigenin-6-C-xyloside-8-C-arabinoside	Flavonoids	Flavones	535.145	517.134	534.137	C25H26O13	[M+H]+	286791	70479.4
97	Apigenin-7-O-(2''-glucurosyl)glucuronide	Flavonoids	Flavones	623.124	271.06	622.117	C27H26O17	[M+H]+	44550.2	39959
98	Apigenin-7-O-(6''-malonyl)glucoside	Flavonoids	Flavones	519.113	271.06	518.106	C24H22O13	[M+H]+	13482.4	58134.4
99	Apigenin-7-O-(6''-p-Coumaryl)glucoside	Flavonoids	Flavones	579.15	271.061	578.142	C30H26O12	[M+H]+	39502.6	86561.4
100	Apigenin-7-O-Gentiobioside	Flavonoids	Flavones	595.166	271.062	594.159	C27H30O15	[M+H]+	13596	11832
101	Apigenin-7-O-glucoside(Cosmosiin)*	Flavonoids	Flavones	433.113	271.066	432.106	C21H20O10	[M+H]+	93337.6	489441
102	Apigenin-7-O-glucuronide	Flavonoids	Flavones	447.09	271.061	446.085	C21H18O11	[M+H]+	15425.3	33110.7
103	Apigenin-7-O-neohesperidoside (Rhoifolin)	Flavonoids	Flavones	579.169	271.07	578.164	C27H30O14	[M+H]+	67150.3	83860.4
104	Apigenin-8-C-(2''-glucosyl)arabinoside	Flavonoids	Flavones	565.155	457.111	564.148	C26H28O14	[M+H]+	58925.6	40584.9
105	Apigenin-8-C-(2''-xylosyl)glucoside*	Flavonoids	Flavones	565.155	433.11	564.148	C26H28O14	[M+H]+	15485	11611.1
106	Apigenin-8-C-Arabinoside	Flavonoids	Flavones	403.102	367.08	402.095	C20H18O9	[M+H]+	23614.5	21075.6
107	Apigenin-8-C-Glucoside (Vitexin)*	Flavonoids	Flavones	433.113	313.072	432.106	C21H20O10	[M+H]+	114985	172320
108	Aromadendrin-7-O-glucoside	Flavonoids	Flavanonols	449.11	287.06	450.116	C21H22O11	[M-H]-	314184	498823
109	Avicularin(Quercetin-3-O-α-L-arabinofuranoside)*	Flavonoids	Flavonols	435.09	303.05	434.085	C20H18O11	[M+H]+	8.80856e+06	2.56049e+07
110	Baicalein	Flavonoids	Flavones	271.06	123.007	270.053	C15H10O5	[M+H]+	120144	0
111	Biondnoid I*	Flavonoids	Flavonols	595.14	287.05	594.137	C30H26O13	[M+H]+	61890.3	4.65104e+06
112	Butin; 7,3',4'-Trihydroxyflavanone*	Flavonoids	Flavanones	273.076	153.018	272.068	C15H12O5	[M+H]+	48416.4	165933
113	Catechin gallate*	Flavonoids	Flavanols	441.083	169.015	442.09	C22H18O10	[M-H]-	659754	543710
114	Catechin*	Flavonoids	Flavanols	291.09	139.04	290.079	C15H14O6	[M+H]+	5465.63	1.4175e+06
115	Catechin-(7,8-bc)-4α-(3,4-dihydroxyphenyl)-dihydro-2-(3H)-one	Flavonoids	Flavanols	451.103	341.06	452.111	C24H20O9	[M-H]-	0	160747
116	Chrysin-7-O-Glucuronide	Flavonoids	Flavones	431.099	255.07	430.09	C21H18O10	[M+H]+	15913.7	11896.8
117	Chrysoeriol-5-O-glucoside	Flavonoids	Flavones	461.109	299.056	462.116	C22H22O11	[M-H]-	8.61822e+06	4.91518e+07
118	Chrysoeriol-6-C-glucoside-4'-O-glucoside*	Flavonoids	Flavones	625.176	463.13	624.169	C28H32O16	[M+H]+	583345	113687
119	Chrysoeriol-7-O-(2''-O-glucuronyl)glucuronide	Flavonoids	Flavones	653.135	301.071	652.128	C28H28O18	[M+H]+	17830.2	15383.8
120	Chrysoeriol-7-O-(6''-malonyl)glucoside	Flavonoids	Flavones	549.124	301.071	548.117	C25H24O14	[M+H]+	217709	286730
121	Chrysoeriol-7-O-rutinoside	Flavonoids	Flavones	607.167	299.056	608.174	C28H32O15	[M-H]-	2.66985e+07	3.10259e+07
122	Chrysoeriol-8-C-glucoside (Scoparin)*	Flavonoids	Flavones	463.11	343.08	462.116	C22H22O11	[M+H]+	373272	1.98144e+06
123	Chrysoeriol; 5,7,4'-Trihydroxy-3'-Methoxyflavone	Flavonoids	Flavones	301.071	286.08	300.063	C16H12O6	[M+H]+	33713.9	62650
124	Cirsilineol (4',5-Dihydroxy-3',6,7-trimethoxyflavone)	Flavonoids	Flavanones	343.082	313.035	344.09	C18H16O7	[M-H]-	43567.4	48916.5
125	Cirsiliol (3',4',5-Trihydroxy-6,7-Dimethoxyflavone)	Flavonoids	Flavanones	331.081	298.047	330.074	C17H14O7	[M+H]+	12391	15910.8
126	Cirsimaritin (4',5-dihydroxy-6,7-dimethoxyflavone)	Flavonoids	Flavones	315.086	282.059	314.079	C17H14O6	[M+H]+	6723.71	12129.1
127	Corilagin*	Tannins	Tannin	633.074	301.001	634.081	C27H22O18	[M-H]-	5446.68	12790.5
128	Cupressuflavone*	Flavonoids	Biflavones	537.083	375.054	538.09	C30H18O10	[M-H]-	75605.5	18178.3
129	Cyanidin-3,5-O-diglucoside (Cyanin)	Flavonoids	Anthocyanidins	611.162	287.055	611.161	C27H31O16+	[M]+	32910.6	9.28024e+06
130	Cyanidin-3-O-(6''-O-acetyl)glucoside	Flavonoids	Anthocyanidins	491.118	287.055	491.118	C23H23O12+	[M]+	12208.7	3.24371e+06
131	Cyanidin-3-O-(6''-O-malonyl)glucoside	Flavonoids	Anthocyanidins	535.108	287.055	535.108	C24H23O14+	[M]+	13537.2	4.89057e+06
132	Cyanidin-3-O-arabinoside*	Flavonoids	Anthocyanidins	419.097	287.055	419.097	C20H19O10+	[M]+	37924.4	4.03494e+07
133	Cyanidin-3-O-galactoside*	Flavonoids	Anthocyanidins	449.108	287.055	449.108	C21H21O11+	[M]+	127428	5.45372e+07
134	Cyanidin-3-O-gentiobioside	Flavonoids	Anthocyanidins	611.163	287.055	611.161	C27H31O16+	[M]+	19914.5	1.07268e+07
135	Cyanidin-3-O-glucoside (Kuromanin)*	Flavonoids	Anthocyanidins	449.108	287.055	449.108	C21H21O11+	[M]+	122599	5.54007e+07
136	Cyanidin-3-O-rutinoside (Keracyanin)	Flavonoids	Anthocyanidins	595.16	287.06	595.166	C27H31O15+	[M]+	208846	8.8095e+07
137	Cyanidin-3-O-sambubioside[Cyanidin-3-O-(2''-O-xylosyl)glucoside]	Flavonoids	Anthocyanidins	581.15	287.054	581.15	C26H29O15+	[M]+	41607.3	1.05521e+07
138	Cyanidin-3-O-xyloside*	Flavonoids	Anthocyanidins	419.1	287.06	419.097	C20H19O10+	[M]+	37924.4	4.03494e+07
139	Didymin (Isosakuranetin-7-O-rutinoside)*	Flavonoids	Flavanones	593.19	285.08	594.195	C28H34O14	[M-H]-	2.75416e+06	1.56063e+07
140	Dihydrocharcone-4'-O-glucoside*	Flavonoids	Chalcones	435.13	273.08	436.137	C21H24O10	[M-H]-	210857	2.42445e+06
141	Dihydrokaempferide	Flavonoids	Flavanonols	303.09	229.08	302.079	C16H14O6	[M+H]+	165441	813351
142	Dihydrokaempferol-3-O-glucoside*	Flavonoids	Flavanonols	451.123	289.083	450.116	C21H22O11	[M+H]+	421989	1.07183e+06
143	Dihydrokaempferol-7-O-glucoside*	Flavonoids	Flavanonols	449.109	287.056	450.116	C21H22O11	[M-H]-	951296	1.7403e+06
144	Dihydromyricetin-3-O-glucoside	Flavonoids	Flavanonols	481.135	319.084	482.106	C21H22O13	[M-H]-	419509	137658
145	Diosmetin (5,7,3'-Trihydroxy-4'-methoxyflavone)*	Flavonoids	Flavones	299.056	284.033	300.063	C16H12O6	[M-H]-	930233	851958
146	Diosmetin-6-C-glucoside	Flavonoids	Flavones	463.123	427.1	462.116	C22H22O11	[M+H]+	21346	26363.4
147	Diosmetin-7-O-Neohesperidoside (Neodiosmin)*	Flavonoids	Flavones	609.181	301.073	608.174	C28H32O15	[M+H]+	27133.3	60102.3
148	Diosmetin-7-O-galactoside*	Flavonoids	Flavones	463.123	301.07	462.116	C22H22O11	[M+H]+	3.7918e+06	1.08694e+07
149	Diosmetin-7-O-glucoside*	Flavonoids	Flavones	463.12	301.07	462.116	C22H22O11	[M+H]+	3.97287e+06	1.08728e+07
150	Diosmetin-7-O-rutinoside (Diosmin)*	Flavonoids	Flavones	609.181	301.079	608.174	C28H32O15	[M+H]+	149578	325384
151	Diosmetin-8-C-(2''-O-rhamnosyl)glucoside	Flavonoids	Flavones	609.181	445.114	608.174	C28H32O15	[M+H]+	11791.6	17123.6
152	Ellagic acid	Tannins	Tannin	300.999	185.023	302.006	C14H6O8	[M-H]-	40025.2	61258.9
153	Ellagic acid-4-O-Xyloside	Tannins	Tannin	433.041	301	434.048	C19H14O12	[M-H]-	17261.9	20535.1
154	Ellagic acid-4-O-glucoside	Tannins	Tannin	463.052	300.99	464.059	C20H16O13	[M-H]-	1.25929e+06	2.14736e+06
155	Epiafzelechin	Flavonoids	Flavanols	275.091	107.049	274.084	C15H14O5	[M+H]+	11108.6	13968.6
156	Epicatechin gallate*	Flavonoids	Flavanols	441.083	169.016	442.09	C22H18O10	[M-H]-	678319	553436
157	Epicatechin*	Flavonoids	Flavanols	291.09	139.04	290.079	C15H14O6	[M+H]+	9225.46	130631
158	Epicatechin-3'-O-β-D-glucopyranoside*	Flavonoids	Flavanols	451.13	289.07	452.132	C21H24O11	[M-H]-	56767.9	3.88367e+06
159	Epigallocatechin	Flavonoids	Flavanols	307.081	139.039	306.074	C15H14O7	[M+H]+	10382.6	947598
160	Epigallocatechin 3,5-Digallate	Flavonoids	Flavanols	611.105	153.018	610.096	C29H22O15	[M+H]+	18128.8	22694.3
161	Epigallocatechin-3-O-gallate*	Flavonoids	Flavanols	457.078	169.014	458.085	C22H18O11	[M-H]-	423195	425271
162	Eriodictyol (5,7,3',4'-Tetrahydroxyflavanone)	Flavonoids	Flavanones	287.056	135.045	288.063	C15H12O6	[M-H]-	22966.6	156326
163	Eriodictyol-3'-O-glucoside*	Flavonoids	Flavanones	449.11	287.057	450.116	C21H22O11	[M-H]-	332582	1.82703e+06
164	Eriodictyol-7-O-(6''-O-galloyl)glucoside	Flavonoids	Flavanones	601.12	439.092	602.127	C28H26O15	[M-H]-	353854	588761
165	Eriodictyol-7-O-(6''-O-p-coumaroyl)glucoside	Flavonoids	Flavanones	595.146	287.055	596.153	C30H28O13	[M-H]-	75167.6	392517
166	Eriodictyol-7-O-(6''-malonyl)glucoside	Flavonoids	Flavanones	537.124	289	536.117	C24H24O14	[M+H]+	182707	1.93343e+06
167	Eriodictyol-7-O-glucoside*	Flavonoids	Flavanones	451.12	289.07	450.116	C21H22O11	[M+H]+	821777	1.49607e+06
168	Eriodictyol-7-O-rutinoside-4'-O-Sophoroside	Flavonoids	Flavanones	919.259	757.2	920.28	C39H52O25	[M-H]-	145173	28660.8
169	Eriodictyol-8-C-glucoside-4'-O-glucoside	Flavonoids	Flavanones	613.176	451.1	612.169	C27H32O16	[M+H]+	1.16326e+06	393426
170	Eupatilin (5,7-Dihydroxy-3',4',6-Trimethoxyflavone)*	Flavonoids	Flavones	345.097	330.073	344.09	C18H16O7	[M+H]+	18093.7	23979.6
171	Eupatilin-7-O-glucoside	Flavonoids	Flavones	507.15	345.09	506.142	C24H26O12	[M+H]+	361802	124226
172	Eupatorin; 3',5-Dihydroxy-4',6,7-Trimethoxyflavone	Flavonoids	Flavones	345.097	312.063	344.09	C18H16O7	[M+H]+	14392.6	18671.9
173	Fisetin	Flavonoids	Flavonols	287.06	137.02	286.048	C15H10O6	[M+H]+	241254	2.06387e+06
174	Gallocatechin 3-O-gallate*	Flavonoids	Flavanols	457.078	169.013	458.085	C22H18O11	[M-H]-	467943	606936
175	Gallocatechin gallate*	Flavonoids	Flavanols	459.092	139.039	458.085	C22H18O11	[M+H]+	34014.4	20470.4
176	Gallocatechin-(4α→8)-Catechin-(4α→8)-Catechin	Flavonoids	Flavanols	883.207	595.144	882.201	C45H38O19	[M+H]+	2466.31	141700
177	Gallocatechin-(4α→8)-gallocatechin	Flavonoids	Flavanols	611.143	287.054	610.132	C30H26O14	[M+H]+	470912	809198
178	Gardenin A	Flavonoids	Flavones	419.133	404.11	418.126	C21H22O9	[M+H]+	5376.64	7437.99
179	Ginnalin A (2,6-Di-O-Galloyl-1,5-Anhydro-D-Glucitol)	Tannins	Tannin	467.083	169.014	468.09	C20H20O13	[M-H]-	2804.11	51919.6
180	Gossypetin-3-O-(6''-malonyl)glucoside*	Flavonoids	Flavonols	567.097	319.046	566.091	C24H22O16	[M+H]+	27006.3	6670
181	Gossypetin-3-O-glucoside*	Flavonoids	Flavonols	481.1	319.05	480.09	C21H20O13	[M+H]+	1.49852e+07	1.2641e+06
182	Gossypetin-3-O-glucoside-8-O-xyloside	Flavonoids	Flavonols	613.14	319.05	612.133	C26H28O17	[M+H]+	12548.8	11248.8
183	Gossypetin-8-O-glucoside	Flavonoids	Flavonols	481.1	319.05	480.09	C21H20O13	[M+H]+	5.76281e+06	186831
184	Herbacetin	Flavonoids	Flavonols	301.035	211.04	302.043	C15H10O7	[M-H]-	19442.7	107768
185	Herbacetin-3-O-glucuronide*	Flavonoids	Flavonols	479.082	303.051	478.075	C21H18O13	[M+H]+	38306.2	32954.2
186	Herbacetin-7-O-(3''-glucosyl)rhamnoside; Rhodiosin	Flavonoids	Flavonols	611.16	303.05	610.153	C27H30O16	[M+H]+	314797	736961
187	Herbacetin-7-O-rhamnoside-8-O-glucoside; Rhodionidin*	Flavonoids	Flavonols	611.16	303.05	610.153	C27H30O16	[M+H]+	148503	4.18319e+06
188	Hesperetin	Flavonoids	Flavanones	303.086	177.055	302.079	C16H14O6	[M+H]+	130588	2.24967e+06
189	Hesperetin-5-O-glucoside	Flavonoids	Flavanones	463.12	301.07	464.132	C22H24O11	[M-H]-	1.05342e+06	5.16018e+06
190	Hesperetin-7-O-(6''-malonyl)glucoside	Flavonoids	Flavanones	551.14	303.09	550.132	C25H26O14	[M+H]+	40266.9	260721
191	Hesperetin-7-O-glucoside*	Flavonoids	Flavanones	465.14	303.09	464.132	C22H24O11	[M+H]+	522540	2.76453e+06
192	Hesperetin-7-O-neohesperidoside(Neohesperidin)*	Flavonoids	Flavanones	611.2	303.09	610.19	C28H34O15	[M+H]+	612232	502261
193	Hesperetin-7-O-rutinoside (Hesperidin)*	Flavonoids	Flavanones	611.2	303.09	610.19	C28H34O15	[M+H]+	612232	502261
194	Hispidulin (5,7,4'-Trihydroxy-6-methoxyflavone)*	Flavonoids	Flavones	301.07	286.049	300.063	C16H12O6	[M+H]+	391288	590221
195	Hispidulin-7-O-glucoside(Homoplantaginin)*	Flavonoids	Flavones	463.125	301.07	462.116	C22H22O11	[M+H]+	4.34864e+06	1.15027e+07
196	Hispidulin-8-C-(2''-O-glucosyl)glucoside*	Flavonoids	Flavones	625.18	463.13	624.169	C28H32O16	[M+H]+	400358	95933
197	Hispidulin-8-C-glucoside*	Flavonoids	Flavones	463.13	343.09	462.116	C22H22O11	[M+H]+	358529	153999
198	Homoeriodictyol-7,4'-di-O-β-D-glucopyranoside	Flavonoids	Flavanones	627.191	303.087	626.185	C28H34O16	[M+H]+	200458	264117
199	Homoeriodictyol-7-O-β-O-glucoside*	Flavonoids	Flavanones	465.142	303.088	464.131	C22H24O11	[M+H]+	621082	3.17671e+06
200	Isocorilagin	Tannins	Tannin	633.073	301	634.081	C27H22O18	[M-H]-	155115	166245
201	Isoorientin-7-O-(6''-p-coumaroyl)glucoside	Flavonoids	Flavones	757.197	147.1	756.19	C36H36O18	[M+H]+	23924	16746.6
202	Isorhamnetin-3-O-(2''-O-xylosyl)glucoside	Flavonoids	Flavonols	611.16	317.06	610.153	C27H30O16	[M+H]+	14538	8338.33
203	Isorhamnetin-3-O-(6''-acetylglucoside)	Flavonoids	Flavonols	519.114	315.051	520.122	C24H24O13	[M-H]-	621092	1.56698e+06
204	Isorhamnetin-3-O-(6''-malonyl)glucoside*	Flavonoids	Flavonols	565.12	317.07	564.111	C25H24O15	[M+H]+	362927	1.89188e+06
205	Isorhamnetin-3-O-Glucoside*	Flavonoids	Flavonols	479.12	317.07	478.111	C22H22O12	[M+H]+	3.93987e+06	1.42818e+06
206	Isorhamnetin-3-O-arabinoside	Flavonoids	Flavonols	449.106	317.06	448.101	C21H20O11	[M+H]+	110068	249456
207	Isorhamnetin-3-O-arabinoside-7-O-rhamnoside	Flavonoids	Flavonols	595.166	317.067	594.159	C27H30O15	[M+H]+	4794.13	4172.5
208	Isorhamnetin-3-O-galactoide-7-O-rhamnoside*	Flavonoids	Flavonols	625.176	317.067	624.169	C28H32O16	[M+H]+	35978.9	1.21348e+06
209	Isorhamnetin-3-O-glucoside-7-O-rhamnoside*	Flavonoids	Flavonols	625.18	317.07	624.169	C28H32O16	[M+H]+	35978.9	1.21348e+06
210	Isorhamnetin-3-O-neohesperidoside*	Flavonoids	Flavonols	625.17	317.07	624.169	C28H32O16	[M+H]+	1.52053e+06	435947
211	Isorhamnetin-3-O-rhamnoside	Flavonoids	Flavonols	463.12	317.06	462.116	C22H22O11	[M+H]+	218821	59306.9
212	Isorhamnetin-3-O-rutinoside (Narcissin)*	Flavonoids	Flavonols	625.176	317.075	624.169	C28H32O16	[M+H]+	1.75427e+06	1.29554e+06
213	Isorhamnetin-3-O-rutinoside-7-O-arabinoside	Flavonoids	Flavonols	757.218	317.06	756.211	C33H40O20	[M+H]+	5865.34	3337.5
214	Isorhamnetin-3-O-sophoroside	Flavonoids	Flavonols	641.171	317.066	640.164	C28H32O17	[M+H]+	64129.3	51149.9
215	Isorhamnetin-7-O-glucoside (Brassicin)*	Flavonoids	Flavonols	479.12	317.06	478.111	C22H22O12	[M+H]+	1.48755e+06	6.59719e+06
216	Isorhamnetin; 3'-Methoxy-3,4',5,7-Tetrahydroxyflavone	Flavonoids	Flavonols	315.051	151.004	316.058	C16H12O7	[M-H]-	21352.7	389598
217	Isosaponarin(Isovitexin-4'-O-glucoside)	Flavonoids	Flavones	595.166	313.07	594.159	C27H30O15	[M+H]+	32329.7	31409.1
218	Isoschaftoside	Flavonoids	Flavones	565.155	409.092	564.148	C26H28O14	[M+H]+	95613.9	84247.7
219	Isoscutellarein	Flavonoids	Flavones	287.06	153.01	286.048	C15H10O6	[M+H]+	105105	1.05082e+06
220	Isotamarixin*	Flavonoids	Flavonols	479.118	317.062	478.111	C22H22O12	[M+H]+	570617	551138
221	Isovitexin-2''-O-(6'''-feruloyl)glucoside	Flavonoids	Flavones	771.213	147.045	770.206	C37H38O18	[M+H]+	13584.1	5475.31
222	Isovitexin-2''-O-(6'''-p-coumaroyl)glucoside	Flavonoids	Flavones	741.2	433.111	740.195	C36H36O17	[M+H]+	52238.3	228770
223	Isovitexin-2''-O-xyloside*	Flavonoids	Flavones	565.15	433.11	564.148	C26H28O14	[M+H]+	8531.64	11143.3
224	Isovitexin-7-O-(6''-feruloyl)glucoside	Flavonoids	Flavones	771.213	463.1	770.206	C37H38O18	[M+H]+	120909	132885
225	Isovitexin-7-O-(6''-sinapoyl)glucoside	Flavonoids	Flavones	801.224	639.1	800.216	C38H40O19	[M+H]+	337966	84733.6
226	Isovitexin-7-O-glucoside(Saponarin)	Flavonoids	Flavones	595.164	313.07	594.159	C27H30O15	[M+H]+	0	45723.6
227	Kaempferide-3-O-glucuronide	Flavonoids	Flavonols	475.088	300	476.096	C22H20O12	[M-H]-	71669.9	56603.2
228	Kaempferol-3,7-O-diglucoside	Flavonoids	Flavonols	611.161	287.054	610.153	C27H30O16	[M+H]+	504024	866112
229	Kaempferol-3-O-(2''-O-acetyl)glucoside	Flavonoids	Flavonols	491.12	287.05	490.111	C23H22O12	[M+H]+	611882	6.99768e+06
230	Kaempferol-3-O-(2''-galloyl)galactoside*	Flavonoids	Flavonols	601.119	287.055	600.111	C28H24O15	[M+H]+	5003.33	8893.33
231	Kaempferol-3-O-(2''-p-Coumaroyl)galactoside*	Flavonoids	Flavonols	595.145	287.055	594.137	C30H26O13	[M+H]+	61890.3	4.65104e+06
232	Kaempferol-3-O-(6''-O-acetyl)glucoside	Flavonoids	Flavonols	489.11	285.04	490.111	C23H22O12	[M-H]-	5.34633e+06	2.71976e+07
233	Kaempferol-3-O-(6''-Rhamnosyl-2''-Glucosyl)Glucoside (Camelliaside A)	Flavonoids	Flavonols	757.216	287.055	756.211	C33H40O20	[M+H]+	11554.3	97978.1
234	Kaempferol-3-O-(6''-galloyl)glucoside*	Flavonoids	Flavonols	601.119	287.056	600.111	C28H24O15	[M+H]+	5003.33	8893.33
235	Kaempferol-3-O-(6''-malonyl)galactoside*	Flavonoids	Flavonols	535.11	287.05	534.101	C24H22O14	[M+H]+	6.91993e+06	6.77256e+07
236	Kaempferol-3-O-(6''-malonyl)glucoside*	Flavonoids	Flavonols	535.11	287.05	534.101	C24H22O14	[M+H]+	6.85822e+06	5.8434e+07
237	Kaempferol-3-O-(6''-p-Coumaroyl)galactoside*	Flavonoids	Flavonols	595.14	287.06	594.137	C30H26O13	[M+H]+	258931	2.184e+06
238	Kaempferol-3-O-(6''-p-Coumaroyl)glucoside (Tiliroside)*	Flavonoids	Flavonols	595.145	287.057	594.137	C30H26O13	[M+H]+	258931	2.184e+06
239	Kaempferol-3-O-arabinoside (Juglanin)	Flavonoids	Flavonols	419.1	287.06	418.09	C20H18O10	[M+H]+	915944	7.49151e+06
240	Kaempferol-3-O-galactoside (Trifolin)*	Flavonoids	Flavonols	447.09	285.04	448.101	C21H20O11	[M-H]-	101675	550555
241	Kaempferol-3-O-galactoside-4'-O-glucoside	Flavonoids	Flavonols	611.159	287.056	610.153	C27H30O16	[M+H]+	8208.7	65101.8
242	Kaempferol-3-O-glucorhamnoside*	Flavonoids	Flavonols	595.17	287.06	594.159	C27H30O15	[M+H]+	1.48304e+07	6.23051e+07
243	Kaempferol-3-O-glucoside (Astragalin)*	Flavonoids	Flavonols	449.108	287.055	448.101	C21H20O11	[M+H]+	1.20484e+06	1.31842e+07
244	Kaempferol-3-O-glucoside-7-O-rhamnoside*	Flavonoids	Flavonols	595.17	287.06	594.159	C27H30O15	[M+H]+	1.37405e+07	6.35758e+07
245	Kaempferol-3-O-glucuronide	Flavonoids	Flavonols	461.074	285.041	462.08	C21H18O12	[M-H]-	60778.6	340607
246	Kaempferol-3-O-neohesperidoside*	Flavonoids	Flavonols	595.16	287.06	594.159	C27H30O15	[M+H]+	1.48379e+07	5.96959e+07
247	Kaempferol-3-O-neohesperidoside-7-O-glucoside*	Flavonoids	Flavonols	757.219	287.055	756.211	C33H40O20	[M+H]+	5310.74	1.30447e+06
248	Kaempferol-3-O-rhamnoside (Afzelin)(Kaempferin)	Flavonoids	Flavonols	431.098	285.039	432.106	C21H20O10	[M-H]-	72864.1	393957
249	Kaempferol-3-O-rutinoside(Nicotiflorin)*	Flavonoids	Flavonols	595.17	287.05	594.159	C27H30O15	[M+H]+	1.58736e+07	5.66794e+07
250	Kaempferol-3-O-rutinoside-7-O-glucoside	Flavonoids	Flavonols	757.219	287.055	756.211	C33H40O20	[M+H]+	19562	41915.5
251	Kaempferol-3-O-sambubioside	Flavonoids	Flavonols	581.148	287.059	580.143	C26H28O15	[M+H]+	19167.7	85283.2
252	Kaempferol-3-O-sophoroside-7-O-rhamnoside*	Flavonoids	Flavonols	757.22	287.06	756.211	C33H40O20	[M+H]+	5310.74	1.30447e+06
253	Kaempferol-3-O-sulfonate	Flavonoids	Flavonols	364.997	285.04	366.005	C15H10O9S	[M-H]-	165392	63892.6
254	Kaempferol-3-O-xylosyl(1→2)glucoside	Flavonoids	Flavonols	581.15	287.05	580.143	C26H28O15	[M+H]+	7271.21	40004.2
255	Kaempferol-4'-O-glucoside*	Flavonoids	Flavonols	449.11	287.06	448.101	C21H20O11	[M+H]+	2.55595e+06	4.12801e+06
256	Kaempferol-7-O-glucoside*	Flavonoids	Flavonols	447.093	285.041	448.101	C21H20O11	[M-H]-	3.47396e+06	1.98774e+07
257	Kaempferol-7-O-rhamnoside	Flavonoids	Flavonols	431.098	285.038	432.106	C21H20O10	[M-H]-	76579.1	434657
258	Kayaflavone*	Flavonoids	Biflavones	581.14	581.14	580.137	C33H24O10	[M+H]+	596918	1.28287e+06
259	Laricitrin-3-O-glucoside*	Flavonoids	Flavonols	495.11	333.07	494.106	C22H22O13	[M+H]+	451089	187431
260	Leucocyanidin	Flavonoids	Flavones	305.07	125.02	306.074	C15H14O7	[M-H]-	18036.8	47877.9
261	Leucocyanidin; 3,4,5,7,3',4'-Hexahydroxyflavan	Flavonoids	Flavanols	307.081	137.023	306.074	C15H14O7	[M+H]+	9386.36	725081
262	Limocitrin-3,7-di-O-glucoside*	Flavonoids	Flavonols	671.182	347.07	670.174	C29H34O18	[M+H]+	9464.54	6505.38
263	Limocitrin-3-O-(3-hydroxy-3-methylglutarate)glucoside	Flavonoids	Flavonols	653.171	347.1	652.164	C29H32O17	[M+H]+	7272.82	11604.5
264	Limocitrin-3-O-galactoside*	Flavonoids	Flavonols	509.128	347.07	508.122	C23H24O13	[M+H]+	198022	337457
265	Limocitrin-3-O-glucoside*	Flavonoids	Flavonols	509.129	347.07	508.122	C23H24O13	[M+H]+	293214	96512.9
266	Limocitrin-3-O-sophoroside*	Flavonoids	Flavonols	671.18	347.07	670.174	C29H34O18	[M+H]+	9464.54	6505.38
267	Limocitrin-7-O-glucoside	Flavonoids	Flavonols	509.128	347.07	508.122	C23H24O13	[M+H]+	4.13751e+06	422693
268	Luteolin (5,7,3',4'-Tetrahydroxyflavone)	Flavonoids	Flavones	285.04	151	286.048	C15H10O6	[M-H]-	50012.7	586059
269	Luteolin-3'-O-glucoside	Flavonoids	Flavones	449.108	287.061	448.101	C21H20O11	[M+H]+	1.73552e+06	1.17182e+07
270	Luteolin-4'-O-glucoside*	Flavonoids	Flavones	449.11	287.05	448.101	C21H20O11	[M+H]+	1.31062e+06	1.38191e+07
271	Luteolin-6,8-di-C-glucoside	Flavonoids	Flavones	611.16	593.14	610.153	C27H30O16	[M+H]+	298923	57676.9
272	Luteolin-6-C-arabinoside-7-O-glucoside	Flavonoids	Flavones	581.15	383.07	580.143	C26H28O15	[M+H]+	77413.2	10377.4
273	Luteolin-6-C-glucoside (Isoorientin)*	Flavonoids	Flavones	449.108	299.056	448.101	C21H20O11	[M+H]+	74531.1	103945
274	Luteolin-7-O-(6''-malonyl)glucoside*	Flavonoids	Flavones	535.11	287.05	534.101	C24H22O14	[M+H]+	302451	3.00524e+06
275	Luteolin-7-O-(6''-malonyl)glucoside-5-O-rhamnoside	Flavonoids	Flavones	681.166	287.055	680.159	C30H32O18	[M+H]+	99288.7	316086
276	Luteolin-7-O-glucoside (Cynaroside)*	Flavonoids	Flavones	449.108	287.062	448.101	C21H20O11	[M+H]+	1.7858e+06	1.26601e+07
277	Luteolin-7-O-glucuronide*	Flavonoids	Flavones	463.087	287.061	462.08	C21H18O12	[M+H]+	111435	73565.8
278	Luteolin-7-O-glucuronide-(2→1)-glucuronide	Flavonoids	Flavones	639.119	287.05	638.112	C27H26O18	[M+H]+	3338.33	27361.2
279	Luteolin-7-O-rutinoside*	Flavonoids	Flavones	595.17	287.06	594.159	C27H30O15	[M+H]+	1.48304e+07	6.23051e+07
280	Luteolin-8-C-glucoside (Orientin)*	Flavonoids	Flavones	449.108	299.055	448.101	C21H20O11	[M+H]+	39367.3	65457.6
281	Malonyl isoSakuranin	Flavonoids	Flavanones	535.14	287.09	534.137	C25H26O13	[M+H]+	6.01064e+06	5.97794e+07
282	Malvidin-3-O-galactoside (Primulin)*	Flavonoids	Anthocyanidins	493.134	331.081	493.134	C23H25O12+	[M]+	2.22392e+06	316089
283	Malvidin-3-O-glucoside (Oenin)*	Flavonoids	Anthocyanidins	493.134	331.081	493.134	C23H25O12+	[M]+	2.22392e+06	316089
284	Methylhesperidin	Flavonoids	Flavanones	625.213	317.105	624.205	C29H36O15	[M+H]+	5861.57	22917.9
285	Morin	Flavonoids	Flavonols	301.035	151.004	302.043	C15H10O7	[M-H]-	507328	6.92948e+06
286	Morin-3-O-arabinoside	Flavonoids	Flavonols	433.08	300.03	434.085	C20H18O11	[M-H]-	607227	1.31148e+06
287	Morin-3-O-xyloside*	Flavonoids	Flavonols	435.09	303.05	434.085	C20H18O11	[M+H]+	1.10412e+07	2.81953e+07
288	Myricetin	Flavonoids	Flavonols	319.046	153.02	318.038	C15H10O8	[M+H]+	22082.7	66159.9
289	Myricetin 3-(2''-p-Hydroxybenzoylrhamnoside)	Flavonoids	Flavonols	583.108	316.022	584.117	C28H24O14	[M-H]-	8722.98	28523.7
290	Myricetin diglucoside	Flavonoids	Flavonols	643.151	319.045	642.143	C27H30O18	[M+H]+	14709.8	16032.7
291	Myricetin-3,7,3'-trimethyl ether	Flavonoids	Flavonols	359.08	161.02	360.084	C18H16O8	[M-H]-	5.20839e+06	1.37538e+07
292	Myricetin-3-O-(6''-malony)glucoside*	Flavonoids	Flavonols	567.098	319.045	566.091	C24H22O16	[M+H]+	29867.2	6507.34
293	Myricetin-3-O-galactoside*	Flavonoids	Flavonols	481.097	319.057	480.09	C21H20O13	[M+H]+	1.17433e+07	1.29651e+06
294	Myricetin-3-O-galactoside-3'-O-rhamnoside	Flavonoids	Flavonols	627.156	319.046	626.148	C27H30O17	[M+H]+	10450.4	106892
295	Myricetin-3-O-glucoside*	Flavonoids	Flavonols	481.098	319.045	480.09	C21H20O13	[M+H]+	1.5573e+07	1.23991e+06
296	Myricetin-3-O-glucuronide	Flavonoids	Flavonols	495.077	319.045	494.07	C21H18O14	[M+H]+	5439.72	3241.15
297	Myricetin-3-O-rutinoside	Flavonoids	Flavonols	625.141	319.046	626.148	C27H30O17	[M-H]-	532555	556945
298	Naringenin (5,7,4'-Trihydroxyflavanone)*	Flavonoids	Flavanones	271.061	151.004	272.068	C15H12O5	[M-H]-	83324.7	272612
299	Naringenin chalcone; 2',4,4',6'-Tetrahydroxychalcone*	Flavonoids	Chalcones	273.076	153.018	272.068	C15H12O5	[M+H]+	0	908028
300	Naringenin-4'-O-glucoside	Flavonoids	Flavanones	433.12	271.065	434.121	C21H22O10	[M-H]-	77953	612495
301	Naringenin-7-O-glucoside (Prunin)	Flavonoids	Flavanones	433.11	271.07	434.121	C21H22O10	[M-H]-	390037	882908
302	Neosakuranin	Flavonoids	Flavanones	447.13	285.08	448.137	C22H24O10	[M-H]-	3.58526e+06	2.51568e+07
303	Nepetin (5,7,3',4'-Tetrahydroxy-6-methoxyflavone)	Flavonoids	Flavones	317.066	302.042	316.058	C16H12O7	[M+H]+	15838.7	114318
304	Nepetin-7-O-alloside*	Flavonoids	Flavones	479.12	317.06	478.111	C22H22O12	[M+H]+	1.48755e+06	6.59719e+06
305	Nepetin-7-O-glucoside(Nepitrin)*	Flavonoids	Flavones	479.12	317.06	478.111	C22H22O12	[M+H]+	3.64484e+06	1.52454e+06
306	Nobiletin (5,6,7,8,3',4'-Hexamethoxyflavone)	Flavonoids	Flavones	403.139	373.096	402.132	C21H22O8	[M+H]+	115619	127509
307	Okanin-4'-O-glucoside(Marein)*	Flavonoids	Chalcones	451.12	289.07	450.116	C21H22O11	[M+H]+	365876	691868
308	Orientin-2''-O-(6'''-(E)-Caffeoyl)-glucopyranoside	Flavonoids	Flavones	773.19	163.04	772.185	C36H36O19	[M+H]+	37389	19380.7
309	Orientin-2''-O-galactoside*	Flavonoids	Flavones	611.161	449.107	610.153	C27H30O16	[M+H]+	341022	444900
310	Orientin-2''-O-rhamnoside	Flavonoids	Flavones	595.164	449.107	594.159	C27H30O15	[M+H]+	27654.5	1.86392e+07
311	Orientin-2''-O-xyloside	Flavonoids	Flavones	581.15	449.107	580.143	C26H28O15	[M+H]+	33698	64227.3
312	Orientin-6-C-arabinoside	Flavonoids	Flavones	581.15	515.4	580.143	C26H28O15	[M+H]+	7076.04	6046.4
313	Orientin-7-O-glucoside*	Flavonoids	Flavones	611.16	449.11	610.153	C27H30O16	[M+H]+	289211	330308
314	Patuletin-3-O-glucoside*	Flavonoids	Flavonols	495.11	333.07	494.106	C22H22O13	[M+H]+	257047	226711
315	Pelargonidin-3,5-O-diglucoside	Flavonoids	Anthocyanidins	595.166	271.06	595.166	C27H31O15+	[M]+	18478.3	890877
316	Pelargonidin-3-O-(6''-O-malonyl)glucoside	Flavonoids	Anthocyanidins	519.113	271.06	519.113	C24H23O13+	[M]+	8412.48	205504
317	Pelargonidin-3-O-glucoside	Flavonoids	Anthocyanidins	433.113	271.06	433.113	C21H21O10+	[M]+	290481	7.65616e+07
318	Pelargonidin-3-O-rutinoside	Flavonoids	Anthocyanidins	579.17	271.06	579.171	C27H31O14+	[M]+	48769.9	2.88611e+07
319	Peonidin-3,5-O-diglucoside	Flavonoids	Anthocyanidins	625.176	301.071	625.176	C28H33O16+	[M]+	4631.18	161943
320	Peonidin-3-O-arabinoside	Flavonoids	Anthocyanidins	433.113	301.071	433.113	C21H21O10+	[M]+	18327.2	1.4504e+06
321	Peonidin-3-O-glucoside	Flavonoids	Anthocyanidins	463.12	301.07	463.123	C22H23O11+	[M]+	0	7.80434e+07
322	Peonidin-3-O-rutinoside	Flavonoids	Anthocyanidins	609.181	301.071	609.181	C28H33O15+	[M]+	57269.5	5.60453e+07
323	Persicoside	Flavonoids	Flavanones	477.14	315.09	478.147	C23H26O11	[M-H]-	147782	2.23118e+06
324	Phloretin	Flavonoids	Chalcones	273.077	167.032	274.084	C15H14O5	[M-H]-	2358.12	1.89344e+06
325	Phloretin-2'-O-(6''-O-xylosyl)glucoside	Flavonoids	Chalcones	567.173	273.08	568.179	C26H32O14	[M-H]-	58071.9	308309
326	Phloretin-2'-O-glucoside (Phlorizin)	Flavonoids	Chalcones	435.13	167.04	436.137	C21H24O10	[M-H]-	117613	1.79986e+06
327	Phloretin-4'-O-glucoside (Trilobatin)*	Flavonoids	Chalcones	435.13	273.08	436.137	C21H24O10	[M-H]-	212279	2.48604e+06
328	Pinocembrin (Dihydrochrysin)	Flavonoids	Flavanones	255.066	151.004	256.074	C15H12O4	[M-H]-	3980.1	4099.71
329	Poncirin (Isosakuranetin-7-O-neohesperidoside)*	Flavonoids	Flavanones	593.19	285.08	594.195	C28H34O14	[M-H]-	7.89747e+06	4.63049e+07
330	Procyanidin B1	Tannins	Proanthocyanidins	577.135	425.089	578.142	C30H26O12	[M-H]-	5319.19	170948
331	Procyanidin B2	Tannins	Proanthocyanidins	577.135	407.079	578.142	C30H26O12	[M-H]-	42466.1	1.11367e+06
332	Procyanidin B2 3'-O-Gallate	Tannins	Proanthocyanidins	729.148	407.078	730.153	C37H30O16	[M-H]-	9368.08	8866.82
333	Procyanidin B3	Tannins	Proanthocyanidins	577.135	407.076	578.142	C30H26O12	[M-H]-	7226.45	4.86445e+06
334	Procyanidin B4	Tannins	Proanthocyanidins	577.135	407.076	578.142	C30H26O12	[M-H]-	5553.05	320216
335	Procyanidin B5	Tannins	Proanthocyanidins	579.149	127.039	578.142	C30H26O12	[M+H]+	3660.35	138203
336	Procyanidin C2	Tannins	Proanthocyanidins	865.198	713.155	866.206	C45H38O18	[M-H]-	1404.19	89569.4
337	Prodelphinidin A2 3'-gallate	Tannins	Proanthocyanidins	759.122	607.111	760.128	C37H28O18	[M-H]-	67918.8	67031.5
338	Quercetagetin-7-O-glucoside(Quercetagitrin)*	Flavonoids	Flavonols	481.098	319.048	480.09	C21H20O13	[M+H]+	1.15126e+07	1.23062e+06
339	Quercetagetin; 3,3',4',5,6,7-Hexahydroxyflavone	Flavonoids	Flavonols	319.045	273.04	318.038	C15H10O8	[M+H]+	144762	261583
340	Quercetin	Flavonoids	Flavonols	303.05	137.02	302.043	C15H10O7	[M+H]+	709762	2.55869e+06
341	Quercetin-3,4'-O-di-glucoside	Flavonoids	Flavonols	627.16	303.05	626.148	C27H30O17	[M+H]+	201736	303095
342	Quercetin-3,7-Di-O-glucoside*	Flavonoids	Flavonols	627.14	303.05	626.148	C27H30O17	[M+H]+	224985	30972.4
343	Quercetin-3,7-Di-O-rhamnoside	Flavonoids	Flavonols	595.163	303.04	594.159	C27H30O15	[M+H]+	395479	601647
344	Quercetin-3-O-(2'''-O-p-coumaroyl)sophoroside-7-O-glucoside	Flavonoids	Flavonols	935.25	303.05	934.238	C42H46O24	[M+H]+	20055	28518.1
345	Quercetin-3-O-(2''-O-Rhamnosyl)rutinoside	Flavonoids	Flavonols	757.22	303.05	756.211	C33H40O20	[M+H]+	127954	139114
346	Quercetin-3-O-(2''-O-acetyl)glucuronide	Flavonoids	Flavonols	519.078	300	520.085	C23H20O14	[M-H]-	20317.8	46917.5
347	Quercetin-3-O-(2''-O-galactosyl)glucoside	Flavonoids	Flavonols	627.16	465.1	626.148	C27H30O17	[M+H]+	286856	498608
348	Quercetin-3-O-(2''-O-malonyl)glucoside-7-O-arabinoside	Flavonoids	Flavonols	683.15	303.05	682.138	C29H30O19	[M+H]+	6671.67	80898.3
349	Quercetin-3-O-(2''-O-rhamnosyl)galactoside*	Flavonoids	Flavonols	611.16	303.05	610.153	C27H30O16	[M+H]+	148503	4.18319e+06
350	Quercetin-3-O-(4''-O-glucosyl)rhamnoside*	Flavonoids	Flavonols	611.16	303.05	610.153	C27H30O16	[M+H]+	4.3727e+06	5.12731e+06
351	Quercetin-3-O-(4''-glucosyl)glucoside; Meratin*	Flavonoids	Flavonols	627.15	303.05	626.148	C27H30O17	[M+H]+	211908	35852.3
352	Quercetin-3-O-(6''-O-acetyl)galactoside	Flavonoids	Flavonols	505.1	300.03	506.106	C23H22O13	[M-H]-	424157	1.34167e+06
353	Quercetin-3-O-(6''-O-acetyl)glucoside	Flavonoids	Flavonols	507.12	303.05	506.106	C23H22O13	[M+H]+	1.58946e+06	2.42163e+07
354	Quercetin-3-O-(6''-O-arabinosyl)glucoside*	Flavonoids	Flavonols	597.14	303.05	596.138	C26H28O16	[M+H]+	457941	1.75763e+06
355	Quercetin-3-O-(6''-O-galloyl)galactoside	Flavonoids	Flavonols	617.114	303.051	616.106	C28H24O16	[M+H]+	0	4055.5
356	Quercetin-3-O-(6''-O-p-Coumaroyl)galactoside	Flavonoids	Flavonols	611.14	147.04	610.132	C30H26O14	[M+H]+	868450	4.4244e+06
357	Quercetin-3-O-(6''-O-p-Coumaroyl)glucoside	Flavonoids	Flavonols	611.14	147.04	610.132	C30H26O14	[M+H]+	904061	4.49314e+06
358	Quercetin-3-O-Sambubioside-5-O-Glucoside	Flavonoids	Flavonols	759.199	303.05	758.191	C32H38O21	[M+H]+	17954.7	17346.6
359	Quercetin-3-O-Sulfonate	Flavonoids	Flavonols	380.992	301.036	382	C15H10O10S	[M-H]-	60711	249788
360	Quercetin-3-O-[rhamnosyl(1→2)glucosyl]-5-O-glucoside*	Flavonoids	Flavonols	773.21	303.05	772.206	C33H40O21	[M+H]+	142336	216802
361	Quercetin-3-O-alloside; Isohyperoside*	Flavonoids	Flavonols	465.102	303.061	464.096	C21H20O12	[M+H]+	1.34161e+07	2.74769e+07
362	Quercetin-3-O-apiosyl(1→2)galactoside*	Flavonoids	Flavonols	597.14	303.04	596.138	C26H28O16	[M+H]+	441663	1.62645e+06
363	Quercetin-3-O-arabinoside	Flavonoids	Flavonols	433.08	300.03	434.085	C20H18O11	[M-H]-	627040	1.41892e+06
364	Quercetin-3-O-galactoside (Hyperin)*	Flavonoids	Flavonols	465.1	303.06	464.096	C21H20O12	[M+H]+	2.39021e+06	2.35367e+07
365	Quercetin-3-O-glucoside (Isoquercitrin)*	Flavonoids	Flavonols	465.1	303.05	464.096	C21H20O12	[M+H]+	2.18212e+06	1.91596e+07
366	Quercetin-3-O-glucoside-7-O-rhamnoside*	Flavonoids	Flavonols	611.16	303.05	610.153	C27H30O16	[M+H]+	3.74081e+06	6.20258e+06
367	Quercetin-3-O-glucuronide	Flavonoids	Flavonols	479.09	303.05	478.075	C21H18O13	[M+H]+	20944.3	96660.3
368	Quercetin-3-O-rhamnoside(Quercitrin)	Flavonoids	Flavonols	449.108	303.05	448.101	C21H20O11	[M+H]+	749231	9.75058e+06
369	Quercetin-3-O-robinobioside*	Flavonoids	Flavonols	611.16	303.05	610.153	C27H30O16	[M+H]+	3.93178e+06	5.75301e+06
370	Quercetin-3-O-rutinoside (Rutin)*	Flavonoids	Flavonols	611.16	303.05	610.153	C27H30O16	[M+H]+	4.24018e+06	5.95968e+06
371	Quercetin-3-O-rutinoside-7-O-glucoside*	Flavonoids	Flavonols	773.21	303.05	772.206	C33H40O21	[M+H]+	172819	129727
372	Quercetin-3-O-rutinoside-7-O-rhamnoside	Flavonoids	Flavonols	757.21	303.05	756.211	C33H40O20	[M+H]+	1.31394e+06	2.09045e+06
373	Quercetin-3-O-sambubioside*	Flavonoids	Flavonols	597.14	303.05	596.138	C26H28O16	[M+H]+	351222	1.54235e+06
374	Quercetin-3-O-sophoroside (Baimaside)	Flavonoids	Flavonols	627.16	303.06	626.148	C27H30O17	[M+H]+	1.1795e+06	1.37359e+06
375	Quercetin-3-O-sophoroside-7-O-rhamnoside*	Flavonoids	Flavonols	773.213	303.051	772.206	C33H40O21	[M+H]+	105114	190717
376	Quercetin-3-O-xyloside (Reynoutrin)*	Flavonoids	Flavonols	435.09	303.06	434.085	C20H18O11	[M+H]+	1.04426e+07	3.39096e+07
377	Quercetin-3-O-xylosyl(1→2)arabinoside	Flavonoids	Flavonols	567.13	303.05	566.127	C25H26O15	[M+H]+	10337.4	19463.7
378	Quercetin-3-O-α-rhamnosyl (1→2)-[α-rhamnosyl (1→6)]-β-glucoside	Flavonoids	Flavonols	757.22	303.05	756.211	C33H40O20	[M+H]+	24419.5	2854.43
379	Quercetin-4'-O-glucoside (Spiraeoside)	Flavonoids	Flavonols	463.09	301.04	464.096	C21H20O12	[M-H]-	1.007e+06	4.65647e+06
380	Quercetin-4'-O-glucuronide*	Flavonoids	Flavonols	477.07	301.04	478.075	C21H18O13	[M-H]-	641759	1.97622e+06
381	Quercetin-5,4'-di-O-glucoside	Flavonoids	Flavonols	627.15	303.05	626.148	C27H30O17	[M+H]+	20536.5	62535
382	Quercetin-5-O-glucuronide*	Flavonoids	Flavonols	479.082	303.064	478.075	C21H18O13	[M+H]+	9820.3	10434.7
383	Quercetin-5-O-β-D-glucoside*	Flavonoids	Flavonols	465.1	303.05	464.096	C21H20O12	[M+H]+	2.39716e+06	1.86989e+07
384	Quercetin-7-O-(2''-malonyl)glucosyl-5-O-glucoside	Flavonoids	Flavonols	713.15	303.06	712.149	C30H32O20	[M+H]+	10641.5	127916
385	Quercetin-7-O-(6''-malonyl)glucoside	Flavonoids	Flavonols	551.1	303.05	550.096	C24H22O15	[M+H]+	519845	2.18398e+06
386	Quercetin-7-O-glucoside	Flavonoids	Flavonols	463.09	301.04	464.096	C21H20O12	[M-H]-	950428	4.10025e+06
387	Quercetin-7-O-rutinoside*	Flavonoids	Flavonols	611.16	303.05	610.153	C27H30O16	[M+H]+	5.30206e+06	6.07313e+06
388	Quercetin-7-O-rutinoside-4'-O-glucoside	Flavonoids	Flavonols	773.21	303.05	772.206	C33H40O21	[M+H]+	75442.2	120378
389	Rhamnetin-3-O-Glucoside*	Flavonoids	Flavonols	479.12	317.07	478.111	C22H22O12	[M+H]+	3.5405e+06	2.38516e+06
390	Rhamnetin-3-O-Rutinoside*	Flavonoids	Flavonols	625.166	317.066	624.169	C28H32O16	[M+H]+	3.12538e+06	519815
391	Robinson-7-O-Neohesperidin*	Flavonoids	Flavonols	593.187	285.077	592.179	C28H32O14	[M+H]+	10311.2	28485.5
392	Sciadopitysin*	Flavonoids	Biflavones	581.144	581.14	580.137	C33H24O10	[M+H]+	186654	237811
393	Scutellarein-4'-methyl ether (5,6,7-Trihydroxy-4'-methoxyflavone)	Flavonoids	Flavones	301.07	258.05	300.063	C16H12O6	[M+H]+	45197.9	64352.2
394	Scutellarein-7-O-glucuronide (Scutellarin)*	Flavonoids	Flavones	463.087	287.055	462.08	C21H18O12	[M+H]+	103172	73354.4
395	Sieboldin	Flavonoids	Chalcones	451.123	289.07	452.132	C21H24O11	[M-H]-	35149	41917.8
396	Silydianin	Tannins	Tannin	483.129	153.02	482.121	C25H22O10	[M+H]+	45231.4	11824.6
397	Sinensetin (5,6,7,3',4'-pentamethoxyflavone)*	Flavonoids	Flavones	373.128	312.101	372.121	C20H20O7	[M+H]+	25957.4	34594.5
398	Strictinin*	Tannins	Tannin	633.072	301	634.081	C27H22O18	[M-H]-	151474	170489
399	Swertiajaponin	Flavonoids	Flavones	463.123	313.071	462.116	C22H22O11	[M+H]+	19838.5	308144
400	Swertisin	Flavonoids	Flavones	447.129	411.107	446.121	C22H22O10	[M+H]+	440798	793047
401	Syringetin-7-O-glucoside*	Flavonoids	Flavonols	509.129	347.076	508.122	C23H24O13	[M+H]+	199086	367591
402	Tamarixetin-3-O-(6''-malonyl)glucoside*	Flavonoids	Flavonols	565.12	317.07	564.111	C25H24O15	[M+H]+	321661	1.74606e+06
403	Tamarixetin-3-O-glucoside (Tamarixin)	Flavonoids	Flavonols	479.12	317.06	478.111	C22H22O12	[M+H]+	1.73756e+06	2.26305e+06
404	Tamarixetin-3-O-rutinoside	Flavonoids	Flavonols	623.16	315.05	624.169	C28H32O16	[M-H]-	1.49265e+07	2.51084e+06
405	Tangeretin (4',5,6,7,8-Pentamethoxyflavone)	Flavonoids	Flavones	373.128	343.09	372.121	C20H20O7	[M+H]+	9773.61	11406.6
406	Taxifolin(Dihydroquercetin)	Flavonoids	Flavanonols	303.051	125.024	304.058	C15H12O7	[M-H]-	70050.3	907470
407	Taxifolin-2-O-glucoside	Flavonoids	Flavanonols	465.1	303.05	466.111	C21H22O12	[M-H]-	102841	4.17685e+06
408	Taxifolin-3-O-rhamnoside (Astilbin)	Flavonoids	Flavanonols	449.109	303.08	450.116	C21H22O11	[M-H]-	17766.8	44840
409	Taxifolin-7-O-rhamnoside	Flavonoids	Flavanonols	451.123	305.057	450.116	C21H22O11	[M+H]+	682622	1.15097e+06
410	Tricetin (5,7,3',4',5'-Pentahydroxyflavone)	Flavonoids	Flavones	301.035	151.004	302.043	C15H10O7	[M-H]-	543905	340018
411	Tricetin 3'-glucuronide*	Flavonoids	Flavones	477.07	301.04	478.075	C21H18O13	[M-H]-	650488	2.05399e+06
412	Tricetin-5-O-(6''-malonyl)glucoside	Flavonoids	Flavones	551.103	303.05	550.096	C24H22O15	[M+H]+	587511	3.00209e+06
413	Tricin (5,7,4'-Trihydroxy-3',5'-dimethoxyflavone)	Flavonoids	Flavones	331.081	315.05	330.074	C17H14O7	[M+H]+	24786.6	27654.4
414	Tricin-4'-O-(guaiacylglycerol)ether	Flavonoids	Flavones	527.155	331.081	526.148	C27H26O11	[M+H]+	8936.57	10903.6
415	Tricin-4'-O-(guaiacylglycerol)ether-7-O-glucoside	Flavonoids	Flavones	689.208	331.081	688.2	C33H36O16	[M+H]+	24253.3	26167.2
416	Tricin-4'-O-glucoside*	Flavonoids	Flavones	493.134	331.081	492.127	C23H24O12	[M+H]+	7.538e+06	393172
417	Tricin-4'-O-glycerol	Flavonoids	Flavones	403.103	313.1	404.111	C20H20O9	[M-H]-	13471.1	28591.8
418	Tricin-4'-O-syringic acid	Flavonoids	Flavones	511.12	331.08	510.116	C26H22O11	[M+H]+	76682.4	8569.51
419	Tricin-5-O-Glucoside	Flavonoids	Flavones	491.12	329.1	492.127	C23H24O12	[M-H]-	284258	418780
420	Tricin-5-O-guaiacylglycerol	Flavonoids	Flavones	527.155	331.081	526.148	C27H26O11	[M+H]+	22333.4	14658.3
421	Tricin-7-O-(6''-O-malonyl)glucoside	Flavonoids	Flavones	579.135	331.083	578.127	C26H26O15	[M+H]+	19756.4	30615.4
422	Tricin-7-O-Glucoside*	Flavonoids	Flavones	493.134	331.081	492.127	C23H24O12	[M+H]+	295723	242694
423	Tricin-7-O-neohesperidoside*	Flavonoids	Flavones	639.192	331.082	638.185	C29H34O16	[M+H]+	19893.8	18943.5
424	Tricin-7-O-rutinoside*	Flavonoids	Flavones	639.192	331.081	638.185	C29H34O16	[M+H]+	19893.8	18943.5
425	Troxerutin	Flavonoids	Flavones	743.239	435.137	742.232	C33H42O19	[M+H]+	0	957239
426	Vicenin-2,6''-O-Glucoside	Flavonoids	Flavones	757.216	577.152	756.211	C33H40O20	[M+H]+	179732	41274.8
427	Vicenin-3	Flavonoids	Flavones	563.141	353.087	564.148	C26H28O14	[M-H]-	70218.5	135692
428	Vitexin-2''-O-galactoside	Flavonoids	Flavones	595.168	433.116	594.159	C27H30O15	[M+H]+	742825	1.85038e+06
429	Vitexin-2''-O-glucoside	Flavonoids	Flavones	595.166	577.156	594.159	C27H30O15	[M+H]+	192277	246989
430	Vitexin-2''-O-xyloside	Flavonoids	Flavones	565.156	433.114	564.148	C26H28O14	[M+H]+	28455.8	28409.2
431	catechin-3-O-α-L-rhamnopyranoside	Flavonoids	Flavanols	437.144	139.038	436.137	C21H24O10	[M+H]+	3050.35	22959.2
432	catechin-4-β-D-galactopyranoside*	Flavonoids	Flavanols	451.12	289.07	452.132	C21H24O11	[M-H]-	60458.6	3.73726e+06
