# Supplementary material for: Integrated Metabolome and Transcriptome Analyses Reveal That the Flavonoid Metabolic Pathway Is Associated with Pigment Differential Accumulation in Two Colors of Petaloid Staminodes in Canna glauca
Source: MDPI journal article supplement (doi:10.3390/horticulturae10040372), 2024-04-07
Supplement: s1 [file s1 › Supplementary Table S3.xlsx]

## Sheet: Sheet1
Supplementary Table S3 The differentially accumulated flavonoids in CgpsP vs CgpsY
Number	Compounds	Class I	Class II	Formula	CgpsP_mean	CgpsY_mean	VIP	P-value	FDR	Fold_Change	Log2FC	Type
1	2',8''-Biapigenin*	Flavonoids	Biflavones	C30H18O10	28993.1	98829.6	1.16457	0.0156258	0.0327687	0.293364	-1.76924	down
2	2,3-Dihydroamentoflavone	Flavonoids	Biflavones	C30H20O10	9791.27	35020.2	1.06934	0.0147364	0.0318775	0.279589	-1.83862	down
3	3',4,4',5,7-Pentahydroxyflavan (Luteoforol)	Flavonoids	Flavanols	C15H14O6	88162.7	8636.42	1.14106	0.00703326	0.0178728	10.2083	3.35166	up
4	3',5',5,7-Tetrahydroxy-4'-methoxyflavanone-3'-O-glucoside	Flavonoids	Flavones	C22H24O12	1.62113e+06	1.57057e+07	1.20225	0.00692997	0.0177145	0.103219	-3.27621	down
5	3',7-dihydroxy-4'-methoxyflavone	Flavonoids	Flavones	C16H12O5	88736.6	12229.1	1.11627	0.0325695	0.0606467	7.25619	2.85921	up
6	3',8''-Biapigenin*	Flavonoids	Biflavones	C30H18O10	18178.3	75605.5	1.15366	0.0123675	0.0275401	0.240437	-2.05627	down
7	3'-O-Methyltricetin-7-O-(6''-malonyl)glucoside*	Flavonoids	Flavones	C25H24O15	1.78597e+06	398076	1.20258	0.00284439	0.00916998	4.4865	2.16559	up
8	3'-O-Methyltricetin-7-O-glucoside	Flavonoids	Flavones	C22H22O12	725278	144447	1.10433	0.00311374	0.00981851	5.02106	2.32799	up
9	3'-methoxyquercetin-3-O-L-rhamnosyl(1→2)-glucopyranoside*	Flavonoids	Flavonols	C28H32O16	559875	1.44101e+06	1.16004	0.00102531	0.00486738	0.38853	-1.3639	down
10	3,3',4',5',7-Pentahydroxyflavone; Robinetin	Flavonoids	Flavonols	C15H10O7	1.74571e+06	225513	1.19063	0.0010742	0.00494965	7.74108	2.95254	up
11	3,3',4-O-Trimethylellagic acid	Tannins	Tannin	C17H12O8	304214	8031.42	1.17324	2.5869e-05	0.000588178	37.878	5.24329	up
12	3,3'-O-Dimethylellagic Acid	Tannins	Tannin	C16H10O8	27753.4	11171.8	1.08219	0.0748198	0.118832	2.48423	1.3128	up
13	3,4,2',4',6'-Pentahydroxychalcone	Flavonoids	Chalcones	C15H12O6	129418	24125.4	1.20387	4.04076e-06	0.000238266	5.36442	2.42342	up
14	3,4,2',4',6'-Pentahydroxychalcone-4'-O-glucoside	Flavonoids	Chalcones	C21H22O11	3.75902e+06	74283.1	1.19797	0.000913849	0.0045905	50.604	5.66118	up
15	3,5,7,4'-Tetrahydroxy-8-methoxyflavone-3-O-glucoside-7-O-rhamnoside*	Flavonoids	Flavonols	C28H32O16	576207	1.92649e+06	1.08182	0.0736786	0.117886	0.299097	-1.74132	down
16	3,5,7-Trihydroxy-8,4'-dimethoxyflavone-7-O-glucoside*	Flavonoids	Flavonols	C23H24O12	432909	6.60434e+06	1.20477	0.000588109	0.00343328	0.0655492	-3.93128	down
17	3,5,7-Trihydroxyflavanone (Pinobanksin)*	Flavonoids	Flavanonols	C15H12O5	259208	88128.3	1.19419	0.00649123	0.0168928	2.94126	1.55643	up
18	3-Hydroxyphloretin	Flavonoids	Chalcones	C15H14O6	94892.7	2807.8	1.16985	0.0569819	0.0954234	33.7962	5.07879	up
19	3-Methylkaempferol	Flavonoids	Flavonols	C16H12O6	90010.3	28113	1.17775	0.00297001	0.00943415	3.20173	1.67885	up
20	3-O-Methylellagic acid	Tannins	Tannin	C15H8O8	167141	38688.7	1.20088	0.000350991	0.0027702	4.32015	2.11108	up
21	3-O-Methylellagic acid 4'-rhamnoside	Tannins	Tannin	C21H18O12	18172.7	3322.75	1.02181	0.00330206	0.010117	5.46917	2.45132	up
22	3-O-Methylellagic acid 4'-sulfate*	Tannins	Tannin	C15H8O11S	20815.9	234628	1.13366	0.000356174	0.0027702	0.0887187	-3.49462	down
23	3-O-Methylellagic acid 4-sulfate*	Tannins	Tannin	C15H8O11S	25446.7	236527	1.09601	0.00207301	0.00722209	0.107585	-3.21645	down
24	3-O-Methylquercetin	Flavonoids	Flavonols	C16H12O7	60219.1	19181.7	1.18036	0.0247383	0.0481666	3.13941	1.65049	up
25	4'-Hydroxy-3,5-dimethoxydihydrochalcone	Flavonoids	Chalcones	C17H18O4	494224	40364.8	1.17975	0.000508489	0.0031381	12.2439	3.614	up
26	5,2',5'-Trihydroxy-3,7,4'-trimethoxyflavone-2'-O-β-D-glucoside	Flavonoids	Flavones	C24H26O13	43479.5	527514	1.20011	0.001081	0.00494965	0.0824234	-3.6008	down
27	5,3'-dihydroxy-6,7,4'-trimethoxyflavone-8-O-β-D-glucoside*	Flavonoids	Flavones	C23H24O12	525209	7.54394e+06	1.205	0.000585171	0.00343328	0.06962	-3.84436	down
28	5,4'-Dihydroxy-3,7-dimethoxyflavone(Kumatakenin)	Flavonoids	Flavonols	C17H14O6	33279.2	12312.8	1.1373	0.00168394	0.00624331	2.70282	1.43446	up
29	5,6,3',4'-Tetrahydroxy-3,7-dimethoxyflavone	Flavonoids	Flavones	C17H14O8	32248.1	69125.8	1.13289	0.0195181	0.0392402	0.466514	-1.10001	down
30	5,7,4'-Trihydroxy-8-methylflavonoid	Flavonoids	Flavonols	C16H14O6	808096	209974	1.17692	0.00093916	0.00461042	3.84856	1.94432	up
31	5-Hydroxy-3',4',7-trimethoxyflavone glucoside	Flavonoids	Flavones	C24H26O11	49808.2	588237	1.17771	1.58059e-05	0.000490406	0.0846736	-3.56194	down
32	5-hydroxy-6,7,3',4',5'-pentamethoxyflavone glucoside	Flavonoids	Flavones	C26H30O13	552942	180338	1.10355	0.0530464	0.0902206	3.06615	1.61643	up
33	6-C-MethylKaempferol-3-glucoside*	Flavonoids	Flavones	C22H22O11	1.03938e+07	3.89001e+06	1.20146	0.00010427	0.00112611	2.67191	1.41787	up
34	6-C-Methylquercetin-3-O-rhamnoside	Flavonoids	Flavonols	C22H22O11	64422.6	238440	1.19681	4.45583e-05	0.000740353	0.270184	-1.88799	down
35	6-Hydroxy-4'-O-Methylamentoflavone	Flavonoids	Biflavones	C31H20O11	26356.1	118309	1.0131	0.00786694	0.0195317	0.222773	-2.16635	down
36	6-Hydroxykaempferol-7-O-glucoside	Flavonoids	Flavonols	C21H20O12	2.75929e+07	1.1757e+07	1.07164	0.0972945	0.147997	2.34693	1.23077	up
37	7,3',4'-Trihydroxyquercetin glucoside	Flavonoids	Flavones	C24H26O12	1.84836e+06	759101	1.17713	0.00321664	0.0100695	2.43493	1.28388	up
38	7,8,3',4'-tetrahydroxyflavanonol	Flavonoids	Flavonols	C15H12O7	269945	9666.27	1.16318	0.000169283	0.0017412	27.9264	4.80356	up
39	7-MethoxyAmentoflavanone	Flavonoids	Biflavones	C31H24O10	3291.35	21729	1.06331	0.000478345	0.0031381	0.151473	-2.72287	down
40	8-Prenyl-7,4'-dihydroxy-5-methoxydihydroflavonol	Flavonoids	Flavonols	C21H22O6	33671.1	3.20543e+06	1.17907	0.00477647	0.0133989	0.0105044	-6.57286	down
41	Aesculitannin A	Tannins	Tannin	C45H36O18	26387.6	3326.68	1.10414	0.00273742	0.00895884	7.93214	2.98771	up
42	Amentoflavone*	Flavonoids	Biflavones	C30H18O10	28993.1	98829.6	1.16457	0.0156258	0.0327687	0.293364	-1.76924	down
43	Apiferol	Flavonoids	Flavones	C15H14O5	29141.1	2218.11	1.1793	0.00258949	0.00867178	13.1378	3.71565	up
44	Apigenin-4'-O-glucoside*	Flavonoids	Flavones	C21H20O10	475604	73359.2	1.19638	0.00343567	0.0103359	6.48323	2.69671	up
45	Apigenin-6-C-xyloside-8-C-arabinoside	Flavonoids	Flavones	C25H26O13	70479.4	286791	1.16552	0.0110954	0.0254949	0.245752	-2.02473	down
46	Apigenin-7-O-(6''-malonyl)glucoside	Flavonoids	Flavones	C24H22O13	58134.4	13482.4	1.09793	0.0110082	0.0254307	4.31187	2.10831	up
47	Apigenin-7-O-glucoside(Cosmosiin)*	Flavonoids	Flavones	C21H20O10	489441	93337.6	1.17536	0.0015422	0.00594847	5.24377	2.3906	up
48	Avicularin(Quercetin-3-O-α-L-arabinofuranoside)*	Flavonoids	Flavonols	C20H18O11	2.56049e+07	8.80856e+06	1.19825	0.000864425	0.00444562	2.90682	1.53944	up
49	Biondnoid I*	Flavonoids	Flavonols	C30H26O13	4.65104e+06	61890.3	1.20004	0.00374996	0.0109458	75.1497	6.2317	up
50	Butin; 7,3',4'-Trihydroxyflavanone*	Flavonoids	Flavanones	C15H12O5	165933	48416.4	1.19011	8.25879e-05	0.00104935	3.4272	1.77703	up
51	Catechin*	Flavonoids	Flavanols	C15H14O6	1.4175e+06	5465.63	1.20175	5.98434e-05	0.000807885	259.348	8.01875	up
52	Catechin-(7,8-bc)-4α-(3,4-dihydroxyphenyl)-dihydro-2-(3H)-one	Flavonoids	Flavanols	C24H20O9	160747	29575.6	1.202	0.00119353	0.00515212	5.43514	2.44232	up
53	Chrysoeriol-5-O-glucoside	Flavonoids	Flavones	C22H22O11	4.91518e+07	8.61822e+06	1.20461	1.58928e-05	0.000490406	5.70324	2.51178	up
54	Chrysoeriol-6-C-glucoside-4'-O-glucoside*	Flavonoids	Flavones	C28H32O16	113687	583345	1.16441	0.000235401	0.00221072	0.194889	-2.35928	down
55	Chrysoeriol-8-C-glucoside (Scoparin)*	Flavonoids	Flavones	C22H22O11	1.98144e+06	373272	1.19789	0.00882734	0.021304	5.3083	2.40825	up
56	Cupressuflavone*	Flavonoids	Biflavones	C30H18O10	18178.3	75605.5	1.15366	0.0123675	0.0275401	0.240437	-2.05627	down
57	Cyanidin-3,5-O-diglucoside (Cyanin)	Flavonoids	Anthocyanidins	C27H31O16+	9.28024e+06	32910.6	1.20486	0.00026823	0.00231352	281.983	8.13946	up
58	Cyanidin-3-O-(6''-O-acetyl)glucoside	Flavonoids	Anthocyanidins	C23H23O12+	3.24371e+06	12208.7	1.17488	0.000695729	0.00395467	265.688	8.05359	up
59	Cyanidin-3-O-(6''-O-malonyl)glucoside	Flavonoids	Anthocyanidins	C24H23O14+	4.89057e+06	13537.2	1.18897	5.57276e-05	0.000802478	361.268	8.49692	up
60	Cyanidin-3-O-arabinoside*	Flavonoids	Anthocyanidins	C20H19O10+	4.03494e+07	37924.4	1.19502	0.00027848	0.00231352	1063.94	10.0552	up
61	Cyanidin-3-O-galactoside*	Flavonoids	Anthocyanidins	C21H21O11+	5.45372e+07	127428	1.20274	4.83791e-05	0.000746421	427.986	8.74142	up
62	Cyanidin-3-O-gentiobioside	Flavonoids	Anthocyanidins	C27H31O16+	1.07268e+07	19914.5	1.19457	0.000470325	0.0031381	538.644	9.07319	up
63	Cyanidin-3-O-glucoside (Kuromanin)*	Flavonoids	Anthocyanidins	C21H21O11+	5.54007e+07	122599	1.20269	0.00040473	0.00297401	451.885	8.81981	up
64	Cyanidin-3-O-rutinoside (Keracyanin)	Flavonoids	Anthocyanidins	C27H31O15+	8.8095e+07	208846	1.20256	8.75479e-05	0.00105372	421.818	8.72048	up
65	Cyanidin-3-O-sambubioside[Cyanidin-3-O-(2''-O-xylosyl)glucoside]	Flavonoids	Anthocyanidins	C26H29O15+	1.05521e+07	41607.3	1.19427	0.0166771	0.034637	253.613	7.98649	up
66	Cyanidin-3-O-xyloside*	Flavonoids	Anthocyanidins	C20H19O10+	4.03494e+07	37924.4	1.19502	0.00027848	0.00231352	1063.94	10.0552	up
67	Didymin (Isosakuranetin-7-O-rutinoside)*	Flavonoids	Flavanones	C28H34O14	1.56063e+07	2.75416e+06	1.20469	0.000957732	0.00464877	5.66646	2.50245	up
68	Dihydrocharcone-4'-O-glucoside*	Flavonoids	Chalcones	C21H24O10	2.42445e+06	210857	1.20528	9.07371e-05	0.00105942	11.498	3.52332	up
69	Dihydrokaempferide	Flavonoids	Flavanonols	C16H14O6	813351	165441	1.18948	0.00140174	0.00560695	4.91626	2.29756	up
70	Dihydromyricetin-3-O-glucoside	Flavonoids	Flavanonols	C21H22O13	137658	419509	1.01443	0.114947	0.168902	0.328141	-1.60761	down
71	Diosmetin-7-O-galactoside*	Flavonoids	Flavones	C22H22O11	1.08694e+07	3.7918e+06	1.20474	0.000359099	0.0027702	2.86656	1.51932	up
72	Diosmetin-7-O-glucoside*	Flavonoids	Flavones	C22H22O11	1.08728e+07	3.97287e+06	1.19971	1.45474e-05	0.000490406	2.73677	1.45247	up
73	Diosmetin-7-O-rutinoside (Diosmin)*	Flavonoids	Flavones	C28H32O15	325384	149578	1.15672	0.00346922	0.0103359	2.17535	1.12124	up
74	Epicatechin*	Flavonoids	Flavanols	C15H14O6	130631	10914.1	1.19605	0.00342472	0.0103359	11.969	3.58123	up
75	Epicatechin-3'-O-β-D-glucopyranoside*	Flavonoids	Flavanols	C21H24O11	3.88367e+06	56767.9	1.20431	0.000992275	0.00476292	68.4131	6.0962	up
76	Epigallocatechin	Flavonoids	Flavanols	C15H14O7	947598	10382.6	1.19166	5.88767e-05	0.000807885	91.2678	6.51203	up
77	Eriodictyol (5,7,3',4'-Tetrahydroxyflavanone)	Flavonoids	Flavanones	C15H12O6	156326	22966.6	1.2049	1.44114e-05	0.000490406	6.80665	2.76694	up
78	Eriodictyol-3'-O-glucoside*	Flavonoids	Flavanones	C21H22O11	1.82703e+06	332582	1.20206	8.063e-07	8.70804e-05	5.49347	2.45772	up
79	Eriodictyol-7-O-(6''-O-p-coumaroyl)glucoside	Flavonoids	Flavanones	C30H28O13	392517	75167.6	1.20275	0.00257329	0.00867178	5.22189	2.38457	up
80	Eriodictyol-7-O-(6''-malonyl)glucoside	Flavonoids	Flavanones	C24H24O14	1.93343e+06	182707	1.1909	0.000746314	0.00413343	10.5821	3.40355	up
81	Eriodictyol-7-O-rutinoside-4'-O-Sophoroside	Flavonoids	Flavanones	C39H52O25	28660.8	145173	1.13764	0.00111005	0.00494965	0.197425	-2.34062	down
82	Eriodictyol-8-C-glucoside-4'-O-glucoside	Flavonoids	Flavanones	C27H32O16	393426	1.16326e+06	1.1969	0.000420195	0.0029758	0.338211	-1.56401	down
83	Eupatilin-7-O-glucoside	Flavonoids	Flavones	C24H26O12	124226	361802	1.16908	0.000411014	0.00297401	0.343353	-1.54224	down
84	Fisetin	Flavonoids	Flavonols	C15H10O6	2.06387e+06	241254	1.20237	0.00145897	0.00578236	8.55474	3.09672	up
85	Gallocatechin-(4α→8)-Catechin-(4α→8)-Catechin	Flavonoids	Flavanols	C45H38O19	141700	6207.04	1.13915	0.0170701	0.0352837	22.8289	4.51279	up
86	Ginnalin A (2,6-Di-O-Galloyl-1,5-Anhydro-D-Glucitol)	Tannins	Tannin	C20H20O13	51919.6	2804.11	1.19666	0.00025466	0.00231352	18.5155	4.21066	up
87	Gossypetin-3-O-glucoside*	Flavonoids	Flavonols	C21H20O13	1.2641e+06	1.49852e+07	1.20504	0.000413057	0.00297401	0.0843566	-3.56736	down
88	Gossypetin-8-O-glucoside	Flavonoids	Flavonols	C21H20O13	186831	5.76281e+06	1.18835	2.67698e-06	0.000202973	0.0324202	-4.94696	down
89	Herbacetin	Flavonoids	Flavonols	C15H10O7	107768	19442.7	1.19404	0.00637738	0.0166972	5.54287	2.47063	up
90	Herbacetin-7-O-rhamnoside-8-O-glucoside; Rhodionidin*	Flavonoids	Flavonols	C27H30O16	4.18319e+06	148503	1.18683	0.0833147	0.129467	28.1691	4.81604	up
91	Hesperetin	Flavonoids	Flavanones	C16H14O6	2.24967e+06	130588	1.19958	0.018334	0.0371845	17.2272	4.10662	up
92	Hesperetin-5-O-glucoside	Flavonoids	Flavanones	C22H24O11	5.16018e+06	1.05342e+06	1.20436	4.41234e-06	0.000238266	4.89852	2.29235	up
93	Hesperetin-7-O-(6''-malonyl)glucoside	Flavonoids	Flavanones	C25H26O14	260721	40266.9	1.09596	0.137068	0.195424	6.47482	2.69484	up
94	Hesperetin-7-O-glucoside*	Flavonoids	Flavanones	C22H24O11	2.76453e+06	522540	1.18615	0.0182436	0.0371756	5.29056	2.40342	up
95	Hispidulin-7-O-glucoside(Homoplantaginin)*	Flavonoids	Flavones	C22H22O11	1.15027e+07	4.34864e+06	1.20106	0.00090194	0.00458398	2.64512	1.40333	up
96	Hispidulin-8-C-(2''-O-glucosyl)glucoside*	Flavonoids	Flavones	C28H32O16	95933	400358	1.17648	0.000214755	0.0021085	0.239618	-2.06119	down
97	Hispidulin-8-C-glucoside*	Flavonoids	Flavones	C22H22O11	153999	358529	1.17068	0.0257721	0.0494823	0.42953	-1.21917	down
98	Homoeriodictyol-7-O-β-O-glucoside*	Flavonoids	Flavanones	C22H24O11	3.17671e+06	621082	1.19273	0.0154239	0.0326623	5.1148	2.35468	up
99	Isorhamnetin-3-O-(6''-acetylglucoside)	Flavonoids	Flavonols	C24H24O13	1.56698e+06	621092	1.19851	0.00075721	0.0041407	2.52294	1.3351	up
100	Isorhamnetin-3-O-(6''-malonyl)glucoside*	Flavonoids	Flavonols	C25H24O15	1.89188e+06	362927	1.19208	0.0149791	0.0320344	5.21285	2.38207	up
101	Isorhamnetin-3-O-Glucoside*	Flavonoids	Flavonols	C22H22O12	1.42818e+06	3.93987e+06	1.06675	0.0109606	0.0254307	0.362494	-1.46397	down
102	Isorhamnetin-3-O-arabinoside	Flavonoids	Flavonols	C21H20O11	249456	110068	1.15126	0.0275975	0.0520617	2.26637	1.18039	up
103	Isorhamnetin-3-O-galactoide-7-O-rhamnoside*	Flavonoids	Flavonols	C28H32O16	1.21348e+06	35978.9	1.14409	0.000499183	0.0031381	33.7276	5.07586	up
104	Isorhamnetin-3-O-glucoside-7-O-rhamnoside*	Flavonoids	Flavonols	C28H32O16	1.21348e+06	35978.9	1.14409	0.000499183	0.0031381	33.7276	5.07586	up
105	Isorhamnetin-3-O-neohesperidoside*	Flavonoids	Flavonols	C28H32O16	435947	1.52053e+06	1.11328	0.00152227	0.00594847	0.286707	-1.80235	down
106	Isorhamnetin-7-O-glucoside (Brassicin)*	Flavonoids	Flavonols	C22H22O12	6.59719e+06	1.48755e+06	1.16159	0.00111138	0.00494965	4.43492	2.14891	up
107	Isorhamnetin; 3'-Methoxy-3,4',5,7-Tetrahydroxyflavone	Flavonoids	Flavonols	C16H12O7	389598	21352.7	1.19836	3.86273e-05	0.000715139	18.2458	4.18949	up
108	Isoscutellarein	Flavonoids	Flavones	C15H10O6	1.05082e+06	105105	1.11898	0.0043849	0.0123809	9.99788	3.32162	up
109	Isovitexin-2''-O-(6'''-p-coumaroyl)glucoside	Flavonoids	Flavones	C36H36O17	228770	52238.3	1.11305	0.00325885	0.010117	4.37935	2.13072	up
110	Kaempferol-3-O-(2''-O-acetyl)glucoside	Flavonoids	Flavonols	C23H22O12	6.99768e+06	611882	1.20053	0.00736989	0.0184034	11.4363	3.51555	up
111	Kaempferol-3-O-(2''-p-Coumaroyl)galactoside*	Flavonoids	Flavonols	C30H26O13	4.65104e+06	61890.3	1.20004	0.00374996	0.0109458	75.1497	6.2317	up
112	Kaempferol-3-O-(6''-O-acetyl)glucoside	Flavonoids	Flavonols	C23H22O12	2.71976e+07	5.34633e+06	1.20466	0.000933729	0.00461042	5.08715	2.34686	up
113	Kaempferol-3-O-(6''-Rhamnosyl-2''-Glucosyl)Glucoside (Camelliaside A)	Flavonoids	Flavonols	C33H40O20	97978.1	11554.3	1.11454	0.0729894	0.117217	8.47978	3.08403	up
114	Kaempferol-3-O-(6''-malonyl)galactoside*	Flavonoids	Flavonols	C24H22O14	6.77256e+07	6.91993e+06	1.1994	0.00717061	0.0181152	9.78703	3.29087	up
115	Kaempferol-3-O-(6''-malonyl)glucoside*	Flavonoids	Flavonols	C24H22O14	5.8434e+07	6.85822e+06	1.20255	0.00554976	0.0147994	8.52029	3.0909	up
116	Kaempferol-3-O-(6''-p-Coumaroyl)galactoside*	Flavonoids	Flavonols	C30H26O13	2.184e+06	258931	1.1794	0.060171	0.0992133	8.4347	3.07634	up
117	Kaempferol-3-O-(6''-p-Coumaroyl)glucoside (Tiliroside)*	Flavonoids	Flavonols	C30H26O13	2.184e+06	258931	1.1794	0.060171	0.0992133	8.4347	3.07634	up
118	Kaempferol-3-O-arabinoside (Juglanin)	Flavonoids	Flavonols	C20H18O10	7.49151e+06	915944	1.19673	0.0148319	0.0318775	8.17901	3.03193	up
119	Kaempferol-3-O-galactoside (Trifolin)*	Flavonoids	Flavonols	C21H20O11	550555	101675	1.20452	0.000775092	0.0041855	5.41488	2.43693	up
120	Kaempferol-3-O-galactoside-4'-O-glucoside	Flavonoids	Flavonols	C27H30O16	65101.8	8208.7	1.16353	0.0798764	0.126398	7.93083	2.98747	up
121	Kaempferol-3-O-glucorhamnoside*	Flavonoids	Flavonols	C27H30O15	6.23051e+07	1.48304e+07	1.19049	3.97299e-05	0.000715139	4.20116	2.07079	up
122	Kaempferol-3-O-glucoside (Astragalin)*	Flavonoids	Flavonols	C21H20O11	1.31842e+07	1.20484e+06	1.1753	0.0336825	0.0624499	10.9427	3.4519	up
123	Kaempferol-3-O-glucoside-7-O-rhamnoside*	Flavonoids	Flavonols	C27H30O15	6.35758e+07	1.37405e+07	1.19199	2.15699e-05	0.000567997	4.62689	2.21004	up
124	Kaempferol-3-O-glucuronide	Flavonoids	Flavonols	C21H18O12	340607	60778.6	1.20466	0.00119083	0.00515212	5.60406	2.48647	up
125	Kaempferol-3-O-neohesperidoside*	Flavonoids	Flavonols	C27H30O15	5.96959e+07	1.48379e+07	1.18584	0.00394517	0.0112868	4.02321	2.00835	up
126	Kaempferol-3-O-neohesperidoside-7-O-glucoside*	Flavonoids	Flavonols	C33H40O20	1.30447e+06	5310.74	1.19852	0.0498737	0.0861817	245.628	7.94033	up
127	Kaempferol-3-O-rhamnoside (Afzelin)(Kaempferin)	Flavonoids	Flavonols	C21H20O10	393957	72864.1	1.20494	1.50565e-05	0.000490406	5.40673	2.43476	up
128	Kaempferol-3-O-rutinoside(Nicotiflorin)*	Flavonoids	Flavonols	C27H30O15	5.66794e+07	1.58736e+07	1.15353	0.0358573	0.0656371	3.57066	1.83619	up
129	Kaempferol-3-O-rutinoside-7-O-glucoside	Flavonoids	Flavonols	C33H40O20	41915.5	19562	1.08274	0.0712478	0.115277	2.14271	1.09943	up
130	Kaempferol-3-O-sambubioside	Flavonoids	Flavonols	C26H28O15	85283.2	19167.7	1.14552	0.08327	0.129467	4.44931	2.15358	up
131	Kaempferol-3-O-sophoroside-7-O-rhamnoside*	Flavonoids	Flavonols	C33H40O20	1.30447e+06	5310.74	1.19852	0.0498737	0.0861817	245.628	7.94033	up
132	Kaempferol-3-O-sulfonate	Flavonoids	Flavonols	C15H10O9S	63892.6	165392	1.15097	0.00127539	0.00539005	0.38631	-1.37217	down
133	Kaempferol-3-O-xylosyl(1→2)glucoside	Flavonoids	Flavonols	C26H28O15	40004.2	7271.21	1.15448	0.0513072	0.0879553	5.50172	2.45988	up
134	Kaempferol-7-O-glucoside*	Flavonoids	Flavonols	C21H20O11	1.98774e+07	3.47396e+06	1.20382	0.000349287	0.0027702	5.72183	2.51648	up
135	Kaempferol-7-O-rhamnoside	Flavonoids	Flavonols	C21H20O10	434657	76579.1	1.19464	0.00136518	0.00551175	5.67593	2.50486	up
136	Kayaflavone*	Flavonoids	Biflavones	C33H24O10	1.28287e+06	596918	1.14738	0.0200581	0.0401163	2.14916	1.10377	up
137	Leucocyanidin	Flavonoids	Flavones	C15H14O7	47877.9	18036.8	1.17587	0.000506583	0.0031381	2.65445	1.40842	up
138	Leucocyanidin; 3,4,5,7,3',4'-Hexahydroxyflavan	Flavonoids	Flavanols	C15H14O7	725081	9386.36	1.2023	0.0127078	0.0280091	77.2483	6.27143	up
139	Limocitrin-3-O-glucoside*	Flavonoids	Flavonols	C23H24O13	96512.9	293214	1.14997	0.0512985	0.0879553	0.329155	-1.60316	down
140	Limocitrin-7-O-glucoside	Flavonoids	Flavonols	C23H24O13	422693	4.13751e+06	1.20296	0.000459017	0.0031381	0.102161	-3.29108	down
141	Luteolin (5,7,3',4'-Tetrahydroxyflavone)	Flavonoids	Flavones	C15H10O6	586059	50012.7	1.20486	1.94975e-05	0.000561529	11.7182	3.55068	up
142	Luteolin-3'-O-glucoside	Flavonoids	Flavones	C21H20O11	1.17182e+07	1.73552e+06	1.19919	0.0054791	0.014758	6.75196	2.75531	up
143	Luteolin-4'-O-glucoside*	Flavonoids	Flavones	C21H20O11	1.38191e+07	1.31062e+06	1.18005	0.0583086	0.097256	10.5439	3.39834	up
144	Luteolin-6,8-di-C-glucoside	Flavonoids	Flavones	C27H30O16	57676.9	298923	1.1887	0.0133217	0.029213	0.192949	-2.37371	down
145	Luteolin-6-C-arabinoside-7-O-glucoside	Flavonoids	Flavones	C26H28O15	10377.4	77413.2	1.17241	0.0473934	0.0832274	0.134053	-2.89913	down
146	Luteolin-7-O-(6''-malonyl)glucoside*	Flavonoids	Flavones	C24H22O14	3.00524e+06	302451	1.2011	0.00814151	0.0199837	9.9363	3.31271	up
147	Luteolin-7-O-(6''-malonyl)glucoside-5-O-rhamnoside	Flavonoids	Flavones	C30H32O18	316086	99288.7	1.11964	0.00258378	0.00867178	3.1835	1.67062	up
148	Luteolin-7-O-glucoside (Cynaroside)*	Flavonoids	Flavones	C21H20O11	1.26601e+07	1.7858e+06	1.18736	0.0264416	0.0503206	7.08928	2.82564	up
149	Luteolin-7-O-glucuronide-(2→1)-glucuronide	Flavonoids	Flavones	C27H26O18	27361.2	3338.33	1.08986	0.1542	0.21628	8.19608	3.03493	up
150	Luteolin-7-O-rutinoside*	Flavonoids	Flavones	C27H30O15	6.23051e+07	1.48304e+07	1.19049	3.97299e-05	0.000715139	4.20116	2.07079	up
151	Malonyl isoSakuranin	Flavonoids	Flavanones	C25H26O13	5.97794e+07	6.01064e+06	1.20287	0.00514943	0.0141691	9.9456	3.31406	up
152	Malvidin-3-O-galactoside (Primulin)*	Flavonoids	Anthocyanidins	C23H25O12+	316089	2.22392e+06	1.18995	0.00547507	0.014758	0.142131	-2.8147	down
153	Malvidin-3-O-glucoside (Oenin)*	Flavonoids	Anthocyanidins	C23H25O12+	316089	2.22392e+06	1.18995	0.00547507	0.014758	0.142131	-2.8147	down
154	Methylhesperidin	Flavonoids	Flavanones	C29H36O15	22917.9	5861.57	1.04193	0.0993119	0.149487	3.90985	1.96712	up
155	Morin	Flavonoids	Flavonols	C15H10O7	6.92948e+06	507328	1.16769	0.000102108	0.00112611	13.6588	3.77176	up
156	Morin-3-O-arabinoside	Flavonoids	Flavonols	C20H18O11	1.31148e+06	607227	1.19428	0.0067389	0.0173286	2.15979	1.11089	up
157	Morin-3-O-xyloside*	Flavonoids	Flavonols	C20H18O11	2.81953e+07	1.10412e+07	1.10607	0.026256	0.0501885	2.55364	1.35255	up
158	Myricetin	Flavonoids	Flavonols	C15H10O8	66159.9	22082.7	1.08441	0.00728398	0.0182946	2.99601	1.58304	up
159	Myricetin 3-(2''-p-Hydroxybenzoylrhamnoside)	Flavonoids	Flavonols	C28H24O14	28523.7	8722.98	1.01752	0.0113536	0.0258145	3.26994	1.70927	up
160	Myricetin-3,7,3'-trimethyl ether	Flavonoids	Flavonols	C18H16O8	1.37538e+07	5.20839e+06	1.20087	9.44747e-05	0.00107403	2.64069	1.40092	up
161	Myricetin-3-O-galactoside*	Flavonoids	Flavonols	C21H20O13	1.29651e+06	1.17433e+07	1.20334	0.00197501	0.00713847	0.110404	-3.17914	down
162	Myricetin-3-O-galactoside-3'-O-rhamnoside	Flavonoids	Flavonols	C27H30O17	106892	10450.4	1.20158	0.00550008	0.014758	10.2285	3.35453	up
163	Myricetin-3-O-glucoside*	Flavonoids	Flavonols	C21H20O13	1.23991e+06	1.5573e+07	1.19522	0.0228494	0.0450727	0.0796194	-3.65074	down
164	Naringenin (5,7,4'-Trihydroxyflavanone)*	Flavonoids	Flavanones	C15H12O5	272612	83324.7	1.1955	0.00135352	0.00551175	3.27169	1.71004	up
165	Naringenin chalcone; 2',4,4',6'-Tetrahydroxychalcone*	Flavonoids	Chalcones	C15H12O5	908028	45117.9	1.19528	4.92533e-07	7.09247e-05	20.1257	4.33097	up
166	Naringenin-4'-O-glucoside	Flavonoids	Flavanones	C21H22O10	612495	77953	1.18862	0.00072641	0.00407544	7.85724	2.97402	up
167	Naringenin-7-O-glucoside (Prunin)	Flavonoids	Flavanones	C21H22O10	882908	390037	1.20207	2.83592e-05	0.000610954	2.26365	1.17865	up
168	Neosakuranin	Flavonoids	Flavanones	C22H24O10	2.51568e+07	3.58526e+06	1.18333	0.0482862	0.0841114	7.01672	2.8108	up
169	Nepetin (5,7,3',4'-Tetrahydroxy-6-methoxyflavone)	Flavonoids	Flavones	C16H12O7	114318	15838.7	1.19264	0.00905873	0.021741	7.21766	2.85153	up
170	Nepetin-7-O-alloside*	Flavonoids	Flavones	C22H22O12	6.59719e+06	1.48755e+06	1.16159	0.00111138	0.00494965	4.43492	2.14891	up
171	Nepetin-7-O-glucoside(Nepitrin)*	Flavonoids	Flavones	C22H22O12	1.52454e+06	3.64484e+06	1.13906	0.00422615	0.0120112	0.418274	-1.25748	down
172	Orientin-2''-O-rhamnoside	Flavonoids	Flavones	C27H30O15	1.86392e+07	27654.5	1.20433	0.00393517	0.0112868	674.002	9.39661	up
173	Pelargonidin-3,5-O-diglucoside	Flavonoids	Anthocyanidins	C27H31O15+	890877	18478.3	1.16814	0.000804366	0.00426271	48.212	5.59132	up
174	Pelargonidin-3-O-(6''-O-malonyl)glucoside	Flavonoids	Anthocyanidins	C24H23O13+	205504	8412.48	1.12732	0.0123456	0.0275401	24.4285	4.61049	up
175	Pelargonidin-3-O-glucoside	Flavonoids	Anthocyanidins	C21H21O10+	7.65616e+07	290481	1.20504	5.41207e-05	0.000802478	263.569	8.04204	up
176	Pelargonidin-3-O-rutinoside	Flavonoids	Anthocyanidins	C27H31O14+	2.88611e+07	48769.9	1.20273	2.36665e-05	0.000567997	591.78	9.20892	up
177	Peonidin-3,5-O-diglucoside	Flavonoids	Anthocyanidins	C28H33O16+	161943	4631.18	1.20189	0.0027819	0.00903594	34.968	5.12796	up
178	Peonidin-3-O-arabinoside	Flavonoids	Anthocyanidins	C21H21O10+	1.4504e+06	18327.2	1.19897	0.00202771	0.0071866	79.1391	6.30632	up
179	Peonidin-3-O-glucoside	Flavonoids	Anthocyanidins	C22H23O11+	7.80434e+07	7.85846e+06	1.20413	2.81907e-06	0.000202973	9.93112	3.31196	up
180	Peonidin-3-O-rutinoside	Flavonoids	Anthocyanidins	C28H33O15+	5.60453e+07	57269.5	1.19975	0.000270526	0.00231352	978.624	9.93461	up
181	Persicoside	Flavonoids	Flavanones	C23H26O11	2.23118e+06	147782	1.19883	2.92294e-07	6.31354e-05	15.0977	3.91626	up
182	Phloretin	Flavonoids	Chalcones	C15H14O5	1.89344e+06	2358.12	1.20415	0.000385895	0.00292468	802.944	9.64916	up
183	Phloretin-2'-O-(6''-O-xylosyl)glucoside	Flavonoids	Chalcones	C26H32O14	308309	58071.9	1.20423	0.00115408	0.00508738	5.30909	2.40846	up
184	Phloretin-2'-O-glucoside (Phlorizin)	Flavonoids	Chalcones	C21H24O10	1.79986e+06	117613	1.20505	0.00020149	0.00202427	15.3032	3.93576	up
185	Phloretin-4'-O-glucoside (Trilobatin)*	Flavonoids	Chalcones	C21H24O10	2.48604e+06	212279	1.20498	0.000627318	0.00361335	11.7111	3.54981	up
186	Poncirin (Isosakuranetin-7-O-neohesperidoside)*	Flavonoids	Flavanones	C28H34O14	4.63049e+07	7.89747e+06	1.203	0.00168618	0.00624331	5.86326	2.5517	up
187	Procyanidin B1	Tannins	Proanthocyanidins	C30H26O12	170948	5319.19	1.19435	0.00577738	0.0153118	32.1379	5.0062	up
188	Procyanidin B2	Tannins	Proanthocyanidins	C30H26O12	1.11367e+06	42466.1	1.20322	0.00203694	0.0071866	26.2248	4.71286	up
189	Procyanidin B3	Tannins	Proanthocyanidins	C30H26O12	4.86445e+06	7226.45	1.20328	0.00214058	0.00739785	673.144	9.39477	up
190	Procyanidin B4	Tannins	Proanthocyanidins	C30H26O12	320216	5553.05	1.18004	0.00802139	0.0198014	57.665	5.84962	up
191	Procyanidin B5	Tannins	Proanthocyanidins	C30H26O12	138203	3660.35	1.15465	2.96991e-05	0.000610954	37.7567	5.23866	up
192	Procyanidin C2	Tannins	Proanthocyanidins	C45H38O18	89569.4	1404.19	1.19473	0.00363589	0.0107583	63.7873	5.9952	up
193	Quercetagetin-7-O-glucoside(Quercetagitrin)*	Flavonoids	Flavonols	C21H20O13	1.23062e+06	1.15126e+07	1.20253	0.00266957	0.00887119	0.106894	-3.22575	down
194	Quercetin	Flavonoids	Flavonols	C15H10O7	2.55869e+06	709762	1.14027	0.00161151	0.00610677	3.60499	1.85	up
195	Quercetin-3,7-Di-O-glucoside*	Flavonoids	Flavonols	C27H30O17	30972.4	224985	1.1129	0.00135221	0.00551175	0.137664	-2.86078	down
196	Quercetin-3-O-(2''-O-acetyl)glucuronide	Flavonoids	Flavonols	C23H20O14	46917.5	20317.8	1.19262	8.78104e-05	0.00105372	2.30918	1.20738	up
197	Quercetin-3-O-(2''-O-malonyl)glucoside-7-O-arabinoside	Flavonoids	Flavonols	C29H30O19	80898.3	6671.67	1.1358	0.107235	0.159743	12.1256	3.59999	up
198	Quercetin-3-O-(2''-O-rhamnosyl)galactoside*	Flavonoids	Flavonols	C27H30O16	4.18319e+06	148503	1.18683	0.0833147	0.129467	28.1691	4.81604	up
199	Quercetin-3-O-(4''-glucosyl)glucoside; Meratin*	Flavonoids	Flavonols	C27H30O17	35852.3	211908	1.19616	0.00979916	0.0232596	0.169188	-2.5633	down
200	Quercetin-3-O-(6''-O-acetyl)galactoside	Flavonoids	Flavonols	C23H22O13	1.34167e+06	424157	1.04964	0.10973	0.16234	3.16314	1.66136	up
201	Quercetin-3-O-(6''-O-acetyl)glucoside	Flavonoids	Flavonols	C23H22O13	2.42163e+07	1.58946e+06	1.20014	0.00653783	0.0169122	15.2356	3.92937	up
202	Quercetin-3-O-(6''-O-arabinosyl)glucoside*	Flavonoids	Flavonols	C26H28O16	1.75763e+06	457941	1.15746	0.0553726	0.0938077	3.83811	1.9404	up
203	Quercetin-3-O-(6''-O-galloyl)galactoside	Flavonoids	Flavonols	C28H24O16	4055.5	11431.8	1.00338	0.0118425	0.0267851	0.354757	-1.4951	down
204	Quercetin-3-O-(6''-O-p-Coumaroyl)galactoside	Flavonoids	Flavonols	C30H26O14	4.4244e+06	868450	1.15794	0.0248882	0.0482138	5.09459	2.34897	up
205	Quercetin-3-O-(6''-O-p-Coumaroyl)glucoside	Flavonoids	Flavonols	C30H26O14	4.49314e+06	904061	1.19718	6.47312e-05	0.000847391	4.96995	2.31323	up
206	Quercetin-3-O-Sulfonate	Flavonoids	Flavonols	C15H10O10S	249788	60711	1.20464	0.000527013	0.00316782	4.11438	2.04067	up
207	Quercetin-3-O-apiosyl(1→2)galactoside*	Flavonoids	Flavonols	C26H28O16	1.62645e+06	441663	1.1717	0.000221318	0.00212466	3.68257	1.88071	up
208	Quercetin-3-O-arabinoside	Flavonoids	Flavonols	C20H18O11	1.41892e+06	627040	1.20188	0.00157483	0.0060206	2.26289	1.17817	up
209	Quercetin-3-O-galactoside (Hyperin)*	Flavonoids	Flavonols	C21H20O12	2.35367e+07	2.39021e+06	1.15304	0.10365	0.154965	9.84711	3.2997	up
210	Quercetin-3-O-glucoside (Isoquercitrin)*	Flavonoids	Flavonols	C21H20O12	1.91596e+07	2.18212e+06	1.17603	0.00385121	0.0111659	8.78023	3.13426	up
211	Quercetin-3-O-glucuronide	Flavonoids	Flavonols	C21H18O13	96660.3	20944.3	1.11069	0.00154177	0.00594847	4.61512	2.20637	up
212	Quercetin-3-O-rhamnoside(Quercitrin)	Flavonoids	Flavonols	C21H20O11	9.75058e+06	749231	1.20212	0.00085699	0.00444562	13.0141	3.702	up
213	Quercetin-3-O-sambubioside*	Flavonoids	Flavonols	C26H28O16	1.54235e+06	351222	1.17138	0.011154	0.0254949	4.39137	2.13467	up
214	Quercetin-3-O-α-rhamnosyl (1→2)-[α-rhamnosyl (1→6)]-β-glucoside	Flavonoids	Flavonols	C33H40O20	2854.43	24419.5	1.15726	0.038506	0.0698932	0.116892	-3.09676	down
215	Quercetin-4'-O-glucoside (Spiraeoside)	Flavonoids	Flavonols	C21H20O12	4.65647e+06	1.007e+06	1.20436	1.34752e-07	5.82128e-05	4.62409	2.20917	up
216	Quercetin-4'-O-glucuronide*	Flavonoids	Flavonols	C21H18O13	1.97622e+06	641759	1.13315	0.084887	0.13102	3.07938	1.62264	up
217	Quercetin-5,4'-di-O-glucoside	Flavonoids	Flavonols	C27H30O17	62535	20536.5	1.18412	0.000454746	0.0031381	3.04506	1.60647	up
218	Quercetin-5-O-β-D-glucoside*	Flavonoids	Flavonols	C21H20O12	1.86989e+07	2.39716e+06	1.14768	0.0173808	0.0357487	7.80044	2.96356	up
219	Quercetin-7-O-(2''-malonyl)glucosyl-5-O-glucoside	Flavonoids	Flavonols	C30H32O20	127916	10641.5	1.16939	0.010527	0.024582	12.0205	3.58743	up
220	Quercetin-7-O-(6''-malonyl)glucoside	Flavonoids	Flavonols	C24H22O15	2.18398e+06	519845	1.189	0.000156851	0.00165267	4.20121	2.07081	up
221	Quercetin-7-O-glucoside	Flavonoids	Flavonols	C21H20O12	4.10025e+06	950428	1.16227	0.0475934	0.0832403	4.3141	2.10906	up
222	Rhamnetin-3-O-Rutinoside*	Flavonoids	Flavonols	C28H32O16	519815	3.12538e+06	1.16558	0.0393286	0.0707915	0.166321	-2.58796	down
223	Swertiajaponin	Flavonoids	Flavones	C22H22O11	308144	19838.5	1.18888	0.00250458	0.00858714	15.5327	3.95723	up
224	Tamarixetin-3-O-(6''-malonyl)glucoside*	Flavonoids	Flavonols	C25H24O15	1.74606e+06	321661	1.19471	0.0138167	0.0301455	5.42827	2.44049	up
225	Tamarixetin-3-O-rutinoside	Flavonoids	Flavonols	C28H32O16	2.51084e+06	1.49265e+07	1.11237	0.00272228	0.00895884	0.168213	-2.57164	down
226	Taxifolin(Dihydroquercetin)	Flavonoids	Flavanonols	C15H12O7	907470	70050.3	1.20407	0.00294929	0.00943415	12.9546	3.69539	up
227	Taxifolin-2-O-glucoside	Flavonoids	Flavanonols	C21H22O12	4.17685e+06	102841	1.20498	4.44449e-05	0.000740353	40.6145	5.34392	up
228	Taxifolin-3-O-rhamnoside (Astilbin)	Flavonoids	Flavanonols	C21H22O11	44840	17766.8	1.17744	0.00198291	0.00713847	2.52381	1.3356	up
229	Tricetin 3'-glucuronide*	Flavonoids	Flavones	C21H18O13	2.05399e+06	650488	1.1542	0.0620572	0.101548	3.15761	1.65884	up
230	Tricetin-5-O-(6''-malonyl)glucoside	Flavonoids	Flavones	C24H22O15	3.00209e+06	587511	1.19626	4.70698e-05	0.000746421	5.10985	2.35328	up
231	Tricin-4'-O-glucoside*	Flavonoids	Flavones	C23H24O12	393172	7.538e+06	1.20424	0.00204619	0.0071866	0.0521586	-4.26095	down
232	Tricin-4'-O-glycerol	Flavonoids	Flavones	C20H20O9	28591.8	13471.1	1.16816	0.00346404	0.0103359	2.12245	1.08573	up
233	Tricin-4'-O-syringic acid	Flavonoids	Flavones	C26H22O11	8569.51	76682.4	1.19542	2.27569e-05	0.000567997	0.111753	-3.16161	down
234	Troxerutin	Flavonoids	Flavones	C33H42O19	957239	129297	1.18886	0.026673	0.0505384	7.40343	2.88819	up
235	Vicenin-2,6''-O-Glucoside	Flavonoids	Flavones	C33H40O20	41274.8	179732	1.16793	0.0413078	0.0734361	0.229647	-2.12251	down
236	Vitexin-2''-O-galactoside	Flavonoids	Flavones	C27H30O15	1.85038e+06	742825	1.09609	0.00939818	0.022431	2.491	1.31673	up
237	catechin-3-O-α-L-rhamnopyranoside	Flavonoids	Flavanols	C21H24O10	22959.2	3050.35	1.10287	0.0727728	0.117217	7.52674	2.91202	up
238	catechin-4-β-D-galactopyranoside*	Flavonoids	Flavanols	C21H24O11	3.73726e+06	60458.6	1.20318	0.00129489	0.00539005	61.8152	5.94989	up
