# Supplementary material for: Integrated Metabolome and Transcriptome Analyses Reveal That the Flavonoid Metabolic Pathway Is Associated with Pigment Differential Accumulation in Two Colors of Petaloid Staminodes in Canna glauca
Source: MDPI journal article supplement (doi:10.3390/horticulturae10040372), 2024-04-07
Supplement: s1 [file s1 › Supplementary Table S5.xlsx]

## Sheet: Sheet1
Supplementary Table S5 The DEGs enriched in the KEGG pathway pertaining to flavonoid biosynthesis in CgpsP vs CgpsY
KEGG number	Pathway description	No.All DEGs	No.Up DEGs	No.Down DEGs
ko00940	Phenylpropanoid biosynthesis	75	44	31
ko00941	Flavonoid biosynthesis	17	11	6
ko00942	Anthocyanin biosynthesis	3	2	1
ko00944	Flavone and flavonol biosynthesis	4	2	2
