# Supplementary material for: Integrated Metabolome and Transcriptome Analyses Reveal That the Flavonoid Metabolic Pathway Is Associated with Pigment Differential Accumulation in Two Colors of Petaloid Staminodes in Canna glauca
Source: MDPI journal article supplement (doi:10.3390/horticulturae10040372), 2024-04-07
Supplement: s1 [file s1 › Supplementary Table S6.xlsx]

## Sheet: Sheet1
Supplementary Table S6 Differentially expressed TFs related to the biosynthesis of flavonoid metabolites (only presented |log2FC| greater than 4.0 )
ID	CgpsY-fpkm	CgpsP-fpkm	log2FoldChange	|log2FC|	regulated	TF-Family
Cluster-12778.1	0.233333	0.00333333	-5.77311	5.77311	down	MADS-M-type
Cluster-14440.1	0.0433333	14.3733	8.68239	8.68239	up	AP2/ERF-ERF
Cluster-14550.1	5.12333	0	-8.89472	8.89472	down	bHLH
Cluster-15325.1	0.0933333	66.8567	9.74878	9.74878	up	MYB
Cluster-15828.0	1.76333	0	-7.09023	7.09023	down	AP2/ERF-ERF
Cluster-15828.2	18.8967	0	-10.0814	10.0814	down	AP2/ERF-ERF
Cluster-18746.0	5.38667	0.01	-8.82878	8.82878	down	AP2/ERF-ERF
Cluster-20873.1	0.186667	62.62	8.72821	8.72821	up	MYB
Cluster-21148.0	7.81667	0	-8.92582	8.92582	down	AP2/ERF-ERF
Cluster-21409.0	0.0933333	2.16	4.75133	4.75133	up	WRKY
Cluster-21798.9	0	36.5867	11.919	11.919	up	AP2/ERF-ERF
Cluster-24491.0	1.42333	0.0666667	-4.15737	4.15737	down	bHLH
Cluster-24508.1	0.00333333	1.10667	7.01311	7.01311	up	MADS-MIKC
Cluster-26416.0	0	2.48	7.17319	7.17319	up	AP2/ERF-ERF
Cluster-27395.4	8.49	0	-10.6374	10.6374	down	bHLH
Cluster-29049.1	0	3.58333	10.1156	10.1156	up	bHLH
Cluster-29594.3	0.78	20.6133	5.02158	5.02158	up	AP2/ERF-ERF
Cluster-30186.1	0.04	1.73	5.74185	5.74185	up	bHLH
Cluster-30255.3	1.25667	0.0466667	-4.52476	4.52476	down	MYB
Cluster-32439.0	0	8.17667	11.6812	11.6812	up	AP2/ERF-ERF
Cluster-32439.4	0	2.79333	10.6319	10.6319	up	AP2/ERF-ERF
Cluster-32439.5	1.61667	0	-9.31565	9.31565	down	AP2/ERF-ERF
Cluster-32439.7	0.03	0.983333	5.81212	5.81212	up	AP2/ERF-ERF
Cluster-32582.1	0.06	1.92667	5.33183	5.33183	up	MYB
Cluster-32590.0	4.38667	0	-8.96004	8.96004	down	bHLH
Cluster-32874.0	3.52333	65.2933	4.47703	4.47703	up	MYB
Cluster-33031.12	7.94333	0	-10.968	10.968	down	bHLH
Cluster-33031.16	30.4533	0.14	-7.52123	7.52123	down	bHLH
Cluster-33369.1	0.07	66.4467	10.142	10.142	up	MYB
Cluster-33378.2	0	4.24	9.98579	9.98579	up	WRKY
Cluster-34052.4	1.81667	41.2533	4.48794	4.48794	up	WRKY
Cluster-34235.2	0.133333	4.36	5.35716	5.35716	up	MYB
Cluster-34235.4	6.36333	0	-9.27317	9.27317	down	MYB
Cluster-34277.0	0.666667	0	-9.08978	9.08978	down	AP2/ERF-ERF
Cluster-34277.2	0	1.12667	10.3758	10.3758	up	AP2/ERF-ERF
Cluster-34277.5	0.603333	0	-7.79646	7.79646	down	AP2/ERF-ERF
Cluster-34541.6	17.92	0.04	-8.62135	8.62135	down	WRKY
Cluster-34590.2	0.03	1.09333	5.4249	5.4249	up	NAC
Cluster-34590.3	0	0.496667	9.71322	9.71322	up	NAC
Cluster-34590.5	0	3.05667	12.0898	12.0898	up	NAC
Cluster-34590.6	0	0.276667	8.835	8.835	up	NAC
Cluster-34635.3	0	1.72	9.34565	9.34565	up	NAC
Cluster-35316.2	1.71333	0.01	-7.6008	7.6008	down	MADS-M-type
Cluster-35401.0	6.53333	0.09	-5.96902	5.96902	down	AP2/ERF-ERF
Cluster-35401.2	15.4467	0.05	-8.0738	8.0738	down	AP2/ERF-ERF
Cluster-36149.0	0.143333	4.80667	5.32771	5.32771	up	NAC
Cluster-37394.3	0	4.79	11.7849	11.7849	up	NAC
Cluster-37394.4	0.0466667	3.65667	6.62129	6.62129	up	NAC
Cluster-37623.4	0	1.81333	9.20314	9.20314	up	AP2/ERF-ERF
Cluster-37623.5	3.97	0	-9.79321	9.79321	down	AP2/ERF-ERF
Cluster-37623.6	5.92667	0	-9.94937	9.94937	down	AP2/ERF-ERF
Cluster-37623.7	0	4.97667	10.2053	10.2053	up	AP2/ERF-ERF
Cluster-5309.0	11.28	0.416667	-4.54951	4.54951	down	AP2/ERF-ERF

## Sheet: 热图
ID	CgpsY	CgpsP
Cluster-12778.1	0.233333	0.00333333
Cluster-14440.1	0.0433333	14.3733
Cluster-14550.1	5.12333	0
Cluster-15325.1	0.0933333	66.8567
Cluster-15828.0	1.76333	0
Cluster-15828.2	18.8967	0
Cluster-18746.0	5.38667	0.01
Cluster-20873.1	0.186667	62.62
Cluster-21148.0	7.81667	0
Cluster-21409.0	0.0933333	2.16
Cluster-21798.9	0	36.5867
Cluster-24491.0	1.42333	0.0666667
Cluster-24508.1	0.00333333	1.10667
Cluster-26416.0	0	2.48
Cluster-27395.4	8.49	0
Cluster-29049.1	0	3.58333
Cluster-29594.3	0.78	20.6133
Cluster-30186.1	0.04	1.73
Cluster-30255.3	1.25667	0.0466667
Cluster-32439.0	0	8.17667
Cluster-32439.4	0	2.79333
Cluster-32439.5	1.61667	0
Cluster-32439.7	0.03	0.983333
Cluster-32582.1	0.06	1.92667
Cluster-32590.0	4.38667	0
Cluster-32874.0	3.52333	65.2933
Cluster-33031.12	7.94333	0
Cluster-33031.16	30.4533	0.14
Cluster-33369.1	0.07	66.4467
Cluster-33378.2	0	4.24
Cluster-34052.4	1.81667	41.2533
Cluster-34235.2	0.133333	4.36
Cluster-34235.4	6.36333	0
Cluster-34277.0	0.666667	0
Cluster-34277.2	0	1.12667
Cluster-34277.5	0.603333	0
Cluster-34541.6	17.92	0.04
Cluster-34590.2	0.03	1.09333
Cluster-34590.3	0	0.496667
Cluster-34590.5	0	3.05667
Cluster-34590.6	0	0.276667
Cluster-34635.3	0	1.72
Cluster-35316.2	1.71333	0.01
Cluster-35401.0	6.53333	0.09
Cluster-35401.2	15.4467	0.05
Cluster-36149.0	0.143333	4.80667
Cluster-37394.3	0	4.79
Cluster-37394.4	0.0466667	3.65667
Cluster-37623.4	0	1.81333
Cluster-37623.5	3.97	0
Cluster-37623.6	5.92667	0
Cluster-37623.7	0	4.97667
Cluster-05309.0	11.28	0.416667

## Sheet: 分组
Regulation	down	Cluster-12778.1
Regulation	up	Cluster-14440.1
Regulation	down	Cluster-14550.1
Regulation	up	Cluster-15325.1
Regulation	down	Cluster-15828.0
Regulation	down	Cluster-15828.2
Regulation	down	Cluster-18746.0
Regulation	up	Cluster-20873.1
Regulation	down	Cluster-21148.0
Regulation	up	Cluster-21409.0
Regulation	up	Cluster-21798.9
Regulation	down	Cluster-24491.0
Regulation	up	Cluster-24508.1
Regulation	up	Cluster-26416.0
Regulation	down	Cluster-27395.4
Regulation	up	Cluster-29049.1
Regulation	up	Cluster-29594.3
Regulation	up	Cluster-30186.1
Regulation	down	Cluster-30255.3
Regulation	up	Cluster-32439.0
Regulation	up	Cluster-32439.4
Regulation	down	Cluster-32439.5
Regulation	up	Cluster-32439.7
Regulation	up	Cluster-32582.1
Regulation	down	Cluster-32590.0
Regulation	up	Cluster-32874.0
Regulation	down	Cluster-33031.12
Regulation	down	Cluster-33031.16
Regulation	up	Cluster-33369.1
Regulation	up	Cluster-33378.2
Regulation	up	Cluster-34052.4
Regulation	up	Cluster-34235.2
Regulation	down	Cluster-34235.4
Regulation	down	Cluster-34277.0
Regulation	up	Cluster-34277.2
Regulation	down	Cluster-34277.5
Regulation	down	Cluster-34541.6
Regulation	up	Cluster-34590.2
Regulation	up	Cluster-34590.3
Regulation	up	Cluster-34590.5
Regulation	up	Cluster-34590.6
Regulation	up	Cluster-34635.3
Regulation	down	Cluster-35316.2
Regulation	down	Cluster-35401.0
Regulation	down	Cluster-35401.2
Regulation	up	Cluster-36149.0
Regulation	up	Cluster-37394.3
Regulation	up	Cluster-37394.4
Regulation	up	Cluster-37623.4
Regulation	down	Cluster-37623.5
Regulation	down	Cluster-37623.6
Regulation	up	Cluster-37623.7
Regulation	down	Cluster-05309.0
TF-Family	MADS-M-type	Cluster-12778.1
TF-Family	AP2/ERF-ERF	Cluster-14440.1
TF-Family	bHLH	Cluster-14550.1
TF-Family	MYB	Cluster-15325.1
TF-Family	AP2/ERF-ERF	Cluster-15828.0
TF-Family	AP2/ERF-ERF	Cluster-15828.2
TF-Family	AP2/ERF-ERF	Cluster-18746.0
TF-Family	MYB	Cluster-20873.1
TF-Family	AP2/ERF-ERF	Cluster-21148.0
TF-Family	WRKY	Cluster-21409.0
TF-Family	AP2/ERF-ERF	Cluster-21798.9
TF-Family	bHLH	Cluster-24491.0
TF-Family	MADS-MIKC	Cluster-24508.1
TF-Family	AP2/ERF-ERF	Cluster-26416.0
TF-Family	bHLH	Cluster-27395.4
TF-Family	bHLH	Cluster-29049.1
TF-Family	AP2/ERF-ERF	Cluster-29594.3
TF-Family	bHLH	Cluster-30186.1
TF-Family	MYB	Cluster-30255.3
TF-Family	AP2/ERF-ERF	Cluster-32439.0
TF-Family	AP2/ERF-ERF	Cluster-32439.4
TF-Family	AP2/ERF-ERF	Cluster-32439.5
TF-Family	AP2/ERF-ERF	Cluster-32439.7
TF-Family	MYB	Cluster-32582.1
TF-Family	bHLH	Cluster-32590.0
TF-Family	MYB	Cluster-32874.0
TF-Family	bHLH	Cluster-33031.12
TF-Family	bHLH	Cluster-33031.16
TF-Family	MYB	Cluster-33369.1
TF-Family	WRKY	Cluster-33378.2
TF-Family	WRKY	Cluster-34052.4
TF-Family	MYB	Cluster-34235.2
TF-Family	MYB	Cluster-34235.4
TF-Family	AP2/ERF-ERF	Cluster-34277.0
TF-Family	AP2/ERF-ERF	Cluster-34277.2
TF-Family	AP2/ERF-ERF	Cluster-34277.5
TF-Family	WRKY	Cluster-34541.6
TF-Family	NAC	Cluster-34590.2
TF-Family	NAC	Cluster-34590.3
TF-Family	NAC	Cluster-34590.5
TF-Family	NAC	Cluster-34590.6
TF-Family	NAC	Cluster-34635.3
TF-Family	MADS-M-type	Cluster-35316.2
TF-Family	AP2/ERF-ERF	Cluster-35401.0
TF-Family	AP2/ERF-ERF	Cluster-35401.2
TF-Family	NAC	Cluster-36149.0
TF-Family	NAC	Cluster-37394.3
TF-Family	NAC	Cluster-37394.4
TF-Family	AP2/ERF-ERF	Cluster-37623.4
TF-Family	AP2/ERF-ERF	Cluster-37623.5
TF-Family	AP2/ERF-ERF	Cluster-37623.6
TF-Family	AP2/ERF-ERF	Cluster-37623.7
TF-Family	AP2/ERF-ERF	Cluster-05309.0
