# Supplementary material for: Integrated Metabolome and Transcriptome Analyses Reveal That the Flavonoid Metabolic Pathway Is Associated with Pigment Differential Accumulation in Two Colors of Petaloid Staminodes in Canna glauca
Source: MDPI journal article supplement (doi:10.3390/horticulturae10040372), 2024-04-07
Supplement: s1 [file s1 › Supplementary Table S7.xlsx]

## Sheet: Sheet1
Gene Name	Gene ID	CgpsY-1_fpkm	CgpsY-2_fpkm	CgpsY-3_fpkm	CgpsY	CgpsP-1_fpkm	CgpsP-2_fpkm	CgpsP-3_fpkm	CgpsP	Length	NR	Regulation	备注
PAL	Cluster-8955.0	0.32	0.39	0.32	0.343333	0.58	0.8	0.57	0.65	873	phenylalanine ammonia lyase 2, partial [Rhaphiolepis bibas]	up
4CL	Cluster-20040.0	9.4	10.12	10.49	10.0033	12.17	14.63	13.28	13.36	2241	PREDICTED: 4-coumarate--CoA ligase 1-like [Musa acuminata subsp. malaccensis]	up	可能是，匹配度不高
	Cluster-14320	11.59	10.44	12.15	11.3933	6.16	8.2	8.56	7.64	1995	4-coumarate-coa ligase [Musa troglodytarum]	down	可能是，匹配度不高
C4H	Cluster-19355.0	0.1	0.51	0.42	0.343333	0.22	0.32	0.31	0.283333	747	cinnamate-4-hydroxylase [Rubus sp. SSL-2007]	无变化
	Cluster-32574.0	2.39	3.45	3.07	2.97	1.19	1.64	0.48	1.10333	993	cinnamate 4-hydroxylase, partial [Musa acuminata AAA Group]	down
	Cluster-32574.1	0.63	0	0.2	0.276667	1.5	1.81	1.64	1.65	759	cinnamate 4-hydroxylase, partial [Musa acuminata AAA Group]	up
CHS	Cluster-17340.0	197.22	205.07	203.63	201.973	114.25	121.37	118.98	118.2	1361	chalcone synthase 2 [Elaeis guineensis]	down
	Cluster-17340.1	6.12	3.88	5.36	5.12	2.6	2.88	1.02	2.16667	1435	chalcone synthase 2 [Elaeis guineensis]	down	Flavonoid biosynthesis
	Cluster-17340.2	764.88	787.67	802.46	785.003	3062.65	3246.54	3236.46	3181.88	1382	hypothetical protein MUK42_14990 [Musa troglodytarum]	up	Flavonoid biosynthesis
	Cluster-4150.0	0.6	0.51	0.37	0.493333	0.39	0.75	0.23	0.456667	911	chalcone synthase-like [Vitis riparia]	无变化
CHI	Cluster-19019.0	48.77	50.94	50.48	50.0633	38.01	37.36	35.03	36.8	2624	Chalcone isomerase protein [Dioscorea alata]	down
	Cluster-26459.0	971.8	998.37	990.02	986.73	948.9	991.06	990.29	976.75	836	chalcone isomerase [Canna x generalis]	无变化
	Cluster-26459.1	14.33	13.87	13.42	13.8733	7.28	6.9	5.54	6.57333	1261	RecName: Full=Chalcone--flavanone isomerase; Short=Chalcone isomerase [Canna x generalis]	down
F3H	Cluster-12247.0	0.15	0.3	0.62	0.356667	0.64	0.31	0.57	0.506667	1172	naringenin,2-oxoglutarate 3-dioxygenase [Quercus suber]	up	不是差异基因
F3'H	Cluster-16437.0	10.28	10.27	11.2	10.5833	160.29	169.13	162.28	163.9	1638	Naringenin,2-oxoglutarate 3-dioxygenase [Musa troglodytarum]	up
DFR	Cluster-20066.0	3.27	3.5	3.78	3.51667	65.57	66.62	69.89	67.36	1453	PREDICTED: dihydroflavonol-4-reductase [Musa acuminata subsp. malaccensis]	up	可能是，匹配度不高
ANS	Cluster-30952.0	0.27	0.39	0.27	0.31	0.55	0.54	0.27	0.453333	657	anthocyanidin synthase [Liquidambar formosana]	up
GT	Cluster-36254.0	0.92	1.6	0.97	1.16333	0	0.24	0.1	0.113333	7594	anthocyanidin 5,3-O-glucosyltransferase-like [Zingiber officinale]
	Cluster-36254.1	0.19	0.17	0.04	0.133333	0.57	0.4	0.58	0.516667	6196	anthocyanidin 5,3-O-glucosyltransferase-like [Zingiber officinale]
	Cluster-36254.2	3.54	3.5	2.17	3.07	0	0	0	0	7474	anthocyanidin 5,3-O-glucosyltransferase-like [Zingiber officinale]
	Cluster-36254.4	0.3	0.53	0.9	0.576667	0.1	0	0.04	0.0466667	6873	anthocyanidin 5,3-O-glucosyltransferase-like [Zingiber officinale]
	Cluster-36254.5	0.63	0.68	0.77	0.693333	0.43	0.62	0.58	0.543333	7387	anthocyanidin 5,3-O-glucosyltransferase-like [Zingiber officinale]
	Cluster-36254.6	8.34	7.14	7.35	7.61	11.13	11.93	10.91	11.3233	4181	anthocyanidin 5,3-O-glucosyltransferase-like [Zingiber officinale]
	Cluster-36254.7	0.97	0.66	2.07	1.23333	5.27	4.06	3.53	4.28667	7473	anthocyanidin 5,3-O-glucosyltransferase-like [Zingiber officinale]
FLS	Cluster-18596.0	96.78	96.59	96.63	96.6667	100.12	96.12	97.9	98.0467	1619	flavonol synthase [Musa troglodytarum]	无变化
	Cluster-23704.0	3.31	3.46	4.02	3.59667	1.79	2.12	1.97	1.96	1481	PREDICTED: flavonol synthase/flavanone 3-hydroxylase-like isoform X2 [Musa acuminata subsp. malaccensis]	down
	Cluster-26011.0	0.05	0.1	0	0.05	2.78	3.42	2.06	2.75333	1142	PREDICTED: flavonol synthase/flavanone 3-hydroxylase-like [Musa acuminata subsp. malaccensis]	up
AOMT	Cluster-31247.0	0.3	0.35	0.24	0.296667	0.87	0.48	0.67	0.673333	1056	malonyl-coenzyme A:anthocyanin 3-O-glucoside-6''-O-malonyltransferase-like [Elaeis guineensis]

## Sheet: 热图
Supplementary Table S7 Expression pattern of predicted unigenes implicated in flavonoid biosynthesis in the wild type and ‘Erebus’ cultivar of C. glauca
Putative gene name	Gene ID	CgpsY-fpkm	CgpsP-fpkm	Length	Annotation
PAL	Cluster-8955.0	0.343333	0.65	873	phenylalanine ammonia lyase 2, partial [Rhaphiolepis bibas]
4CL	Cluster-20040.0	10.0033	13.36	2241	PREDICTED: 4-coumarate--CoA ligase 1-like [Musa acuminata subsp. malaccensis]
	Cluster-14320	11.3933	7.64	1995	4-coumarate-coa ligase [Musa troglodytarum]
C4H	Cluster-19355.0	0.343333	0.283333	747	cinnamate-4-hydroxylase [Rubus sp. SSL-2007]
	Cluster-32574.0	2.97	1.10333	993	cinnamate 4-hydroxylase, partial [Musa acuminata AAA Group]
	Cluster-32574.1	0.276667	1.65	759	cinnamate 4-hydroxylase, partial [Musa acuminata AAA Group]
CHS	Cluster-17340.0	201.973	118.2	1361	chalcone synthase 2 [Elaeis guineensis]
	Cluster-17340.1	5.12	2.16667	1435	chalcone synthase 2 [Elaeis guineensis]
	Cluster-17340.2	785.003	3181.88	1382	hypothetical protein MUK42_14990 [Musa troglodytarum]
	Cluster-4150.0	0.493333	0.456667	911	chalcone synthase-like [Vitis riparia]
CHI	Cluster-19019.0	50.0633	36.8	2624	Chalcone isomerase protein [Dioscorea alata]
	Cluster-26459.0	986.73	976.75	836	chalcone isomerase [Canna x generalis]
	Cluster-26459.1	13.8733	6.57333	1261	RecName: Full=Chalcone--flavanone isomerase; Short=Chalcone isomerase [Canna x generalis]
F3H	Cluster-12247.0	0.356667	0.506667	1172	naringenin,2-oxoglutarate 3-dioxygenase [Quercus suber]
F3'H	Cluster-16437.0	10.5833	163.9	1638	Naringenin,2-oxoglutarate 3-dioxygenase [Musa troglodytarum]
DFR	Cluster-20066.0	3.51667	67.36	1453	PREDICTED: dihydroflavonol-4-reductase [Musa acuminata subsp. malaccensis]
ANS	Cluster-30952.0	0.31	0.453333	657	anthocyanidin synthase [Liquidambar formosana]
GT	Cluster-36254.0	1.16333	0.113333	7594	anthocyanidin 5,3-O-glucosyltransferase-like [Zingiber officinale]
	Cluster-36254.1	0.133333	0.516667	6196	anthocyanidin 5,3-O-glucosyltransferase-like [Zingiber officinale]
	Cluster-36254.2	3.07	0	7474	anthocyanidin 5,3-O-glucosyltransferase-like [Zingiber officinale]
	Cluster-36254.4	0.576667	0.0466667	6873	anthocyanidin 5,3-O-glucosyltransferase-like [Zingiber officinale]
	Cluster-36254.5	0.693333	0.543333	7387	anthocyanidin 5,3-O-glucosyltransferase-like [Zingiber officinale]
	Cluster-36254.6	7.61	11.3233	4181	anthocyanidin 5,3-O-glucosyltransferase-like [Zingiber officinale]
	Cluster-36254.7	1.23333	4.28667	7473	anthocyanidin 5,3-O-glucosyltransferase-like [Zingiber officinale]
	Cluster-13799.0	0.626667	3.81667	881	anthocyanidin 3-O-glucosyltransferase-like
	Cluster-27682.0	6.09333	1.74333	1989	anthocyanidin 3-O-glucosyltransferase-like
	Cluster-13713.0	1.19667	9.84	1102	anthocyanidin 3-O-glucosyltransferase-like
FLS	Cluster-18596.0	96.6667	98.0467	1619	flavonol synthase [Musa troglodytarum]
	Cluster-23704.0	3.59667	1.96	1481	PREDICTED: flavonol synthase/flavanone 3-hydroxylase-like isoform X2 [Musa acuminata subsp. malaccensis]
	Cluster-26011.0	0.05	2.75333	1142	PREDICTED: flavonol synthase/flavanone 3-hydroxylase-like [Musa acuminata subsp. malaccensis]
AOMT	Cluster-31247.0	0.296667	0.673333	1056	malonyl-coenzyme A:anthocyanin 3-O-glucoside-6''-O-malonyltransferase-like [Elaeis guineensis]
