# Supplementary material for: Integrated Metabolome and Transcriptome Analyses Reveal That the Flavonoid Metabolic Pathway Is Associated with Pigment Differential Accumulation in Two Colors of Petaloid Staminodes in Canna glauca
Source: MDPI journal article supplement (doi:10.3390/horticulturae10040372), 2024-04-07
Supplement: s1 [file s1 › Supplementary Table S8.xlsx]

## Sheet: Sheet1
Supplementary Table S8 The correlation between 3GT-like genes and anthocyanins
geneID	KEGG_map_geneID	metaID	Compounds	Class I	KEGG_map_metaID	coefficient	pvalue	relationType
Cluster-13713.0	ko00942,ko01100,ko01110	Zbjp001957	Cyanidin-3,5-O-diglucoside (Cyanin)	Flavonoids	ko00942	0.987691	0.000226323	gene-meta
Cluster-27682.0	ko00942,ko01100,ko01110	Zbjp001957	Cyanidin-3,5-O-diglucoside (Cyanin)	Flavonoids	ko00942	-0.968519	0.00147099	gene-meta
Cluster-13799.0	ko00942,ko01100,ko01110	Zbjp001957	Cyanidin-3,5-O-diglucoside (Cyanin)	Flavonoids	ko00942	0.969826	0.00135201	gene-meta
Cluster-13713.0	ko00942,ko01100,ko01110	pmb0542	Cyanidin-3-O-(6''-O-malonyl)glucoside	Flavonoids	ko00942	0.973946	0.00100938	gene-meta
Cluster-27682.0	ko00942,ko01100,ko01110	pmb0542	Cyanidin-3-O-(6''-O-malonyl)glucoside	Flavonoids	ko00942	-0.928	0.00758936	gene-meta
Cluster-13799.0	ko00942,ko01100,ko01110	pmb0542	Cyanidin-3-O-(6''-O-malonyl)glucoside	Flavonoids	ko00942	0.948915	0.00384781	gene-meta
Cluster-13713.0	ko00942,ko01100,ko01110	pmb0550	Cyanidin-3-O-glucoside (Kuromanin)*	Flavonoids	ko00942,ko01110	0.98582	0.000300186	gene-meta
Cluster-27682.0	ko00942,ko01100,ko01110	pmb0550	Cyanidin-3-O-glucoside (Kuromanin)*	Flavonoids	ko00942,ko01110	-0.965863	0.00172812	gene-meta
Cluster-13799.0	ko00942,ko01100,ko01110	pmb0550	Cyanidin-3-O-glucoside (Kuromanin)*	Flavonoids	ko00942,ko01110	0.96397	0.0019239	gene-meta
Cluster-13713.0	ko00942,ko01100,ko01110	Zbcp002823	Cyanidin-3-O-rutinoside (Keracyanin)	Flavonoids	ko00942	0.984739	0.000347589	gene-meta
Cluster-27682.0	ko00942,ko01100,ko01110	Zbcp002823	Cyanidin-3-O-rutinoside (Keracyanin)	Flavonoids	ko00942	-0.961289	0.00221881	gene-meta
Cluster-13799.0	ko00942,ko01100,ko01110	Zbcp002823	Cyanidin-3-O-rutinoside (Keracyanin)	Flavonoids	ko00942	0.963416	0.00198308	gene-meta
Cluster-13713.0	ko00942,ko01100,ko01110	Lmjp001877	Cyanidin-3-O-sambubioside[Cyanidin-3-O-(2''-O-xylosyl)glucoside]	Flavonoids	ko00942	0.97266	0.00111098	gene-meta
Cluster-27682.0	ko00942,ko01100,ko01110	Lmjp001877	Cyanidin-3-O-sambubioside[Cyanidin-3-O-(2''-O-xylosyl)glucoside]	Flavonoids	ko00942	-0.93915	0.0054414	gene-meta
Cluster-13799.0	ko00942,ko01100,ko01110	Lmjp001877	Cyanidin-3-O-sambubioside[Cyanidin-3-O-(2''-O-xylosyl)glucoside]	Flavonoids	ko00942	0.953466	0.00319775	gene-meta
Cluster-13713.0	ko00942,ko01100,ko01110	pme0444	Malvidin-3-O-glucoside (Oenin)*	Flavonoids	ko00942	-0.957895	0.00262195	gene-meta
Cluster-27682.0	ko00942,ko01100,ko01110	pme0444	Malvidin-3-O-glucoside (Oenin)*	Flavonoids	ko00942	0.969156	0.00141235	gene-meta
Cluster-13799.0	ko00942,ko01100,ko01110	pme0444	Malvidin-3-O-glucoside (Oenin)*	Flavonoids	ko00942	-0.955582	0.00291565	gene-meta
Cluster-13713.0	ko00942,ko01100,ko01110	pme1793	Pelargonidin-3,5-O-diglucoside	Flavonoids	ko00942	0.956909	0.00274518	gene-meta
Cluster-27682.0	ko00942,ko01100,ko01110	pme1793	Pelargonidin-3,5-O-diglucoside	Flavonoids	ko00942	-0.981533	0.00050841	gene-meta
Cluster-13799.0	ko00942,ko01100,ko01110	pme1793	Pelargonidin-3,5-O-diglucoside	Flavonoids	ko00942	0.942624	0.0048435	gene-meta
Cluster-13713.0	ko00942,ko01100,ko01110	pmb0554	Pelargonidin-3-O-(6''-O-malonyl)glucoside	Flavonoids	ko00942	0.923932	0.0084594	gene-meta
Cluster-27682.0	ko00942,ko01100,ko01110	pmb0554	Pelargonidin-3-O-(6''-O-malonyl)glucoside	Flavonoids	ko00942	-0.97521	0.00091418	gene-meta
Cluster-13799.0	ko00942,ko01100,ko01110	pmb0554	Pelargonidin-3-O-(6''-O-malonyl)glucoside	Flavonoids	ko00942	0.910954	0.0115407	gene-meta
Cluster-13713.0	ko00942,ko01100,ko01110	pme3392	Pelargonidin-3-O-glucoside	Flavonoids	ko00942,ko01100,ko01110	0.988401	0.000201025	gene-meta
Cluster-27682.0	ko00942,ko01100,ko01110	pme3392	Pelargonidin-3-O-glucoside	Flavonoids	ko00942,ko01100,ko01110	-0.970007	0.00133586	gene-meta
Cluster-13799.0	ko00942,ko01100,ko01110	pme3392	Pelargonidin-3-O-glucoside	Flavonoids	ko00942,ko01100,ko01110	0.970439	0.00129783	gene-meta
Cluster-13713.0	ko00942,ko01100,ko01110	Zbsp002256	Pelargonidin-3-O-rutinoside	Flavonoids	ko00942	0.985535	0.000312355	gene-meta
Cluster-27682.0	ko00942,ko01100,ko01110	Zbsp002256	Pelargonidin-3-O-rutinoside	Flavonoids	ko00942	-0.959094	0.0024757	gene-meta
Cluster-13799.0	ko00942,ko01100,ko01110	Zbsp002256	Pelargonidin-3-O-rutinoside	Flavonoids	ko00942	0.963757	0.00194658	gene-meta
Cluster-13713.0	ko00942,ko01100,ko01110	Zblp002396	Peonidin-3-O-glucoside	Flavonoids	ko00942	0.988223	0.000207231	gene-meta
Cluster-27682.0	ko00942,ko01100,ko01110	Zblp002396	Peonidin-3-O-glucoside	Flavonoids	ko00942	-0.981581	0.000505772	gene-meta
Cluster-13799.0	ko00942,ko01100,ko01110	Zblp002396	Peonidin-3-O-glucoside	Flavonoids	ko00942	0.97154	0.00120344	gene-meta
