# Supplementary figures and images for: Integrated Metabolome and Transcriptome Analyses Reveal That the Flavonoid Metabolic Pathway Is Associated with Pigment Differential Accumulation in Two Colors of Petaloid Staminodes in Canna glauca
Source: MDPI journal article supplement (doi:10.3390/horticulturae10040372), 2024-04-07

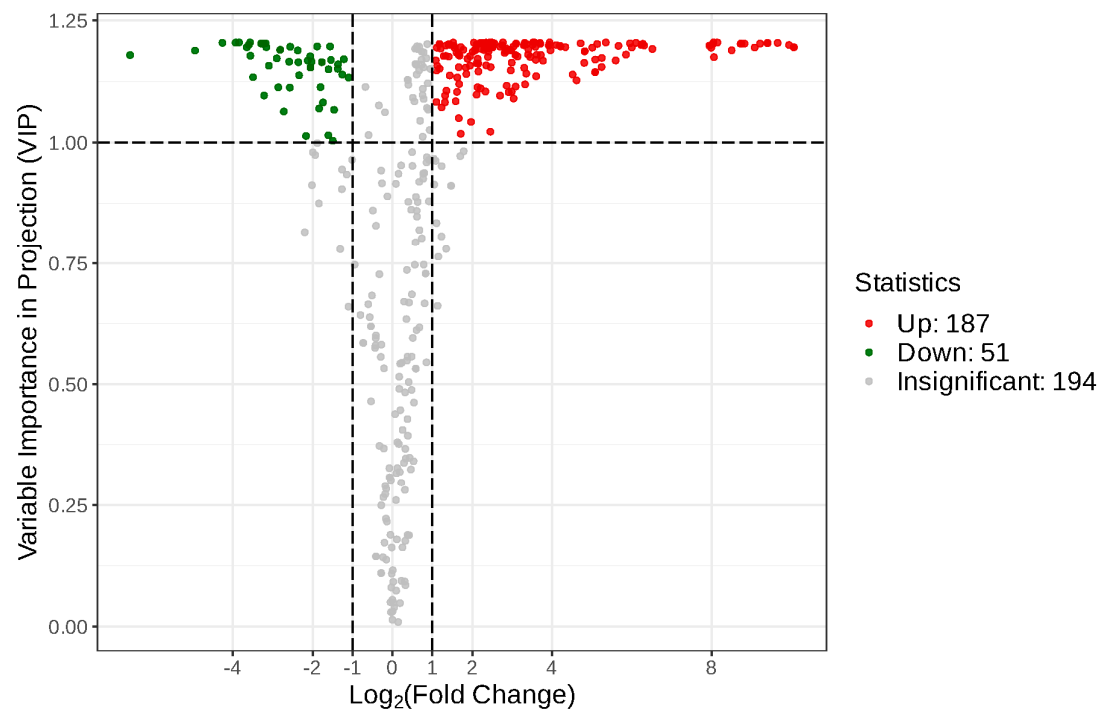

Figure S1 The volcano plot illustrating DAFs between CgpsP and CgpsY

Supplement: s1 [file s1 › Supplemenraty Figure S1.pdf]

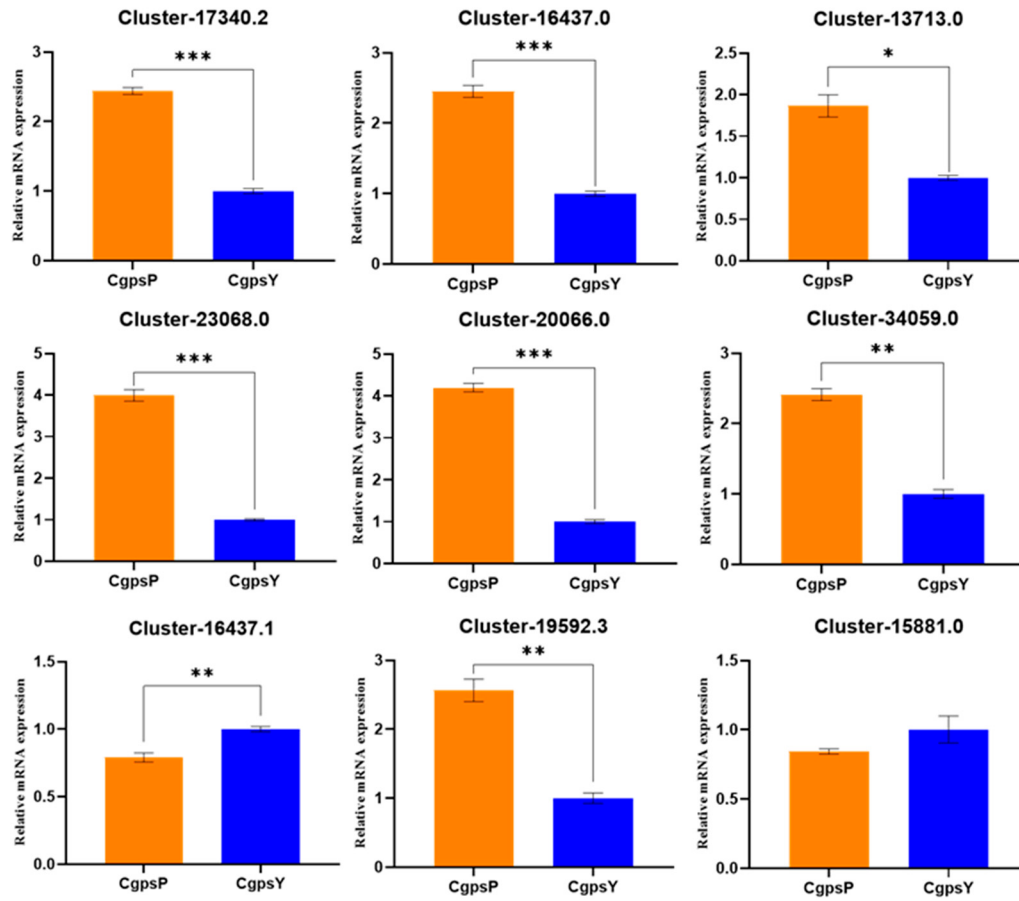

Figure S3 The validation of the FPKM obtained in the transcriptome by qRT-PCR

Supplement: s1 [file s1 › Supplemenraty Figure S3.pdf]

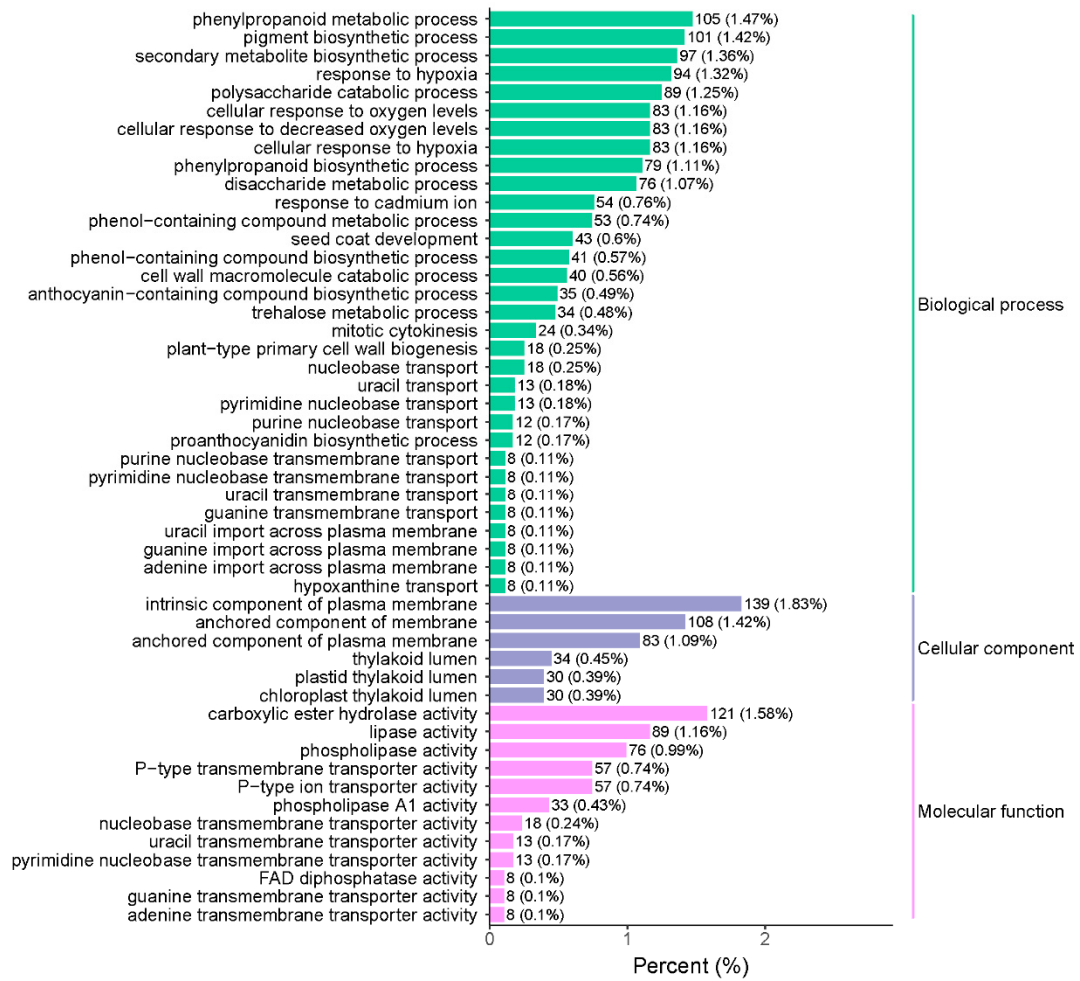

Figure S2 The barplot of GO enrichment of DEGs

Supplement: s1 [file s1 › Supplementary Figure S2.pdf]
